# Supplementary material for: Significance of anaerobic oxidation of methane (AOM) in mitigating methane emission from major natural and anthropogenic sources: a review of AOM rates in recent publications
Source: Royal Society of Chemistry journal article supplement (doi:10.1039/d2va00091a), 2022-01-01
Supplement: d2va00091a1.pdf [file d2va00091a1.pdf]

## Supplementary Materials

### Significance of anaerobic oxidation of methane (AOM) in mitigating methane emission from major natural and anthropogenic sources: a review of AOM rates in recent publications

Yaohuan Gao<sup>a</sup>, Yong Wang<sup>a</sup>, Hyung-Sool Lee<sup>b,c</sup>, Pengkang Jin<sup>a\*</sup>

<sup>a</sup> Institute of Global Environmental Change, School of Human Settlements and Civil Engineering, Xi'an Jiaotong University, Xi'an, China

<sup>b</sup> Institute for Environmental and Climate Technology, Korea Institute of Energy Technology (KENTECH) 200 Hyeoksins-ro, Naju-si, Jeollanam-do, Republic of Korea

<sup>c</sup> Department of Civil & Environmental Engineering, University of Waterloo, 200 University Avenue West, ON, Canada N2L 3G1

\*Corresponding Author:

Email: [pkjin@xjtu.edu.cn](mailto:pkjin@xjtu.edu.cn)

Institute of Global Environmental Change

Xi'an Jiaotong University

No.19 Building, iHarbour campus,

Xi'an District, Xi'an, 712000, Shaanxi, China

#### Description of the material:

- 52 pages
- Text on CiteSpace analysis, statistical data analysis, and AOM information for cold seep systems
- Table S1 showing data used for Table 1
- Tables S2-S9 showing the rate information for Figures 3-7

## Methods

### CiteSpace and the procedure of co-citation analysis

Publications from 2010 until 2021 were screened by using the keywords “Anaerobic methanotroph\*” or “anaerobic methane oxidation” or “reverse methanogenesis” or “Nitrite-driven anaerobic methane oxidation” or “Nitrate-driven anaerobic methane oxidation” or “Nitrate-dependent anaerobic methane oxidation” or “Nitrite-dependent anaerobic methane oxidation” from the Web of Science Core Collection. Totally 1384 articles and reviews were returned and the full data of the search results were directly processed and exported for analysis using CiteSpace (5.3.R11) software.

CiteSpace is a Java-based bibliometric software for the visualization and analysis of co-citation networks, with the primary purpose being to facilitate the analysis of the emerging trend in a knowledge domain<sup>1</sup>. It also allows us to investigate the knowledge structure in relevant knowledge fields, and detect correlations in scientific literature.

The selected articles were imported into CiteSpace. The time slice was set to one year. Some of the main settings are g-index 20, Top N = 30, and Top N% 5. For the co-citation network analysis, the “term source” was extracted from the title, abstract, and author keywords. The “term type” was set as “noun phrases”. The “node type” was set as “reference” and “keyword”. The first set of the “threshold” values was set to “5, 5, 20” (i.e., citation, co-citation, and cosine coefficient value) to reduce the number of nodes and “Pathfinder” was also checked to further simplify the network.

The co-citation network is presented in the form of nodes and lines (Figure 1). The size of nodes reflects the frequency of relevant data references or occurrences, the lines indicate the relationship between the nodes, and the thickness of the lines between nodes reflects the strength of links between data. The quality of the clustering effect was measured using modularity (Q) and average silhouette score (S). Specifically, the Q value represents the degree of modularity;  $Q \geq 0.3$  means that the modularization of the network is significant, and a higher Q corresponds to improved clustering. The S value measures the homogeneity of networks;  $S \geq 0.5$  means that the result of clustering is reasonable, and a higher S corresponds to the increased homogeneity of the network. The maximum of both values is one. Here, the obtained Q is 0.7417, S is 0.8942, and the harmonic mean is 0.8108. The clusters were named by terms from the titles.

### Collection of the AOM rates, data analysis, and more

Most of the AOM rates were directly imported from a reference after the conversion of the unit. Some others were computed by dividing the reported rate of methane oxidation (e.g.  $\mu\text{mol CH}_4/\text{hour}$ ) by the reactive slurry volume or the volume of studied soil/sediment during AOM rate measurement. Due to the various liquid volumes applied during rate measurement, the unit mass (g) is not converted to unit volume ( $1\text{ cm}^3$ ) unless the density is also reported. For DAMO systems, the AOM rates were obtained following the stoichiometric relationships as shown in the main text<sup>2</sup>.

Normality was checked with the *DistributionFitTest* function and the Cramér-von Mises test in Wolfram Mathematica 11.3. The null hypotheses that the nitrate-/nitrite-AOM rates and the K values of either freshwater or marine environment are distributed according to the normal distribution were rejected ( $p < 0.01$ ,  $\alpha = 0.05$ ). Then, the homogeneity of variance of the two groups of rates was checked with *VarianceEquivalenceTest* function, and returned a p-value of 0.06. Hence, the null hypothesis that the populations have equal variances is not rejected at the 5 percent level based on the Conover test. So, Mann-Whitney U-test was applied in the comparison of these independent rates of nitrate-DAMO and nitrite-DAMO. Following these same analyses, Mann-Whitney U-test was also applied for comparing these independent K values of different methanotrophs in the freshwater or marine environment.

Normality of AOM rates grouped by various environments was checked with the *DistributionFitTest* function as well. The AOM rates in freshwaters and wetlands did not pass the normality check, with p-

values less than  $10^{-8}$ , while the AOM rate in paddy fields showed a p-value of 0.056. Besides, the homogeneity of variance of AOM rates in freshwaters, wetlands, and paddy fields was checked with *VarianceEquivalenceTest* function, which returned a p-value of 0.00302 (Conover), indicating the three variances are not equal. Therefore, the Mood's median test was selected to compare the medians of AOM rates in these three environments. Besides, the rates of AOM and aerobic methane oxidation in lakes/ponds/reservoirs did not pass the normality check (p-values<0.001) and the homogeneity of variance test (p-values< $10^{-8}$ , Conover) either, and thus the comparison of the rates in anoxic and aerobic conditions was conducted with Mood's median test as well. The Sankey plot (Figure 8) was prepared online (<https://sankeymatic.com/>).

### AOM rates information and capacity estimation in cold seep systems

AOM at simulated ocean bottom pressures with samples collected from various cold seep systems and coastal marine basins showed rates of  $0.5\text{--}2.8 \times 10^4$  nmol CH<sub>4</sub>/cm<sup>3</sup>/d (n=38, median=141 nmol CH<sub>4</sub>/cm<sup>3</sup>/d, Q1-Q3: 16-100 nmol CH<sub>4</sub>/cm<sup>3</sup>/d)<sup>3-11</sup>. If the estimate of global cold seeps coverage ( $1.98 \times 10^{10}$  m<sup>2</sup>) by Boetius and Wenzhöfer<sup>12</sup> is used and AOM is assumed to occur at a median depth of 20 cm (range 15-30 cm) in seep sediments<sup>13</sup>, AOM is capable of oxidizing 3 [Q1-Q3: 0.4-39.6] Tg CH<sub>4</sub>/year (Table 1) in cold seep systems.

**Table S1.** Depth information for methane oxidation capacity potential computation in Table 1 (refer to the main text for some of the references listed in this table). Outliers were removed following a method reported elsewhere<sup>14</sup>.

| Inner shelf, 0-10 m |            |                                                                           |
|---------------------|------------|---------------------------------------------------------------------------|
| Depth [m]           | SMT [mbsf] | Reference                                                                 |
| 0.1                 | 4.2        | 2018 Global diffusive fluxes of methane in marine sediments <sup>15</sup> |
| 0.1                 | 2.8        | 2018 Global diffusive fluxes of methane in marine sediments               |
| 0.3                 | 0.3        | 2018 Global diffusive fluxes of methane in marine sediments               |
| 0.3                 | 0.4        | 2018 Global diffusive fluxes of methane in marine sediments               |
| 0.3                 | 0.4        | 2018 Global diffusive fluxes of methane in marine sediments               |
| 0.4                 | 0.3        | 2018 Global diffusive fluxes of methane in marine sediments               |
| 0.4                 | 0.4        | 2018 Global diffusive fluxes of methane in marine sediments               |
| 0.4                 | 0.5        | 2018 Global diffusive fluxes of methane in marine sediments               |
| 0.5                 | 0.4        | 2018 Global diffusive fluxes of methane in marine sediments               |
| 0.6                 | 0.6        | 2018 Global diffusive fluxes of methane in marine sediments               |
| 1.5                 | 0.2        | 2018 Global diffusive fluxes of methane in marine sediments               |
| 2                   | 0.5        | 2018 Global diffusive fluxes of methane in marine sediments               |
| 2                   | 0.1        | 2018 Global diffusive fluxes of methane in marine sediments               |
| 4                   | 0.2        | 2018 Global diffusive fluxes of methane in marine sediments               |
| 7                   | 0.9        | 2018 Global diffusive fluxes of methane in marine sediments               |
| 7                   | 1.3        | 2018 Global diffusive fluxes of methane in marine sediments               |
| 7                   | 1.3        | 2018 Global diffusive fluxes of methane in marine sediments               |
| 7.8                 | 0.7        | 2018 Global diffusive fluxes of methane in marine sediments               |
| 9                   | 1.1        | 2018 Global diffusive fluxes of methane in marine sediments               |
| 9.4                 | 4.2        | 2018 Global diffusive fluxes of methane in marine sediments               |
| 10                  | 0.04       | 2018 Global diffusive fluxes of methane in marine sediments               |
| 10                  | 0.1        | 2018 Global diffusive fluxes of methane in marine sediments               |
| 10                  | 1.2        | 2018 Global diffusive fluxes of methane in marine sediments               |

| Inner shelf, 10-50 m |            |                                                                                                                                              |
|----------------------|------------|----------------------------------------------------------------------------------------------------------------------------------------------|
| Depth [m]            | SMT [mbsf] | Reference                                                                                                                                    |
| 25                   | 0.05       | 2018 Global diffusive fluxes of methane in marine sediments                                                                                  |
| 26                   | 0.05       | 2013 Quantitative analysis of anaerobic oxidation of methane (AOM) in marine sediments=A modeling perspective                                |
| 25                   | 0.09       | 2013 Quantitative analysis of anaerobic oxidation of methane (AOM) in marine sediments=A modeling perspective                                |
| 33.2                 | 0.1        | 2018 Global diffusive fluxes of methane in marine sediments                                                                                  |
| 40                   | 0.1        | 2018 Global diffusive fluxes of methane in marine sediments                                                                                  |
| 45                   | 0.1        | 2017 Anaerobic Methane-Oxidizing Microbial Community in a Coastal Marine Sediment: Anaerobic Methanotrophy Dominated by ANME-3 <sup>16</sup> |
| 18.8                 | 0.2        | 2018 Global diffusive fluxes of methane in marine sediments                                                                                  |
| 18.8                 | 0.2        | 2018 Global diffusive fluxes of methane in marine sediments                                                                                  |
| 33.2                 | 0.2        | 2018 Global diffusive fluxes of methane in marine sediments                                                                                  |
| 37                   | 0.2        | 2018 Global diffusive fluxes of methane in marine sediments                                                                                  |
| 25                   | 0.29       | 2013 Quantitative analysis of anaerobic oxidation of methane (AOM) in marine sediments=A modeling perspective                                |
| 20.8                 | 0.3        | 2018 Global diffusive fluxes of methane in marine sediments                                                                                  |
| 26                   | 0.3        | 2018 Global diffusive fluxes of methane in marine sediments                                                                                  |
| 26                   | 0.3        | 2013 Quantitative analysis of anaerobic oxidation of methane (AOM) in marine sediments=A modeling perspective                                |
| 26                   | 0.3        | 2013 Quantitative analysis of anaerobic oxidation of methane (AOM) in marine sediments=A modeling perspective                                |
| 48                   | 0.3        | 2018 Global diffusive fluxes of methane in marine sediments                                                                                  |
| 25                   | 0.35       | 2013 Quantitative analysis of anaerobic oxidation of methane (AOM) in marine sediments=A modeling perspective                                |
| 17.3                 | 0.4        | 2018 Global diffusive fluxes of methane in marine sediments                                                                                  |
| 25                   | 0.4        | 2018 Global diffusive fluxes of methane in marine sediments                                                                                  |
| 26                   | 0.4        | 2018 Global diffusive fluxes of methane in marine sediments                                                                                  |
| 45                   | 0.4        | 2018 Global diffusive fluxes of methane in marine sediments                                                                                  |
| 25.1                 | 0.5        | 2018 Global diffusive fluxes of methane in marine sediments                                                                                  |
| 27.5                 | 0.5        | 2018 Global diffusive fluxes of methane in marine sediments                                                                                  |
| 30                   | 0.5        | 2018 Global diffusive fluxes of methane in marine sediments                                                                                  |
| 44                   | 0.5        | 2018 Global diffusive fluxes of methane in marine sediments                                                                                  |
| 45                   | 0.5        | 2008 Thermodynamic and kinetic control on anaerobic oxidation of methane in marine sediments                                                 |
| 17.3                 | 0.6        | 2018 Global diffusive fluxes of methane in marine sediments                                                                                  |
| 23                   | 0.7        | 2018 Global diffusive fluxes of methane in marine sediments                                                                                  |
| 36                   | 0.7        | 2018 Global diffusive fluxes of methane in marine sediments                                                                                  |
| 46                   | 0.7        | 2018 Global diffusive fluxes of methane in marine sediments                                                                                  |
| 15                   | 0.7        | 2019 Global diffusive fluxes of methane in marine sediments                                                                                  |
| 23                   | 0.8        | 2018 Global diffusive fluxes of methane in marine sediments                                                                                  |
| 19                   | 0.9        | 2018 Global diffusive fluxes of methane in marine sediments                                                                                  |
| 29                   | 1          | 2018 Global diffusive fluxes of methane in marine sediments                                                                                  |
| 44                   | 1          | 2018 Global diffusive fluxes of methane in marine sediments                                                                                  |
| 50                   | 1          | 2018 Global diffusive fluxes of methane in marine sediments                                                                                  |
| 27                   | 1.1        | 2013 Quantitative analysis of anaerobic oxidation of methane (AOM) in marine sediments=A modeling perspective                                |
| 40                   | 1.1        | 2013 Quantitative analysis of anaerobic oxidation of methane (AOM) in marine sediments=A modeling perspective                                |
| 21                   | 1.2        | 2018 Global diffusive fluxes of methane in marine sediments                                                                                  |
| 47                   | 1.3        | 2018 Global diffusive fluxes of methane in marine sediments                                                                                  |

|      |      |                                                                                                               |
|------|------|---------------------------------------------------------------------------------------------------------------|
| 22   | 1.4  | 2018 Global diffusive fluxes of methane in marine sediments                                                   |
| 15   | 1.5  | 2013 Quantitative analysis of anaerobic oxidation of methane (AOM) in marine sediments=A modeling perspective |
| 19.5 | 1.6  | 2018 Global diffusive fluxes of methane in marine sediments                                                   |
| 28   | 1.6  | 2018 Global diffusive fluxes of methane in marine sediments                                                   |
| 16   | 1.85 | 2013 Quantitative analysis of anaerobic oxidation of methane (AOM) in marine sediments=A modeling perspective |
| 15   | 1.9  | 2018 Global diffusive fluxes of methane in marine sediments                                                   |
| 20   | 2    | 2018 Global diffusive fluxes of methane in marine sediments                                                   |
| 40   | 2.1  | 2018 Global diffusive fluxes of methane in marine sediments                                                   |
| 16.1 | 2.3  | 2018 Global diffusive fluxes of methane in marine sediments                                                   |
| 19.1 | 2.3  | 2018 Global diffusive fluxes of methane in marine sediments                                                   |
| 19.3 | 2.4  | 2018 Global diffusive fluxes of methane in marine sediments                                                   |
| 22   | 2.4  | 2018 Global diffusive fluxes of methane in marine sediments                                                   |
| 19.1 | 2.5  | 2018 Global diffusive fluxes of methane in marine sediments                                                   |
| 34   | 2.8  | 2018 Global diffusive fluxes of methane in marine sediments                                                   |
| 19   | 2.9  | 2018 Global diffusive fluxes of methane in marine sediments                                                   |
| 19.1 | 3.5  | 2018 Global diffusive fluxes of methane in marine sediments                                                   |
| 19   | 3.6  | 2018 Global diffusive fluxes of methane in marine sediments                                                   |
| 49   | 3.7  | 2018 Global diffusive fluxes of methane in marine sediments                                                   |
| 20   | 3.8  | 2018 Global diffusive fluxes of methane in marine sediments                                                   |
| 18.8 | 3.9  | 2018 Global diffusive fluxes of methane in marine sediments                                                   |
| 18.8 | 4    | 2018 Global diffusive fluxes of methane in marine sediments                                                   |
| 18   | 4.7  | 2018 Global diffusive fluxes of methane in marine sediments                                                   |
| 18.6 | 4.7  | 2018 Global diffusive fluxes of methane in marine sediments                                                   |
| 28   | 4.8  | 2018 Global diffusive fluxes of methane in marine sediments                                                   |
| 16.8 | 5.2  | 2018 Global diffusive fluxes of methane in marine sediments                                                   |

**Outer shelf,  
50-200 m**

| <b>Depth<br/>[m]</b> | <b>SMT<br/>[mbsf]</b> | <b>Reference</b>                                                                                            |
|----------------------|-----------------------|-------------------------------------------------------------------------------------------------------------|
| 90                   | 0.2                   | 2018 Global diffusive fluxes of methane in marine sediments                                                 |
| 65                   | 0.3                   | 2018 Global diffusive fluxes of methane in marine sediments                                                 |
| 87                   | 0.3                   | 2018 Global diffusive fluxes of methane in marine sediments                                                 |
| 74                   | 0.4                   | 2018 Global diffusive fluxes of methane in marine sediments                                                 |
| 93                   | 0.4                   | 2018 Global diffusive fluxes of methane in marine sediments                                                 |
| 74                   | 0.5                   | 2018 Global diffusive fluxes of methane in marine sediments                                                 |
| 96                   | 0.5                   | 2018 Global diffusive fluxes of methane in marine sediments                                                 |
| 146.8                | 0.5                   | 2018 Global diffusive fluxes of methane in marine sediments                                                 |
| 120                  | 0.5                   | 2020 Rates and Microbial Players of Iron-Driven Anaerobic Oxidation of Methane in Methanic Marine Sediments |
| 147                  | 0.5                   | 2008 Thermodynamic and kinetic control on anaerobic oxidation of methane in marine sediments                |
| 72                   | 0.6                   | 2018 Global diffusive fluxes of methane in marine sediments                                                 |
| 77                   | 0.7                   | 2018 Global diffusive fluxes of methane in marine sediments                                                 |
| 93                   | 0.7                   | 2018 Global diffusive fluxes of methane in marine sediments                                                 |
| 120.2                | 0.7                   | 2018 Global diffusive fluxes of methane in marine sediments                                                 |
| 74                   | 0.8                   | 2018 Global diffusive fluxes of methane in marine sediments                                                 |
| 74                   | 0.8                   | 2018 Global diffusive fluxes of methane in marine sediments                                                 |
| 77                   | 0.8                   | 2018 Global diffusive fluxes of methane in marine sediments                                                 |

|      |       |                                                                                                               |
|------|-------|---------------------------------------------------------------------------------------------------------------|
| 128  | 0.8   | 2018 Global diffusive fluxes of methane in marine sediments                                                   |
| 52   | 0.9   | 2018 Global diffusive fluxes of methane in marine sediments                                                   |
| 200  | 0.9   | 2018 Global diffusive fluxes of methane in marine sediments                                                   |
| 150  | 0.9   | 2001 Sulfate reduction and anaerobic methane oxidation in Black Sea sediments                                 |
| 92   | 1     | 2018 Global diffusive fluxes of methane in marine sediments                                                   |
| 70   | 1.1   | 2018 Global diffusive fluxes of methane in marine sediments                                                   |
| 75   | 1.1   | 2018 Global diffusive fluxes of methane in marine sediments                                                   |
| 110  | 1.1   | 2013 Quantitative analysis of anaerobic oxidation of methane (AOM) in marine sediments=A modeling perspective |
| 109  | 1.2   | 2018 Global diffusive fluxes of methane in marine sediments                                                   |
| 86.3 | 1.4   | 2018 Global diffusive fluxes of methane in marine sediments                                                   |
| 65   | 1.5   | 2018 Global diffusive fluxes of methane in marine sediments                                                   |
| 100  | 1.7   | 2018 Global diffusive fluxes of methane in marine sediments                                                   |
| 145  | 1.7   | 2018 Global diffusive fluxes of methane in marine sediments                                                   |
| 70   | 1.8   | 2018 Global diffusive fluxes of methane in marine sediments                                                   |
| 130  | 1.8   | 2018 Global diffusive fluxes of methane in marine sediments                                                   |
| 130  | 1.8   | 2013 Quantitative analysis of anaerobic oxidation of methane (AOM) in marine sediments=A modeling perspective |
| 98   | 2     | 2018 Global diffusive fluxes of methane in marine sediments                                                   |
| 181  | 2.1   | 2018 Global diffusive fluxes of methane in marine sediments                                                   |
| 181  | 2.1   | 2013 Quantitative analysis of anaerobic oxidation of methane (AOM) in marine sediments=A modeling perspective |
| 178  | 2.2   | 2018 Global diffusive fluxes of methane in marine sediments                                                   |
| 87   | 2.3   | 2018 Global diffusive fluxes of methane in marine sediments                                                   |
| 81   | 2.6   | 2018 Global diffusive fluxes of methane in marine sediments                                                   |
| 86   | 3.1   | 2013 Quantitative analysis of anaerobic oxidation of methane (AOM) in marine sediments=A modeling perspective |
| 53   | 3.2   | 2018 Global diffusive fluxes of methane in marine sediments                                                   |
| 73   | 4     | 2018 Global diffusive fluxes of methane in marine sediments                                                   |
| 126  | 16.3  | 2018 Global diffusive fluxes of methane in marine sediments                                                   |
| 98   | 19.9  | 2018 Global diffusive fluxes of methane in marine sediments                                                   |
| 119  | 28    | 2018 Global diffusive fluxes of methane in marine sediments                                                   |
| 151  | 29.6  | 2018 Global diffusive fluxes of methane in marine sediments                                                   |
| 152  | 29.6  | 2018 Global diffusive fluxes of methane in marine sediments                                                   |
| 88   | 355.8 | 2018 Global diffusive fluxes of methane in marine sediments                                                   |

#### Slope, 200-2000 m

| Depth [m] | SMT [mbsf] | Reference                                                                                                     |
|-----------|------------|---------------------------------------------------------------------------------------------------------------|
| 790       | 0.019      | 2013 Quantitative analysis of anaerobic oxidation of methane (AOM) in marine sediments=A modeling perspective |
| 790       | 0.025      | 2013 Quantitative analysis of anaerobic oxidation of methane (AOM) in marine sediments=A modeling perspective |
| 777       | 0.03       | 2013 Quantitative analysis of anaerobic oxidation of methane (AOM) in marine sediments=A modeling perspective |
| 775       | 0.035      | 2013 Quantitative analysis of anaerobic oxidation of methane (AOM) in marine sediments=A modeling perspective |
| 1000      | 0.035      | 2013 Quantitative analysis of anaerobic oxidation of methane (AOM) in marine sediments=A modeling perspective |
| 210       | 0.05       | 2014 Iron-Mediated Anaerobic Oxidation of Methane in Brackish Coastal Sediments <sup>17</sup>                 |
| 775       | 0.05       | 2013 Quantitative analysis of anaerobic oxidation of methane (AOM) in marine sediments=A modeling perspective |

|       |       |                                                                                                               |
|-------|-------|---------------------------------------------------------------------------------------------------------------|
| 790   | 0.05  | 2013 Quantitative analysis of anaerobic oxidation of methane (AOM) in marine sediments=A modeling perspective |
| 1005  | 0.05  | 2018 Global diffusive fluxes of methane in marine sediments                                                   |
| 214   | 0.07  | 2018 Global diffusive fluxes of methane in marine sediments                                                   |
| 332   | 0.08  | 2018 Global diffusive fluxes of methane in marine sediments                                                   |
| 225   | 0.1   | 2018 Global diffusive fluxes of methane in marine sediments                                                   |
| 900   | 0.1   | 2005 Microbial methane turnover in different marine habitats <sup>7</sup>                                     |
| 225   | 0.12  | 2013 Quantitative analysis of anaerobic oxidation of methane (AOM) in marine sediments=A modeling perspective |
| 777   | 0.125 | 2013 Quantitative analysis of anaerobic oxidation of methane (AOM) in marine sediments=A modeling perspective |
| 1720  | 0.14  | 2013 Quantitative analysis of anaerobic oxidation of methane (AOM) in marine sediments=A modeling perspective |
| 900   | 0.15  | 2005 Microbial methane turnover in different marine habitats                                                  |
| 225   | 0.18  | 2013 Quantitative analysis of anaerobic oxidation of methane (AOM) in marine sediments=A modeling perspective |
| 204   | 0.2   | 2018 Global diffusive fluxes of methane in marine sediments                                                   |
| 214   | 0.2   | 2018 Global diffusive fluxes of methane in marine sediments                                                   |
| 900   | 0.3   | 2005 Microbial methane turnover in different marine habitats                                                  |
| 1305  | 0.3   | 2018 Global diffusive fluxes of methane in marine sediments                                                   |
| 900   | 0.4   | 2005 Microbial methane turnover in different marine habitats                                                  |
| 241   | 0.5   | 2018 Global diffusive fluxes of methane in marine sediments                                                   |
| 1008  | 0.5   | 2018 Global diffusive fluxes of methane in marine sediments                                                   |
| 1296  | 0.5   | 2018 Global diffusive fluxes of methane in marine sediments                                                   |
| 333   | 0.6   | 2018 Global diffusive fluxes of methane in marine sediments                                                   |
| 1400  | 0.6   | 2018 Global diffusive fluxes of methane in marine sediments                                                   |
| 1400  | 0.6   | 2018 Global diffusive fluxes of methane in marine sediments                                                   |
| 308.7 | 0.7   | 2018 Global diffusive fluxes of methane in marine sediments                                                   |
| 407   | 0.7   | 2018 Global diffusive fluxes of methane in marine sediments                                                   |
| 397   | 0.8   | 2018 Global diffusive fluxes of methane in marine sediments                                                   |
| 1210  | 0.8   | 2018 Global diffusive fluxes of methane in marine sediments                                                   |
| 222   | 0.9   | 2018 Global diffusive fluxes of methane in marine sediments                                                   |
| 269   | 0.9   | 2018 Global diffusive fluxes of methane in marine sediments                                                   |
| 386   | 0.9   | 2018 Global diffusive fluxes of methane in marine sediments                                                   |
| 782   | 0.9   | 2018 Global diffusive fluxes of methane in marine sediments                                                   |
| 923   | 0.9   | 2018 Global diffusive fluxes of methane in marine sediments                                                   |
| 265.8 | 1     | 2018 Global diffusive fluxes of methane in marine sediments                                                   |
| 280   | 1     | 2018 Global diffusive fluxes of methane in marine sediments                                                   |
| 280   | 1     | 2018 Global diffusive fluxes of methane in marine sediments                                                   |
| 361   | 1     | 2013 Quantitative analysis of anaerobic oxidation of methane (AOM) in marine sediments=A modeling perspective |
| 391.1 | 1.1   | 2018 Global diffusive fluxes of methane in marine sediments                                                   |
| 542   | 1.1   | 2018 Global diffusive fluxes of methane in marine sediments                                                   |
| 1018  | 1.1   | 2018 Global diffusive fluxes of methane in marine sediments                                                   |
| 1205  | 1.1   | 2018 Global diffusive fluxes of methane in marine sediments                                                   |
| 1307  | 1.1   | 2018 Global diffusive fluxes of methane in marine sediments                                                   |
| 1450  | 1.1   | 2018 Global diffusive fluxes of methane in marine sediments                                                   |
| 223   | 1.2   | 2018 Global diffusive fluxes of methane in marine sediments                                                   |
| 354.2 | 1.2   | 2018 Global diffusive fluxes of methane in marine sediments                                                   |
| 590   | 1.2   | 2018 Global diffusive fluxes of methane in marine sediments                                                   |

|      |     |                                                                                                               |
|------|-----|---------------------------------------------------------------------------------------------------------------|
| 590  | 1.2 | 2018 Global diffusive fluxes of methane in marine sediments                                                   |
| 659  | 1.2 | 2018 Global diffusive fluxes of methane in marine sediments                                                   |
| 342  | 1.3 | 2018 Global diffusive fluxes of methane in marine sediments                                                   |
| 590  | 1.3 | 2018 Global diffusive fluxes of methane in marine sediments                                                   |
| 590  | 1.3 | 2018 Global diffusive fluxes of methane in marine sediments                                                   |
| 590  | 1.3 | 2018 Global diffusive fluxes of methane in marine sediments                                                   |
| 879  | 1.3 | 2018 Global diffusive fluxes of methane in marine sediments                                                   |
| 902  | 1.3 | 2018 Global diffusive fluxes of methane in marine sediments                                                   |
| 1198 | 1.3 | 2018 Global diffusive fluxes of methane in marine sediments                                                   |
| 1992 | 1.3 | 2018 Global diffusive fluxes of methane in marine sediments                                                   |
| 342  | 1.4 | 2018 Global diffusive fluxes of methane in marine sediments                                                   |
| 1020 | 1.4 | 2013 Quantitative analysis of anaerobic oxidation of methane (AOM) in marine sediments=A modeling perspective |
| 1168 | 1.4 | 2018 Global diffusive fluxes of methane in marine sediments                                                   |
| 276  | 1.6 | 2018 Global diffusive fluxes of methane in marine sediments                                                   |
| 374  | 1.6 | 2018 Global diffusive fluxes of methane in marine sediments                                                   |
| 633  | 1.6 | 2018 Global diffusive fluxes of methane in marine sediments                                                   |
| 633  | 1.6 | 2018 Global diffusive fluxes of methane in marine sediments                                                   |
| 1970 | 1.6 | 2018 Global diffusive fluxes of methane in marine sediments                                                   |
| 2000 | 1.6 | 2018 Global diffusive fluxes of methane in marine sediments                                                   |
| 209  | 1.7 | 2018 Global diffusive fluxes of methane in marine sediments                                                   |
| 897  | 1.7 | 2018 Global diffusive fluxes of methane in marine sediments                                                   |
| 1014 | 1.7 | 2018 Global diffusive fluxes of methane in marine sediments                                                   |
| 205  | 1.8 | 2018 Global diffusive fluxes of methane in marine sediments                                                   |
| 408  | 1.8 | 2018 Global diffusive fluxes of methane in marine sediments                                                   |
| 460  | 1.8 | 2018 Global diffusive fluxes of methane in marine sediments                                                   |
| 587  | 1.8 | 2018 Global diffusive fluxes of methane in marine sediments                                                   |
| 758  | 1.8 | 2018 Global diffusive fluxes of methane in marine sediments                                                   |
| 1686 | 1.8 | 2018 Global diffusive fluxes of methane in marine sediments                                                   |
| 501  | 1.9 | 2018 Global diffusive fluxes of methane in marine sediments                                                   |
| 647  | 1.9 | 2018 Global diffusive fluxes of methane in marine sediments                                                   |
| 1304 | 1.9 | 2018 Global diffusive fluxes of methane in marine sediments                                                   |
| 1534 | 1.9 | 2018 Global diffusive fluxes of methane in marine sediments                                                   |
| 667  | 2   | 2018 Global diffusive fluxes of methane in marine sediments                                                   |
| 700  | 2   | 2018 Global diffusive fluxes of methane in marine sediments                                                   |
| 2000 | 2   | 2018 Global diffusive fluxes of methane in marine sediments                                                   |
| 1022 | 2.1 | 2018 Global diffusive fluxes of methane in marine sediments                                                   |
| 1196 | 2.1 | 2018 Global diffusive fluxes of methane in marine sediments                                                   |
| 377  | 2.2 | 2018 Global diffusive fluxes of methane in marine sediments                                                   |
| 616  | 2.2 | 2018 Global diffusive fluxes of methane in marine sediments                                                   |
| 1267 | 2.2 | 2018 Global diffusive fluxes of methane in marine sediments                                                   |
| 396  | 2.4 | 2018 Global diffusive fluxes of methane in marine sediments                                                   |
| 1284 | 2.4 | 2018 Global diffusive fluxes of methane in marine sediments                                                   |
| 1302 | 2.4 | 2018 Global diffusive fluxes of methane in marine sediments                                                   |
| 396  | 2.5 | 2013 Quantitative analysis of anaerobic oxidation of methane (AOM) in marine sediments=A modeling perspective |
| 647  | 2.5 | 2018 Global diffusive fluxes of methane in marine sediments                                                   |
| 1700 | 2.5 | 2013 Quantitative analysis of anaerobic oxidation of methane (AOM) in marine sediments=A modeling perspective |

|      |      |                                                                                                               |
|------|------|---------------------------------------------------------------------------------------------------------------|
| 1828 | 2.5  | 2018 Global diffusive fluxes of methane in marine sediments                                                   |
| 685  | 2.6  | 2018 Global diffusive fluxes of methane in marine sediments                                                   |
| 275  | 2.7  | 2018 Global diffusive fluxes of methane in marine sediments                                                   |
| 690  | 2.7  | 2018 Global diffusive fluxes of methane in marine sediments                                                   |
| 713  | 2.7  | 2013 Quantitative analysis of anaerobic oxidation of methane (AOM) in marine sediments=A modeling perspective |
| 1282 | 2.7  | 2018 Global diffusive fluxes of methane in marine sediments                                                   |
| 1292 | 2.7  | 2018 Global diffusive fluxes of methane in marine sediments                                                   |
| 374  | 2.8  | 2018 Global diffusive fluxes of methane in marine sediments                                                   |
| 907  | 2.8  | 2018 Global diffusive fluxes of methane in marine sediments                                                   |
| 685  | 2.85 | 2013 Quantitative analysis of anaerobic oxidation of methane (AOM) in marine sediments=A modeling perspective |
| 647  | 3    | 2013 Quantitative analysis of anaerobic oxidation of methane (AOM) in marine sediments=A modeling perspective |
| 785  | 3.2  | 2018 Global diffusive fluxes of methane in marine sediments                                                   |
| 998  | 3.2  | 2018 Global diffusive fluxes of methane in marine sediments                                                   |
| 1157 | 3.2  | 2018 Global diffusive fluxes of methane in marine sediments                                                   |
| 686  | 3.3  | 2018 Global diffusive fluxes of methane in marine sediments                                                   |
| 890  | 3.3  | 2018 Global diffusive fluxes of methane in marine sediments                                                   |
| 1045 | 3.3  | 2018 Global diffusive fluxes of methane in marine sediments                                                   |
| 919  | 3.4  | 2018 Global diffusive fluxes of methane in marine sediments                                                   |
| 951  | 3.4  | 2018 Global diffusive fluxes of methane in marine sediments                                                   |
| 1274 | 3.4  | 2018 Global diffusive fluxes of methane in marine sediments                                                   |
| 1300 | 3.4  | 2018 Global diffusive fluxes of methane in marine sediments                                                   |
| 1306 | 3.4  | 2018 Global diffusive fluxes of methane in marine sediments                                                   |
| 1373 | 3.4  | 2018 Global diffusive fluxes of methane in marine sediments                                                   |
| 1090 | 3.5  | 2018 Global diffusive fluxes of methane in marine sediments                                                   |
| 1176 | 3.5  | 2013 Quantitative analysis of anaerobic oxidation of methane (AOM) in marine sediments=A modeling perspective |
| 1373 | 3.5  | 2013 Quantitative analysis of anaerobic oxidation of methane (AOM) in marine sediments=A modeling perspective |
| 790  | 3.6  | 2018 Global diffusive fluxes of methane in marine sediments                                                   |
| 791  | 3.6  | 2018 Global diffusive fluxes of methane in marine sediments                                                   |
| 1000 | 3.6  | 2018 Global diffusive fluxes of methane in marine sediments                                                   |
| 1015 | 3.6  | 2018 Global diffusive fluxes of methane in marine sediments                                                   |
| 1100 | 3.6  | 2018 Global diffusive fluxes of methane in marine sediments                                                   |
| 799  | 3.7  | 2018 Global diffusive fluxes of methane in marine sediments                                                   |
| 1328 | 3.7  | 2018 Global diffusive fluxes of methane in marine sediments                                                   |
| 1400 | 3.7  | 2018 Global diffusive fluxes of methane in marine sediments                                                   |
| 2000 | 3.7  | 2018 Global diffusive fluxes of methane in marine sediments                                                   |
| 771  | 3.8  | 2013 Quantitative analysis of anaerobic oxidation of methane (AOM) in marine sediments=A modeling perspective |
| 1503 | 3.8  | 2018 Global diffusive fluxes of methane in marine sediments                                                   |
| 500  | 3.9  | 2018 Global diffusive fluxes of methane in marine sediments                                                   |
| 306  | 4.1  | 2018 Global diffusive fluxes of methane in marine sediments                                                   |
| 1005 | 4.1  | 2018 Global diffusive fluxes of methane in marine sediments                                                   |
| 1023 | 4.1  | 2018 Global diffusive fluxes of methane in marine sediments                                                   |
| 1472 | 4.2  | 2018 Global diffusive fluxes of methane in marine sediments                                                   |
| 1980 | 4.2  | 2018 Global diffusive fluxes of methane in marine sediments                                                   |
| 2000 | 4.2  | 2018 Global diffusive fluxes of methane in marine sediments                                                   |

|      |      |                                                                                                               |
|------|------|---------------------------------------------------------------------------------------------------------------|
| 1186 | 4.3  | 2018 Global diffusive fluxes of methane in marine sediments                                                   |
| 728  | 4.4  | 2018 Global diffusive fluxes of methane in marine sediments                                                   |
| 1224 | 4.4  | 2018 Global diffusive fluxes of methane in marine sediments                                                   |
| 1176 | 4.5  | 2018 Global diffusive fluxes of methane in marine sediments                                                   |
| 316  | 4.6  | 2018 Global diffusive fluxes of methane in marine sediments                                                   |
| 1105 | 4.7  | 2018 Global diffusive fluxes of methane in marine sediments                                                   |
| 1219 | 4.8  | 2018 Global diffusive fluxes of methane in marine sediments                                                   |
| 1566 | 4.8  | 2018 Global diffusive fluxes of methane in marine sediments                                                   |
| 1008 | 5    | 2018 Global diffusive fluxes of methane in marine sediments                                                   |
| 238  | 5.1  | 2018 Global diffusive fluxes of methane in marine sediments                                                   |
| 2000 | 5.1  | 2018 Global diffusive fluxes of methane in marine sediments                                                   |
| 1327 | 5.2  | 2018 Global diffusive fluxes of methane in marine sediments                                                   |
| 1076 | 5.3  | 2018 Global diffusive fluxes of methane in marine sediments                                                   |
| 1076 | 5.3  | 2018 Global diffusive fluxes of methane in marine sediments                                                   |
| 575  | 5.4  | 2018 Global diffusive fluxes of methane in marine sediments                                                   |
| 1000 | 5.5  | 2018 Global diffusive fluxes of methane in marine sediments                                                   |
| 800  | 5.6  | 2018 Global diffusive fluxes of methane in marine sediments                                                   |
| 1000 | 5.7  | 2018 Global diffusive fluxes of methane in marine sediments                                                   |
| 639  | 6    | 2018 Global diffusive fluxes of methane in marine sediments                                                   |
| 1013 | 6    | 2018 Global diffusive fluxes of methane in marine sediments                                                   |
| 825  | 6.1  | 2018 Global diffusive fluxes of methane in marine sediments                                                   |
| 1326 | 6.1  | 2018 Global diffusive fluxes of methane in marine sediments                                                   |
| 1312 | 6.2  | 2018 Global diffusive fluxes of methane in marine sediments                                                   |
| 647  | 6.7  | 2018 Global diffusive fluxes of methane in marine sediments                                                   |
| 1774 | 6.8  | 2018 Global diffusive fluxes of methane in marine sediments                                                   |
| 881  | 7.6  | 2018 Global diffusive fluxes of methane in marine sediments                                                   |
| 1045 | 7.6  | 2018 Global diffusive fluxes of methane in marine sediments                                                   |
| 861  | 7.8  | 2018 Global diffusive fluxes of methane in marine sediments                                                   |
| 1000 | 7.9  | 2018 Global diffusive fluxes of methane in marine sediments                                                   |
| 1981 | 8    | 2018 Global diffusive fluxes of methane in marine sediments                                                   |
| 822  | 8.1  | 2018 Global diffusive fluxes of methane in marine sediments                                                   |
| 1308 | 8.1  | 2018 Global diffusive fluxes of methane in marine sediments                                                   |
| 1956 | 8.1  | 2018 Global diffusive fluxes of methane in marine sediments                                                   |
| 1969 | 8.3  | 2018 Global diffusive fluxes of methane in marine sediments                                                   |
| 1607 | 8.4  | 2018 Global diffusive fluxes of methane in marine sediments                                                   |
| 907  | 8.5  | 2018 Global diffusive fluxes of methane in marine sediments                                                   |
| 1937 | 8.9  | 2018 Global diffusive fluxes of methane in marine sediments                                                   |
| 900  | 9.5  | 2018 Global diffusive fluxes of methane in marine sediments                                                   |
| 950  | 9.7  | 2018 Global diffusive fluxes of methane in marine sediments                                                   |
| 613  | 9.8  | 2018 Global diffusive fluxes of methane in marine sediments                                                   |
| 613  | 9.8  | 2013 Quantitative analysis of anaerobic oxidation of methane (AOM) in marine sediments=A modeling perspective |
| 1093 | 9.8  | 2018 Global diffusive fluxes of methane in marine sediments                                                   |
| 1340 | 9.9  | 2018 Global diffusive fluxes of methane in marine sediments                                                   |
| 1186 | 10.1 | 2018 Global diffusive fluxes of methane in marine sediments                                                   |
| 489  | 10.2 | 2018 Global diffusive fluxes of methane in marine sediments                                                   |
| 1350 | 10.2 | 2018 Global diffusive fluxes of methane in marine sediments                                                   |

|      |      |                                                             |
|------|------|-------------------------------------------------------------|
| 1309 | 10.3 | 2018 Global diffusive fluxes of methane in marine sediments |
| 1873 | 10.4 | 2018 Global diffusive fluxes of methane in marine sediments |
| 846  | 10.8 | 2018 Global diffusive fluxes of methane in marine sediments |
| 1165 | 11.1 | 2018 Global diffusive fluxes of methane in marine sediments |
| 838  | 11.3 | 2018 Global diffusive fluxes of methane in marine sediments |
| 427  | 12.4 | 2018 Global diffusive fluxes of methane in marine sediments |
| 522  | 12.5 | 2018 Global diffusive fluxes of methane in marine sediments |
| 1430 | 13   | 2018 Global diffusive fluxes of methane in marine sediments |
| 955  | 13.3 | 2018 Global diffusive fluxes of methane in marine sediments |
| 1963 | 13.3 | 2018 Global diffusive fluxes of methane in marine sediments |
| 993  | 13.8 | 2018 Global diffusive fluxes of methane in marine sediments |
| 447  | 14.4 | 2018 Global diffusive fluxes of methane in marine sediments |
| 397  | 14.7 | 2018 Global diffusive fluxes of methane in marine sediments |
| 1108 | 14.8 | 2018 Global diffusive fluxes of methane in marine sediments |
| 1691 | 14.8 | 2018 Global diffusive fluxes of methane in marine sediments |
| 348  | 15.6 | 2018 Global diffusive fluxes of methane in marine sediments |
| 1074 | 15.6 | 2018 Global diffusive fluxes of methane in marine sediments |
| 1146 | 16.7 | 2018 Global diffusive fluxes of methane in marine sediments |
| 1038 | 17   | 2018 Global diffusive fluxes of methane in marine sediments |
| 1100 | 17.1 | 2018 Global diffusive fluxes of methane in marine sediments |
| 1429 | 17.4 | 2018 Global diffusive fluxes of methane in marine sediments |
| 685  | 17.7 | 2018 Global diffusive fluxes of methane in marine sediments |
| 730  | 17.9 | 2018 Global diffusive fluxes of methane in marine sediments |
| 1037 | 18   | 2018 Global diffusive fluxes of methane in marine sediments |
| 1100 | 18.5 | 2018 Global diffusive fluxes of methane in marine sediments |
| 1480 | 18.5 | 2018 Global diffusive fluxes of methane in marine sediments |
| 1773 | 18.8 | 2018 Global diffusive fluxes of methane in marine sediments |
| 1564 | 19.1 | 2018 Global diffusive fluxes of methane in marine sediments |
| 1364 | 19.5 | 2018 Global diffusive fluxes of methane in marine sediments |
| 2000 | 19.5 | 2018 Global diffusive fluxes of methane in marine sediments |
| 1279 | 20.4 | 2018 Global diffusive fluxes of methane in marine sediments |
| 479  | 21.6 | 2018 Global diffusive fluxes of methane in marine sediments |
| 556  | 21.7 | 2018 Global diffusive fluxes of methane in marine sediments |
| 1404 | 22   | 2018 Global diffusive fluxes of methane in marine sediments |
| 1470 | 22   | 2018 Global diffusive fluxes of methane in marine sediments |
| 565  | 22.5 | 2018 Global diffusive fluxes of methane in marine sediments |
| 895  | 23.2 | 2018 Global diffusive fluxes of methane in marine sediments |
| 808  | 24.4 | 2018 Global diffusive fluxes of methane in marine sediments |
| 1062 | 26.1 | 2018 Global diffusive fluxes of methane in marine sediments |
| 913  | 26.4 | 2018 Global diffusive fluxes of methane in marine sediments |
| 1809 | 26.7 | 2018 Global diffusive fluxes of methane in marine sediments |
| 902  | 26.8 | 2018 Global diffusive fluxes of methane in marine sediments |
| 1010 | 29   | 2018 Global diffusive fluxes of methane in marine sediments |
| 1018 | 29   | 2018 Global diffusive fluxes of methane in marine sediments |
| 1927 | 30   | 2018 Global diffusive fluxes of methane in marine sediments |
| 427  | 30.8 | 2018 Global diffusive fluxes of methane in marine sediments |
| 1672 | 31.5 | 2018 Global diffusive fluxes of methane in marine sediments |

|      |       |                                                                                                               |
|------|-------|---------------------------------------------------------------------------------------------------------------|
| 1742 | 31.7  | 2018 Global diffusive fluxes of methane in marine sediments                                                   |
| 1060 | 34.3  | 2018 Global diffusive fluxes of methane in marine sediments                                                   |
| 471  | 34.6  | 2018 Global diffusive fluxes of methane in marine sediments                                                   |
| 593  | 38.9  | 2018 Global diffusive fluxes of methane in marine sediments                                                   |
| 1713 | 41.8  | 2018 Global diffusive fluxes of methane in marine sediments                                                   |
| 428  | 42.8  | 2018 Global diffusive fluxes of methane in marine sediments                                                   |
| 808  | 43.2  | 2018 Global diffusive fluxes of methane in marine sediments                                                   |
| 1638 | 43.2  | 2018 Global diffusive fluxes of methane in marine sediments                                                   |
| 1984 | 44.1  | 2018 Global diffusive fluxes of methane in marine sediments                                                   |
| 1303 | 46    | 2018 Global diffusive fluxes of methane in marine sediments                                                   |
| 278  | 49.8  | 2018 Global diffusive fluxes of methane in marine sediments                                                   |
| 800  | 50    | 2007 Rates of methanogenesis and methanotrophy deep-sea sediments <sup>18</sup>                               |
| 794  | 50.3  | 2018 Global diffusive fluxes of methane in marine sediments                                                   |
| 738  | 51.7  | 2018 Global diffusive fluxes of methane in marine sediments                                                   |
| 915  | 53.5  | 2018 Global diffusive fluxes of methane in marine sediments                                                   |
| 307  | 55    | 2018 Global diffusive fluxes of methane in marine sediments                                                   |
| 1414 | 65.5  | 2018 Global diffusive fluxes of methane in marine sediments                                                   |
| 1320 | 67.3  | 2018 Global diffusive fluxes of methane in marine sediments                                                   |
| 419  | 74.1  | 2018 Global diffusive fluxes of methane in marine sediments                                                   |
| 1372 | 74.4  | 2018 Global diffusive fluxes of methane in marine sediments                                                   |
| 1428 | 78.3  | 2018 Global diffusive fluxes of methane in marine sediments                                                   |
| 1869 | 79.6  | 2018 Global diffusive fluxes of methane in marine sediments                                                   |
| 1057 | 84.2  | 2018 Global diffusive fluxes of methane in marine sediments                                                   |
| 1945 | 97.8  | 2018 Global diffusive fluxes of methane in marine sediments                                                   |
| 1274 | 99.1  | 2018 Global diffusive fluxes of methane in marine sediments                                                   |
| 1649 | 101.9 | 2018 Global diffusive fluxes of methane in marine sediments                                                   |
| 1983 | 117.5 | 2018 Global diffusive fluxes of methane in marine sediments                                                   |
| 312  | 119   | 2018 Global diffusive fluxes of methane in marine sediments                                                   |
| 1650 | 125   | 2013 Quantitative analysis of anaerobic oxidation of methane (AOM) in marine sediments=A modeling perspective |
| 213  | 134.3 | 2018 Global diffusive fluxes of methane in marine sediments                                                   |
| 948  | 147.9 | 2018 Global diffusive fluxes of methane in marine sediments                                                   |
| 781  | 159.3 | 2018 Global diffusive fluxes of methane in marine sediments                                                   |
| 440  | 169.9 | 2018 Global diffusive fluxes of methane in marine sediments                                                   |
| 1123 | 178.7 | 2018 Global diffusive fluxes of methane in marine sediments                                                   |
| 796  | 180.3 | 2018 Global diffusive fluxes of methane in marine sediments                                                   |
| 1149 | 195   | 2018 Global diffusive fluxes of methane in marine sediments                                                   |
| 1066 | 205   | 2018 Global diffusive fluxes of methane in marine sediments                                                   |
| 1365 | 208.9 | 2018 Global diffusive fluxes of methane in marine sediments                                                   |
| 658  | 209.5 | 2018 Global diffusive fluxes of methane in marine sediments                                                   |
| 1368 | 282   | 2018 Global diffusive fluxes of methane in marine sediments                                                   |
| 1305 | 349.7 | 2018 Global diffusive fluxes of methane in marine sediments                                                   |
| 1209 | 374.8 | 2018 Global diffusive fluxes of methane in marine sediments                                                   |
| 416  | 380.9 | 2018 Global diffusive fluxes of methane in marine sediments                                                   |
| 1970 | 562.5 | 2018 Global diffusive fluxes of methane in marine sediments                                                   |
| 647  | 711.4 | 2018 Global diffusive fluxes of methane in marine sediments                                                   |
| 1345 | 783.5 | 2018 Global diffusive fluxes of methane in marine sediments                                                   |

|     |     |                                                                                                            |
|-----|-----|------------------------------------------------------------------------------------------------------------|
| 391 | 0.5 | 2008 Thermodynamic and kinetic control on anaerobic oxidation of methane in marine sediments <sup>19</sup> |
| 205 | 0.2 | 2008 Thermodynamic and kinetic control on anaerobic oxidation of methane in marine sediments               |
| 325 | 0.1 | 2008 Thermodynamic and kinetic control on anaerobic oxidation of methane in marine sediments               |

#### Rise, 2000-3500 m

| Depth [m] | SMT [mbsf] | Reference                                                                                                                                                                           |
|-----------|------------|-------------------------------------------------------------------------------------------------------------------------------------------------------------------------------------|
| 2070      | 0.02       | 2013 Quantitative analysis of anaerobic oxidation of methane (AOM) in marine sediments=A modeling perspective                                                                       |
| 2085      | 0.025      | 2013 Quantitative analysis of anaerobic oxidation of methane (AOM) in marine sediments=A modeling perspective                                                                       |
| 2089      | 0.035      | 2018 Global diffusive fluxes of methane in marine sediments                                                                                                                         |
| 2085      | 0.05       | 2018 Global diffusive fluxes of methane in marine sediments                                                                                                                         |
| 3100      | 0.6        | 2018 Global diffusive fluxes of methane in marine sediments                                                                                                                         |
| 2160      | 1          | 2018 Global diffusive fluxes of methane in marine sediments                                                                                                                         |
| 2911      | 1          | 2018 Global diffusive fluxes of methane in marine sediments                                                                                                                         |
| 2196      | 1.4        | 2018 Global diffusive fluxes of methane in marine sediments                                                                                                                         |
| 2861      | 1.4        | 2018 Global diffusive fluxes of methane in marine sediments                                                                                                                         |
| 2161      | 1.5        | 2018 Global diffusive fluxes of methane in marine sediments                                                                                                                         |
| 3525      | 2          | 2003 Control of sulfate pore-water profiles by sedimentary events and the significance of anaerobic oxidation of methane for the burial of sulfur in marine sediments <sup>20</sup> |
| 2744      | 2          | 2018 Global diffusive fluxes of methane in marine sediments                                                                                                                         |
| 2010      | 2.1        | 2018 Global diffusive fluxes of methane in marine sediments                                                                                                                         |
| 2772      | 2.1        | 2018 Global diffusive fluxes of methane in marine sediments                                                                                                                         |
| 3361      | 2.3        | 2018 Global diffusive fluxes of methane in marine sediments                                                                                                                         |
| 3100      | 2.7        | 2018 Global diffusive fluxes of methane in marine sediments                                                                                                                         |
| 3100      | 3.3        | 2018 Global diffusive fluxes of methane in marine sediments                                                                                                                         |
| 2300      | 5          | 2018 Global diffusive fluxes of methane in marine sediments                                                                                                                         |
| 2797      | 5          | 2018 Global diffusive fluxes of methane in marine sediments                                                                                                                         |
| 2750      | 5.4        | 2018 Global diffusive fluxes of methane in marine sediments                                                                                                                         |
| 2750      | 5.4        | 2018 Global diffusive fluxes of methane in marine sediments                                                                                                                         |
| 3169      | 5.4        | 2018 Global diffusive fluxes of methane in marine sediments                                                                                                                         |
| 2166      | 5.6        | 2018 Global diffusive fluxes of methane in marine sediments                                                                                                                         |
| 3446      | 5.6        | 2018 Global diffusive fluxes of methane in marine sediments                                                                                                                         |
| 2593      | 5.7        | 2018 Global diffusive fluxes of methane in marine sediments                                                                                                                         |
| 2065      | 5.8        | 2018 Global diffusive fluxes of methane in marine sediments                                                                                                                         |
| 3100      | 5.8        | 2018 Global diffusive fluxes of methane in marine sediments                                                                                                                         |
| 3476      | 5.8        | 2018 Global diffusive fluxes of methane in marine sediments                                                                                                                         |
| 2065      | 5.8        | 2013 Quantitative analysis of anaerobic oxidation of methane (AOM) in marine sediments=A modeling perspective                                                                       |
| 2141      | 6.1        | 2018 Global diffusive fluxes of methane in marine sediments                                                                                                                         |
| 2766      | 6.2        | 2018 Global diffusive fluxes of methane in marine sediments                                                                                                                         |
| 2170      | 7.2        | 2018 Global diffusive fluxes of methane in marine sediments                                                                                                                         |
| 2750      | 7.3        | 2018 Global diffusive fluxes of methane in marine sediments                                                                                                                         |
| 2750      | 8.1        | 2018 Global diffusive fluxes of methane in marine sediments                                                                                                                         |
| 2751      | 8.1        | 2018 Global diffusive fluxes of methane in marine sediments                                                                                                                         |
| 2571      | 8.3        | 2018 Global diffusive fluxes of methane in marine sediments                                                                                                                         |
| 3178      | 8.3        | 2018 Global diffusive fluxes of methane in marine sediments                                                                                                                         |
| 2160      | 9.1        | 2018 Global diffusive fluxes of methane in marine sediments                                                                                                                         |

|      |      |                                                                                                                                 |
|------|------|---------------------------------------------------------------------------------------------------------------------------------|
| 2015 | 9.2  | 2018 Global diffusive fluxes of methane in marine sediments                                                                     |
| 3215 | 9.5  | 2018 Global diffusive fluxes of methane in marine sediments                                                                     |
| 2681 | 9.9  | 2018 Global diffusive fluxes of methane in marine sediments                                                                     |
| 2997 | 10.1 | 2018 Global diffusive fluxes of methane in marine sediments                                                                     |
| 2982 | 10.2 | 2018 Global diffusive fluxes of methane in marine sediments                                                                     |
| 3226 | 10.4 | 2018 Global diffusive fluxes of methane in marine sediments                                                                     |
| 3346 | 11.5 | 2018 Global diffusive fluxes of methane in marine sediments                                                                     |
| 2037 | 11.6 | 2018 Global diffusive fluxes of methane in marine sediments                                                                     |
| 2138 | 11.7 | 2018 Global diffusive fluxes of methane in marine sediments                                                                     |
| 3137 | 12   | 2018 Global diffusive fluxes of methane in marine sediments                                                                     |
| 2171 | 12.1 | 2018 Global diffusive fluxes of methane in marine sediments                                                                     |
| 3493 | 12.2 | 2018 Global diffusive fluxes of methane in marine sediments                                                                     |
| 2998 | 12.4 | 2018 Global diffusive fluxes of methane in marine sediments                                                                     |
| 2066 | 12.8 | 2018 Global diffusive fluxes of methane in marine sediments                                                                     |
| 2147 | 12.9 | 2018 Global diffusive fluxes of methane in marine sediments                                                                     |
| 3084 | 13.2 | 2018 Global diffusive fluxes of methane in marine sediments                                                                     |
| 3028 | 13.3 | 2018 Global diffusive fluxes of methane in marine sediments                                                                     |
| 2470 | 13.6 | 2018 Global diffusive fluxes of methane in marine sediments                                                                     |
| 2153 | 14   | 2018 Global diffusive fluxes of methane in marine sediments                                                                     |
| 2791 | 14.1 | 2018 Global diffusive fluxes of methane in marine sediments                                                                     |
| 2996 | 14.3 | 2018 Global diffusive fluxes of methane in marine sediments                                                                     |
| 2190 | 14.6 | 2018 Global diffusive fluxes of methane in marine sediments                                                                     |
| 2595 | 15.2 | 2018 Global diffusive fluxes of methane in marine sediments                                                                     |
| 2544 | 15.3 | 2018 Global diffusive fluxes of methane in marine sediments                                                                     |
| 2052 | 15.5 | 2018 Global diffusive fluxes of methane in marine sediments                                                                     |
| 2681 | 16.2 | 2018 Global diffusive fluxes of methane in marine sediments                                                                     |
| 2198 | 16.8 | 2018 Global diffusive fluxes of methane in marine sediments                                                                     |
| 2178 | 17.1 | 2018 Global diffusive fluxes of methane in marine sediments                                                                     |
| 2750 | 17.1 | 2018 Global diffusive fluxes of methane in marine sediments                                                                     |
| 3306 | 17.1 | 2018 Global diffusive fluxes of methane in marine sediments                                                                     |
| 2073 | 18.2 | 2018 Global diffusive fluxes of methane in marine sediments                                                                     |
| 2627 | 18.8 | 2018 Global diffusive fluxes of methane in marine sediments                                                                     |
| 3021 | 18.9 | 2018 Global diffusive fluxes of methane in marine sediments                                                                     |
| 2194 | 19.6 | 2018 Global diffusive fluxes of methane in marine sediments                                                                     |
| 2764 | 19.9 | 2018 Global diffusive fluxes of methane in marine sediments                                                                     |
| 2500 | 21   | 2013 Quantitative analysis of anaerobic oxidation of methane (AOM) in marine sediments=A modeling perspective                   |
| 2380 | 21.7 | 2018 Global diffusive fluxes of methane in marine sediments                                                                     |
| 2779 | 21.8 | 2018 Global diffusive fluxes of methane in marine sediments                                                                     |
| 2770 | 22   | 2018 Global diffusive fluxes of methane in marine sediments                                                                     |
| 2799 | 22   | 2018 Global diffusive fluxes of methane in marine sediments                                                                     |
| 2519 | 22.6 | 2018 Global diffusive fluxes of methane in marine sediments                                                                     |
| 2500 | 22.7 | 2000 Significance of anaerobic methane oxidation in methane-rich sediments overlying the Blake Ridge gas hydrates <sup>21</sup> |
| 2642 | 23.4 | 2018 Global diffusive fluxes of methane in marine sediments                                                                     |
| 2181 | 23.8 | 2018 Global diffusive fluxes of methane in marine sediments                                                                     |
| 2653 | 26.2 | 2018 Global diffusive fluxes of methane in marine sediments                                                                     |
| 3089 | 26.8 | 2018 Global diffusive fluxes of methane in marine sediments                                                                     |

|      |       |                                                                                                                             |
|------|-------|-----------------------------------------------------------------------------------------------------------------------------|
| 2414 | 28.6  | 2018 Global diffusive fluxes of methane in marine sediments                                                                 |
| 2178 | 29.8  | 2018 Global diffusive fluxes of methane in marine sediments                                                                 |
| 2006 | 29.9  | 2018 Global diffusive fluxes of methane in marine sediments                                                                 |
| 2996 | 30.3  | 2018 Global diffusive fluxes of methane in marine sediments                                                                 |
| 3191 | 31.8  | 2018 Global diffusive fluxes of methane in marine sediments                                                                 |
| 3429 | 32.9  | 2018 Global diffusive fluxes of methane in marine sediments                                                                 |
| 2698 | 36.1  | 2018 Global diffusive fluxes of methane in marine sediments                                                                 |
| 2568 | 36.5  | 2018 Global diffusive fluxes of methane in marine sediments                                                                 |
| 2593 | 41.1  | 2018 Global diffusive fluxes of methane in marine sediments                                                                 |
| 2022 | 44.9  | 2018 Global diffusive fluxes of methane in marine sediments                                                                 |
| 3152 | 48    | 2018 Global diffusive fluxes of methane in marine sediments                                                                 |
| 2578 | 50.8  | 2018 Global diffusive fluxes of methane in marine sediments                                                                 |
| 3463 | 52.4  | 2018 Global diffusive fluxes of methane in marine sediments                                                                 |
| 2587 | 53.2  | 2018 Global diffusive fluxes of methane in marine sediments                                                                 |
| 2656 | 57.3  | 2018 Global diffusive fluxes of methane in marine sediments                                                                 |
| 2803 | 57.8  | 2018 Global diffusive fluxes of methane in marine sediments                                                                 |
| 2854 | 63.1  | 2018 Global diffusive fluxes of methane in marine sediments                                                                 |
| 3300 | 76.6  | 2018 Global diffusive fluxes of methane in marine sediments                                                                 |
| 2614 | 77.3  | 2018 Global diffusive fluxes of methane in marine sediments                                                                 |
| 3300 | 81    | 2018 Global diffusive fluxes of methane in marine sediments                                                                 |
| 2516 | 82    | 2018 Global diffusive fluxes of methane in marine sediments                                                                 |
| 2575 | 84.5  | 2018 Global diffusive fluxes of methane in marine sediments                                                                 |
| 3038 | 86    | 2018 Global diffusive fluxes of methane in marine sediments                                                                 |
| 2271 | 88.6  | 2018 Global diffusive fluxes of methane in marine sediments                                                                 |
| 2088 | 90.3  | 2018 Global diffusive fluxes of methane in marine sediments                                                                 |
| 2028 | 98.2  | 2018 Global diffusive fluxes of methane in marine sediments                                                                 |
| 2211 | 110.2 | 2018 Global diffusive fluxes of methane in marine sediments                                                                 |
| 3280 | 130.2 | 2018 Global diffusive fluxes of methane in marine sediments                                                                 |
| 2951 | 149   | 2018 Global diffusive fluxes of methane in marine sediments                                                                 |
| 3200 | 150   | 2013 Quantitative analysis of anaerobic oxidation of methane (AOM) in marine sediments=A modeling perspective <sup>22</sup> |
| 2935 | 151.6 | 2018 Global diffusive fluxes of methane in marine sediments                                                                 |
| 2825 | 160   | 2013 Quantitative analysis of anaerobic oxidation of methane (AOM) in marine sediments=A modeling perspective               |
| 3451 | 185.1 | 2018 Global diffusive fluxes of methane in marine sediments                                                                 |
| 2663 | 216.1 | 2018 Global diffusive fluxes of methane in marine sediments                                                                 |
| 2091 | 238.4 | 2018 Global diffusive fluxes of methane in marine sediments                                                                 |
| 2901 | 238.4 | 2018 Global diffusive fluxes of methane in marine sediments                                                                 |
| 2463 | 240.3 | 2018 Global diffusive fluxes of methane in marine sediments                                                                 |
| 2304 | 257.2 | 2018 Global diffusive fluxes of methane in marine sediments                                                                 |
| 2422 | 296   | 2018 Global diffusive fluxes of methane in marine sediments                                                                 |
| 3069 | 301.5 | 2018 Global diffusive fluxes of methane in marine sediments                                                                 |
| 2862 | 314.2 | 2018 Global diffusive fluxes of methane in marine sediments                                                                 |
| 3192 | 340.1 | 2018 Global diffusive fluxes of methane in marine sediments                                                                 |
| 2549 | 346.9 | 2018 Global diffusive fluxes of methane in marine sediments                                                                 |
| 2354 | 460.1 | 2018 Global diffusive fluxes of methane in marine sediments                                                                 |
| 2705 | 477.8 | 2018 Global diffusive fluxes of methane in marine sediments                                                                 |
| 3319 | 805.9 | 2018 Global diffusive fluxes of methane in marine sediments                                                                 |

|      |       |                                                             |
|------|-------|-------------------------------------------------------------|
| 2622 | 834   | 2018 Global diffusive fluxes of methane in marine sediments |
| 3042 | 891.7 | 2018 Global diffusive fluxes of methane in marine sediments |

**Table S2.** The rates of aerobic methane oxidation in paddy fields.

| Paddy fields, Aerobic |                                                                      |                      |                                                                                                                                                             |
|-----------------------|----------------------------------------------------------------------|----------------------|-------------------------------------------------------------------------------------------------------------------------------------------------------------|
| CH <sub>4</sub> (atm) | Rates<br>( $\mu\text{mol/g/d}$ or<br>$\mu\text{mol/cm}^3/\text{d}$ ) | K (d <sup>-1</sup> ) | Reference                                                                                                                                                   |
| 1.85E-06              | 2.19E-03                                                             | 9.09E+02             | 2001 Methane Oxidation and Production Activity in Soils from Natural                                                                                        |
| 1.85E-06              | 1.79E-03                                                             | 7.44E+02             | 2001 Methane Oxidation and Production Activity in Soils from Natural                                                                                        |
| 1.00E-02              | 7.20E-02                                                             | 5.54E+00             | 2001 Methane Oxidation and Production Activity in Soils from Natural                                                                                        |
| 1.00E-02              | 1.77E+01                                                             | 1.36E+03             | 2001 Methane Oxidation and Production Activity in Soils from Natural                                                                                        |
| 2.00E-02              | 1.14E-01                                                             | 4.39E+00             | 1991 Methane oxidation in the soil surface layer of a flooded rice field and the effect of ammonium                                                         |
| 2.00E-02              | 1.92E-01                                                             | 7.39E+00             | 1991 Methane oxidation in the soil surface layer of a flooded rice field and the effect of ammonium                                                         |
| 2.00E-02              | 1.82E-01                                                             | 7.00E+00             | 1991 Methane oxidation in the soil surface layer of a flooded rice field and the effect of ammonium                                                         |
| 2.00E-02              | 2.64E-03                                                             | 1.02E-01             | 1991 Methane oxidation in the soil surface layer of a flooded rice field and the effect of ammonium                                                         |
| 2.00E-02              | 1.39E-01                                                             | 5.35E+00             | 1991 Methane oxidation in the soil surface layer of a flooded rice field and the effect of ammonium                                                         |
| 5.00E-04              | 1.68E-01                                                             | 2.58E+02             | 2000 Effect of NH <sub>4</sub> Cl addition on methane oxidation by paddy soils                                                                              |
| 1.00E-03              | 3.78E-01                                                             | 2.91E+02             | 2000 Effect of NH <sub>4</sub> Cl addition on methane oxidation by paddy soils                                                                              |
| 1.50E-03              | 7.58E-01                                                             | 3.89E+02             | 2000 Effect of NH <sub>4</sub> Cl addition on methane oxidation by paddy soils                                                                              |
| 2.00E-03              | 7.98E-01                                                             | 3.07E+02             | 2000 Effect of NH <sub>4</sub> Cl addition on methane oxidation by paddy soils                                                                              |
| 1.07E-02              | 8.40E+00                                                             | 6.03E+02             | 2003 Effect of a late season urea fertilization on methane emission from a rice field in Ital                                                               |
| 1.07E-02              | 7.20E+00                                                             | 5.17E+02             | 2003 Effects of N-fertilization on CH <sub>4</sub> oxidation and production, and consequences for CH <sub>4</sub> emissions from microcosms and rice fields |
| 1.07E-02              | 1.08E+01                                                             | 7.75E+02             | 2003 Effects of N-fertilization on CH <sub>4</sub> oxidation and production, and consequences for CH <sub>4</sub> emissions from microcosms and rice fields |
| 5.00E-02              | 2.00E-02                                                             | 3.08E-01             | 2012 Methane oxidation and methane driven redox process during sequential reduction of a flooded soil ecosystem                                             |
| 5.00E-02              | 4.25E-02                                                             | 6.54E-01             | 2012 Methane oxidation and methane driven redox process during sequential reduction of a flooded soil ecosystem                                             |
| 1.00E-02              | 2.88E+00                                                             | 2.22E+02             | 2020 Disentangling abiotic and biotic controls of aerobic methane oxidation during re-colonization                                                          |
| 1.00E-02              | 1.01E+01                                                             | 7.75E+02             | 2020 Disentangling abiotic and biotic controls of aerobic methane oxidation during re-colonization                                                          |
| 5.88E-03              | 1.60E+01                                                             | 2.09E+03             | 2002 Microbial aerobic oxidation of methane in paddy soil                                                                                                   |
| 5.88E-03              | 1.74E+01                                                             | 2.28E+03             | 2002 Microbial aerobic oxidation of methane in paddy soil                                                                                                   |
| 1.80E-06              | 7.20E-03                                                             | 3.08E+03             | 1994 Microbial oxidation of methane, ammonium and carbon monoxide, and turnover of nitrous oxide and nitric oxide in soils                                  |
| 3.50E-03              | 3.90E+00                                                             | 8.57E+02             | 1994 Microbial oxidation of methane, ammonium and carbon monoxide, and turnover of nitrous oxide and nitric oxide in soils                                  |
| 5.00E-02              | 1.40E+01                                                             | 2.15E+02             | 2018 Effect of salt stress on aerobic methane oxidation and associated methanotrophs; a microcosm study of a natural community from a nonsaline environment |

**Table S3.** The rates of anaerobic methane oxidation in paddy fields.

| Paddy fields, Anaerobic |                                                                      |                      |                                                                                                                                     |
|-------------------------|----------------------------------------------------------------------|----------------------|-------------------------------------------------------------------------------------------------------------------------------------|
| CH <sub>4</sub> (atm)   | Rates<br>( $\mu\text{mol/g/d}$ or<br>$\mu\text{mol/cm}^3/\text{d}$ ) | K (d <sup>-1</sup> ) | Reference                                                                                                                           |
| 1.01E-01                | 2.00E-04                                                             | 1.53E-03             | 2014 Evidence for the cooccurrence of nitrite-dependent anaerobic ammonium and methane oxidation processes in a flooded paddy field |
| 1.01E-01                | 2.10E-03                                                             | 1.60E-02             | 2014 Evidence for the cooccurrence of nitrite-dependent anaerobic ammonium and                                                      |

|          |          |          |                                                                                                                                              |
|----------|----------|----------|----------------------------------------------------------------------------------------------------------------------------------------------|
|          |          |          | methane oxidation processes in a flooded paddy field                                                                                         |
| 1.00E-01 | 7.99E-02 | 6.15E-01 | 2016 Distribution and activity of the anaerobic methanotrophic community in a nitrogen-fertilized Italian paddy soil                         |
| 3.10E-02 | 1.60E-03 | 3.97E-02 | 2020 Anaerobic oxidation of methane in paddy soil: Role of electron acceptors and fertilization in mitigating CH <sub>4</sub> fluxes         |
| 6.86E-02 | 4.20E-04 | 4.71E-03 | 2019 To shake or not to shake: <sup>13</sup> C-based evidence on anaerobic methane oxidation in paddy soil                                   |
| 6.86E-02 | 8.80E-04 | 9.87E-03 | 2019 To shake or not to shake: <sup>13</sup> C-based evidence on anaerobic methane oxidation in paddy soil                                   |
| 2.50E-02 | 3.46E-02 | 1.06E+00 | 2021 Effects of antimony on anaerobic methane oxidization and microbial community in an antimony-contaminated paddy soil: A microcosm study  |
| 2.00E-01 | 2.26E-03 | 8.69E-03 | 2021 Long-term effects of four environment-related iron minerals on microbial anaerobic oxidation of methane in paddy soil                   |
| 2.00E-01 | 7.53E-04 | 2.90E-03 | 2021 Long-term effects of four environment-related iron minerals on microbial anaerobic oxidation of methane in paddy soil                   |
| 5.00E-02 | 4.38E-03 | 6.73E-02 | 2012 Methane oxidation and methane driven redox process during sequential reduction of a flooded soil ecosystem                              |
| 5.00E-02 | 2.88E-02 | 4.42E-01 | 2012 Methane oxidation and methane driven redox process during sequential reduction of a flooded soil ecosystem                              |
| 5.00E-02 | 2.32E-04 | 3.57E-03 | 2021 Electron shuttles facilitate anaerobic methane oxidation coupled to nitrous oxide reduction in paddy soil                               |
| 5.00E-02 | 2.27E-04 | 3.49E-03 | 2021 Electron shuttles facilitate anaerobic methane oxidation coupled to nitrous oxide reduction in paddy soil                               |
| 3.49E-02 | 1.53E-02 | 3.38E-01 | 2017 Using <sup>13</sup> C isotopes to explore denitrification-dependent anaerobic methane oxidation in a paddy-peatland                     |
| 3.49E-02 | 7.37E-03 | 1.62E-01 | 2017 Using <sup>13</sup> C isotopes to explore denitrification-dependent anaerobic methane oxidation in a paddy-peatland                     |
| 3.10E-02 | 6.80E-04 | 1.69E-02 | 2021 Temperature sensitivity of anaerobic methane oxidation versus methanogenesis in paddy soil Implications for the CH <sub>4</sub> balance |

**Table S4.** The rates of aerobic methane oxidation in freshwater wetlands.

| Freshwater wetlands, Aerobic |                                                                      |                      |                                                                                                          |
|------------------------------|----------------------------------------------------------------------|----------------------|----------------------------------------------------------------------------------------------------------|
| CH <sub>4</sub> (atm)        | Rates<br>( $\mu\text{mol/g/d}$ or<br>$\mu\text{mol/cm}^3/\text{d}$ ) | K (d <sup>-1</sup> ) | Reference                                                                                                |
| 1.20E-03                     | 3.00E-05                                                             | 1.92E-02             | 1996 Moisture and temperature sensitivity of CH <sub>4</sub> oxidation in boreal soils                   |
| 1.80E-06                     | 6.24E-04                                                             | 2.67E+02             | 1993 Kinetics of methane oxidation in oxic soils                                                         |
| 1.20E-03                     | 7.50E-04                                                             | 4.81E-01             | 1996 Moisture and temperature sensitivity of CH <sub>4</sub> oxidation in boreal soils                   |
| 2.00E-06                     | 8.40E-04                                                             | 3.23E+02             | 2004 Methane oxidation in boreal forest soils: kinetics and sensitivity to pH and ammonium               |
| 1.20E-03                     | 1.80E-03                                                             | 1.15E+00             | 1996 Moisture and temperature sensitivity of CH <sub>4</sub> oxidation in boreal soils                   |
| 1.80E-06                     | 2.40E-03                                                             | 1.03E+03             | 2004 Methane oxidation in boreal forest soils: kinetics and sensitivity to pH and ammonium               |
| 5.60E-05                     | 5.40E-03                                                             | 7.42E+01             | 2004 Methane oxidation in boreal forest soils: kinetics and sensitivity to pH and ammonium               |
| 2.50E-04                     | 7.20E-03                                                             | 2.22E+01             | 2004 Methane oxidation in boreal forest soils: kinetics and sensitivity to pH and ammonium               |
| 8.00E-05                     | 7.44E-03                                                             | 7.15E+01             | 2004 Methane oxidation in boreal forest soils: kinetics and sensitivity to pH and ammonium               |
| -                            | 8.64E-03                                                             |                      | 1998 Methane production and methane consumption: a review of processes underlying wetland methane fluxes |
| 1.00E-02                     | 1.00E-02                                                             | 7.69E-01             | 1994 Methane Metabolism in a Temperate Swamp                                                             |
| 1.00E-03                     | 1.18E-02                                                             | 9.05E+00             | 2004 Methane oxidation in boreal forest soils: kinetics and sensitivity to pH and ammonium               |
| 5.00E-05                     | 1.44E-02                                                             | 2.22E+02             | 2004 Methane oxidation in boreal forest soils: kinetics and sensitivity to pH and ammonium               |
| 5.00E-03                     | 1.56E-02                                                             | 2.40E+00             | 2004 Methane oxidation in boreal forest soils: kinetics and sensitivity to pH and ammonium               |
| 1.80E-06                     | 1.78E-02                                                             | 7.59E+03             | 1993 Kinetics of methane oxidation in oxic soils                                                         |
| 1.00E-04                     | 2.40E-02                                                             | 1.85E+02             | 2004 Methane oxidation in boreal forest soils: kinetics and sensitivity to pH and ammonium               |

|          |          |          |                                                                                                                                                         |
|----------|----------|----------|---------------------------------------------------------------------------------------------------------------------------------------------------------|
| 9.00E-04 | 3.13E-02 | 2.67E+01 | 1997 Methane and carbon dioxide exchange potentials of peat soils in aerobic and anaerobic laboratory incubation                                        |
| 1.80E-06 | 3.43E-02 | 1.47E+04 | 1993 Kinetics of methane oxidation in oxic soils                                                                                                        |
| 3.50E-03 | 4.80E-02 | 1.05E+01 | 2014 Seasonal methanotrophy across a hydrological gradient in a freshwater wetland                                                                      |
| 3.50E-03 | 4.80E-02 | 1.05E+01 | 2014 Seasonal methanotrophy across a hydrological gradient in a freshwater wetland                                                                      |
| 2.50E-04 | 5.04E-02 | 1.55E+02 | 2004 Methane oxidation in boreal forest soils: kinetics and sensitivity to pH and ammonium                                                              |
| 6.00E-01 | 6.00E-02 | 7.69E-02 | 2020 Active Methanotrophs in Suboxic Alpine Swamp Soils of the Qinghai-Tibetan Plateau                                                                  |
| 3.50E-03 | 6.00E-02 | 1.32E+01 | 2014 Seasonal methanotrophy across a hydrological gradient in a freshwater wetland                                                                      |
| 1.00E-03 | 8.40E-02 | 6.46E+01 | 2004 Methane oxidation in boreal forest soils: kinetics and sensitivity to pH and ammonium                                                              |
| 3.50E-03 | 8.40E-02 | 1.85E+01 | 2014 Seasonal methanotrophy across a hydrological gradient in a freshwater wetland                                                                      |
| 1.80E-06 | 8.64E-02 | 3.69E+04 | 1993 Kinetics of methane oxidation in oxic soils                                                                                                        |
| 3.50E-03 | 9.60E-02 | 2.11E+01 | 2014 Seasonal methanotrophy across a hydrological gradient in a freshwater wetland                                                                      |
| 3.50E-03 | 9.60E-02 | 2.11E+01 | 2014 Seasonal methanotrophy across a hydrological gradient in a freshwater wetland                                                                      |
| 1.00E-04 | 1.01E-01 | 7.75E+02 | 1993 Methane production and consumption in temperate and subarctic peat soils: response to temperature and pH.                                          |
| 1.00E-02 | 1.10E-01 | 8.46E+00 | 1994 Methane Metabolism in a Temperate Swamp                                                                                                            |
| 2.00E-04 | 1.20E-01 | 4.62E+02 | 1993 Methane production and consumption in temperate and subarctic peat soils: response to temperature and pH.                                          |
| 6.00E-01 | 1.20E-01 | 1.54E-01 | 2020 Active Methanotrophs in Suboxic Alpine Swamp Soils of the Qinghai-Tibetan Plateau                                                                  |
| 3.50E-03 | 1.20E-01 | 2.64E+01 | 2014 Seasonal methanotrophy across a hydrological gradient in a freshwater wetland                                                                      |
| 1.20E-03 | 1.50E-01 | 9.62E+01 | 1996 Moisture and temperature sensitivity of CH <sub>4</sub> oxidation in boreal soils                                                                  |
| 6.00E-01 | 1.50E-01 | 1.92E-01 | 2020 Active Methanotrophs in Suboxic Alpine Swamp Soils of the Qinghai-Tibetan Plateau                                                                  |
| 5.00E-03 | 1.56E-01 | 2.40E+01 | 2004 Methane oxidation in boreal forest soils: kinetics and sensitivity to pH and ammonium                                                              |
| 3.50E-03 | 1.68E-01 | 3.69E+01 | 2014 Seasonal methanotrophy across a hydrological gradient in a freshwater wetland                                                                      |
| 3.00E-04 | 1.92E-01 | 4.92E+02 | 1993 Methane production and consumption in temperate and subarctic peat soils: response to temperature and pH.                                          |
| 3.50E-03 | 1.92E-01 | 4.22E+01 | 2014 Seasonal methanotrophy across a hydrological gradient in a freshwater wetland                                                                      |
| 1.20E-03 | 2.06E-01 | 1.32E+02 | 1996 Moisture and temperature sensitivity of CH <sub>4</sub> oxidation in boreal soils                                                                  |
| -        | 2.50E-01 | 1.25E-01 | 2020 Methylobacter accounts for strong aerobic methane oxidation in the Yellow River Delta with characteristics of a methane sink during the dry season |
| 3.50E-03 | 2.88E-01 | 6.33E+01 | 2014 Seasonal methanotrophy across a hydrological gradient in a freshwater wetland                                                                      |
| 1.00E-02 | 3.10E-01 | 2.38E+01 | 1994 Methane Metabolism in a Temperate Swamp                                                                                                            |
| 3.50E-03 | 3.12E-01 | 6.86E+01 | 2014 Seasonal methanotrophy across a hydrological gradient in a freshwater wetland                                                                      |
| 3.50E-03 | 3.12E-01 | 6.86E+01 | 2014 Seasonal methanotrophy across a hydrological gradient in a freshwater wetland                                                                      |
| 1.00E-02 | 4.30E-01 | 3.31E+01 | 1994 Methane Metabolism in a Temperate Swamp                                                                                                            |
| 3.50E-03 | 4.32E-01 | 9.49E+01 | 2014 Seasonal methanotrophy across a hydrological gradient in a freshwater wetland                                                                      |
| 1.20E-03 | 4.50E-01 | 2.88E+02 | 1996 Moisture and temperature sensitivity of CH <sub>4</sub> oxidation in boreal soils                                                                  |
| 1.00E-02 | 5.28E-01 | 4.06E+01 | 1995 CH <sub>4</sub> production, oxidation and emission in a U.K. ombrotrophic peat bog: Influence of SO <sub>4</sub> <sup>2-</sup> from acid rain      |
| 3.36E-05 | 5.40E-01 | 1.24E+04 | 2014 Methanogenesis and methanotrophy within a Sphagnum peatland                                                                                        |
| -        | 5.40E-01 | 5.40E+02 | 2014 Methanogenesis and methanotrophy within a Sphagnum peatland                                                                                        |
| 9.00E-04 | 6.25E-01 | 5.34E+02 | 1997 Methane and carbon dioxide exchange potentials of peat soils in aerobic and anaerobic laboratory incubation                                        |

|          |          |          |                                                                                                                                                    |
|----------|----------|----------|----------------------------------------------------------------------------------------------------------------------------------------------------|
| 1.00E-03 | 7.20E-01 | 5.54E+02 | 1993 Methane production and consumption in temperate and subarctic peat soils: response to temperature and pH.                                     |
| 2.00E-03 | 7.68E-01 | 2.95E+02 | 1993 Methane production and consumption in temperate and subarctic peat soils: response to temperature and pH.                                     |
| -        | 7.68E-01 | 5.12E+02 | 2014 Methanogenesis and methanotrophy within a Sphagnum peatland                                                                                   |
| 1.00E-02 | 8.40E-01 | 6.46E+01 | 1994 Methane Metabolism in a Temperate Swamp                                                                                                       |
| 1.00E-02 | 8.40E-01 | 6.46E+01 | 1995 CH <sub>4</sub> production, oxidation and emission in a U.K. ombrotrophic peat bog: Influence of SO <sub>4</sub> <sup>2-</sup> from acid rain |
| 1.00E-02 | 8.50E-01 | 6.54E+01 | 1994 Methane Metabolism in a Temperate Swamp                                                                                                       |
| 1.00E-02 | 9.30E-01 | 7.15E+01 | 1994 Methane Metabolism in a Temperate Swamp                                                                                                       |
| 1.00E-02 | 9.60E-01 | 7.38E+01 | 1995 CH <sub>4</sub> production, oxidation and emission in a U.K. ombrotrophic peat bog: Influence of SO <sub>4</sub> <sup>2-</sup> from acid rain |
| 6.50E-03 | 1.03E+00 | 1.22E+02 | 1993 Methane production and consumption in temperate and subarctic peat soils: response to temperature and pH.                                     |
| 9.00E-03 | 1.08E+00 | 9.23E+01 | 1993 Methane production and consumption in temperate and subarctic peat soils: response to temperature and pH.                                     |
| 1.00E-02 | 1.08E+00 | 8.31E+01 | 1995 CH <sub>4</sub> production, oxidation and emission in a U.K. ombrotrophic peat bog: Influence of SO <sub>4</sub> <sup>2-</sup> from acid rain |
| 1.00E-02 | 1.20E+00 | 9.23E+01 | 1995 CH <sub>4</sub> production, oxidation and emission in a U.K. ombrotrophic peat bog: Influence of SO <sub>4</sub> <sup>2-</sup> from acid rain |
| 1.00E-02 | 1.20E+00 | 9.23E+01 | 1995 CH <sub>4</sub> production, oxidation and emission in a U.K. ombrotrophic peat bog: Influence of SO <sub>4</sub> <sup>2-</sup> from acid rain |
| 9.00E-04 | 1.25E+00 | 1.07E+03 | 1997 Methane and carbon dioxide exchange potentials of peat soils in aerobic and anaerobic laboratory incubation                                   |
| -        | 1.38E+00 | 9.20E+01 | 2014 Methanogenesis and methanotrophy within a Sphagnum peatland                                                                                   |
| -        | 1.39E+00 | 1.86E+02 | 2014 Methanogenesis and methanotrophy within a Sphagnum peatland                                                                                   |
| 1.00E-02 | 1.44E+00 | 1.11E+02 | 1995 CH <sub>4</sub> production, oxidation and emission in a U.K. ombrotrophic peat bog: Influence of SO <sub>4</sub> <sup>2-</sup> from acid rain |
| 1.00E-02 | 1.56E+00 | 1.20E+02 | 1995 CH <sub>4</sub> production, oxidation and emission in a U.K. ombrotrophic peat bog: Influence of SO <sub>4</sub> <sup>2-</sup> from acid rain |
| 1.00E-02 | 1.58E+00 | 1.22E+02 | 1995 CH <sub>4</sub> production, oxidation and emission in a U.K. ombrotrophic peat bog: Influence of SO <sub>4</sub> <sup>2-</sup> from acid rain |
| 1.00E-02 | 1.59E+00 | 1.22E+02 | 1994 Methane Metabolism in a Temperate Swamp                                                                                                       |
| 3.36E-04 | 1.61E+00 | 3.68E+03 | 2014 Methanogenesis and methanotrophy within a Sphagnum peatland                                                                                   |
| 3.00E-03 | 1.95E+00 | 5.00E+02 | 1994 Depth Distribution of Microbial Production and Oxidation of Methane in Northern Boreal Peatlands                                              |
| 1.00E-02 | 2.40E+00 | 1.85E+02 | 1995 CH <sub>4</sub> production, oxidation and emission in a U.K. ombrotrophic peat bog: Influence of SO <sub>4</sub> <sup>2-</sup> from acid rain |
| 1.00E-02 | 2.43E+00 | 1.87E+02 | 1994 Methane Metabolism in a Temperate Swamp                                                                                                       |
| 1.00E-02 | 3.00E+00 | 2.31E+02 | 2014 CH <sub>4</sub> production, oxidation and emission in a U.K. ombrotrophic peat bog: Influence of SO <sub>4</sub> <sup>2-</sup> from acid rain |
| 9.00E-04 | 3.13E+00 | 2.67E+03 | 1997 Methane and carbon dioxide exchange potentials of peat soils in aerobic and anaerobic laboratory incubation                                   |
| 1.00E-02 | 3.60E+00 | 2.77E+02 | 2014 CH <sub>4</sub> production, oxidation and emission in a U.K. ombrotrophic peat bog: Influence of SO <sub>4</sub> <sup>2-</sup> from acid rain |

**Table S5.** The rates of anaerobic methane oxidation in freshwater wetlands.

| Freshwater wetland, Anaerobic |                                                                      |                       |                                                                                                                                                               |
|-------------------------------|----------------------------------------------------------------------|-----------------------|---------------------------------------------------------------------------------------------------------------------------------------------------------------|
| CH <sub>4</sub> (atm)         | Rates<br>( $\mu\text{mol/g/d}$ or<br>$\mu\text{mol/cm}^3/\text{d}$ ) | K ( $\text{d}^{-1}$ ) | Reference                                                                                                                                                     |
| 1.00E-01                      | 2.70E-03                                                             | 2.08E-02              | 2020 Niche differentiation of denitrifying anaerobic methane oxidizing bacteria and archaea leads to effective methane filtration in a Tibetan alpine wetland |
| 1.00E-01                      | 1.22E-02                                                             | 9.41E-02              | 2020 Niche differentiation of denitrifying anaerobic methane oxidizing bacteria and archaea leads to effective methane filtration in a Tibetan alpine wetland |
| 1.00E-01                      | 2.00E-03                                                             | 1.54E-02              | 2020 Niche differentiation of denitrifying anaerobic methane oxidizing bacteria and archaea leads to effective methane filtration in a Tibetan alpine wetland |
| 1.00E-01                      | 4.00E-03                                                             | 3.08E-02              | 2020 Niche differentiation of denitrifying anaerobic methane oxidizing bacteria and archaea leads to effective methane filtration in a Tibetan alpine wetland |
| 1.00E-01                      | 3.77E-02                                                             | 2.90E-01              | 2020 Niche differentiation of denitrifying anaerobic methane oxidizing bacteria and archaea leads to effective methane filtration in a Tibetan alpine wetland |

|          |          |          |                                                                                                                                                                             |
|----------|----------|----------|-----------------------------------------------------------------------------------------------------------------------------------------------------------------------------|
| 2.00E-05 | 1.10E-03 | 4.23E+01 | 2015 More evidence that anaerobic oxidation of methane is prevalent in soils: Is it time to upgrade our biogeochemical models                                               |
| 1.00E+00 | 5.00E-02 | 3.85E-02 | 2015 High rates of anaerobic methane oxidation in freshwater wetlands reduce potential atmospheric methane emissions                                                        |
| 1.00E+00 | 1.50E-02 | 1.15E-02 | 2015 High rates of anaerobic methane oxidation in freshwater wetlands reduce potential atmospheric methane emissions                                                        |
| 2.50E-02 | 1.66E-02 | 5.11E-01 | 2013 Stable Isotopes Reveal Widespread Anaerobic Methane Oxidation Across Latitude and Peatland Type                                                                        |
| 1.00E-01 | 3.80E-04 | 2.92E-03 | 2020 Exogenous nitrogen addition inhibits sulfate-mediated anaerobic oxidation of methane in estuarine coastal sediments                                                    |
| 1.00E-01 | 2.40E-03 | 1.85E-02 | 2020 Exogenous nitrogen addition inhibits sulfate-mediated anaerobic oxidation of methane in estuarine coastal sediments                                                    |
| 1.00E-01 | 2.56E-03 | 1.97E-02 | 2020 Exogenous nitrogen addition inhibits sulfate-mediated anaerobic oxidation of methane in estuarine coastal sediments                                                    |
| 1.00E-01 | 8.00E-04 | 6.15E-03 | 2020 Exogenous nitrogen addition inhibits sulfate-mediated anaerobic oxidation of methane in estuarine coastal sediments                                                    |
| -        | 3.10E-04 | -        | 2014 Evidence for nitrite-dependent anaerobic methane oxidation as a previously overlooked microbial methane sink                                                           |
| 9.10E-02 | 5.43E-03 | 4.59E-02 | 2014 Evidence for nitrite-dependent anaerobic methane oxidation as a previously overlooked microbial methane sink                                                           |
| 9.10E-02 | 8.00E-04 | 6.76E-03 | 2014 Evidence for nitrite-dependent anaerobic methane oxidation as a previously overlooked microbial methane sink                                                           |
| 9.10E-02 | 4.80E-03 | 4.06E-02 | 2014 Evidence for nitrite-dependent anaerobic methane oxidation as a previously overlooked microbial methane sink                                                           |
| 9.10E-02 | 1.50E-03 | 1.27E-02 | 2014 Evidence for nitrite-dependent anaerobic methane oxidation as a previously overlooked microbial methane sink                                                           |
| 9.10E-02 | 4.60E-03 | 3.89E-02 | 2014 Evidence for nitrite-dependent anaerobic methane oxidation as a previously overlooked microbial methane sink                                                           |
| 9.10E-02 | 3.50E-03 | 2.96E-02 | 2014 Evidence for nitrite-dependent anaerobic methane oxidation as a previously overlooked microbial methane sink                                                           |
| 9.10E-02 | 2.00E-03 | 1.69E-02 | 2014 Evidence for nitrite-dependent anaerobic methane oxidation as a previously overlooked microbial methane sink                                                           |
| 1.00E+00 | 4.90E-03 | 3.77E-03 | 2013 Impact of electron acceptor availability on the anaerobic oxidation of methane in coastal freshwater and brackish wetland sediments                                    |
| 1.00E+00 | 2.66E-02 | 2.05E-02 | 2013 Impact of electron acceptor availability on the anaerobic oxidation of methane in coastal freshwater and brackish wetland sediments                                    |
| 1.00E-01 | 3.41E-03 | 2.62E-02 | 2013 Impact of electron acceptor availability on the anaerobic oxidation of methane in coastal freshwater and brackish wetland sediments                                    |
| 1.00E-01 | 8.48E-03 | 6.52E-02 | 2020 Depth-specific distribution and significance of nitrite-dependent anaerobic methane oxidation process in tidal flow constructed wetlands used for treating river water |
| 1.00E-01 | 2.50E-03 | 1.92E-02 | 2020 Depth-specific distribution and significance of nitrite-dependent anaerobic methane oxidation process in tidal flow constructed wetlands used for treating river water |
| 1.00E-01 | 1.50E-03 | 1.15E-02 | 2020 Depth-specific distribution and significance of nitrite-dependent anaerobic methane oxidation process in tidal flow constructed wetlands used for treating river water |

**Table S6.** The rates of anaerobic methane oxidation in marine environment.

| Marine, Anaerobic    |                       |                                             |                      |                                                                                                                       |
|----------------------|-----------------------|---------------------------------------------|----------------------|-----------------------------------------------------------------------------------------------------------------------|
| Category             | CH <sub>4</sub> (atm) | Rates (μmol/g/d or μmol/cm <sup>3</sup> /d) | K (d <sup>-1</sup> ) | Reference                                                                                                             |
| inner shelf (10-50m) | 1.00E-01              | 3.00E-03                                    | -                    | 2019 Denitrifying Anaerobic Methane Oxidation: A Previously Overlooked Methane Sink in Intertidal Zone                |
| inner shelf (10-50m) | 1.00E-01              | 2.00E-04                                    | -                    | 2016 Anaerobic methane oxidation coupled to nitrite reduction can be a potential methane sink in coastal environments |
| inner shelf (10-50m) | 1.00E-01              | 1.30E-03                                    | -                    | 2016 Anaerobic methane oxidation coupled to nitrite reduction can be a potential methane sink in coastal environments |
| inner shelf (10-50m) | 1.00E-02              | 3.99E-02                                    | -                    | 2020 Denitrifying anaerobic methane oxidation                                                                         |

|                            |          |          |          |                                                                                                                                                                        |
|----------------------------|----------|----------|----------|------------------------------------------------------------------------------------------------------------------------------------------------------------------------|
|                            |          |          |          | in intertidal marsh soils: Occurrence and environmental significance                                                                                                   |
| inner shelf (10-50m)       | 1.00E+00 | 1.50E-03 | -        | 2020 Denitrifying anaerobic methane oxidation in intertidal marsh soils: Occurrence and environmental significance                                                     |
| inner shelf (10-50m) 45 m  | 1.00E-01 | 6.48E+00 | -        | 2016 Anaerobic Oxidation of Methane Coupled to Nitrite Reduction by Halophilic Marine NC10 Bacteria                                                                    |
| inner shelf (10-50m)28 m   | 1.00E-02 | 1.00E-01 | -        | 2020 Denitrifying anaerobic methane oxidation in marsh sediments of Chongming eastern intertidal flat                                                                  |
| inner shelf (10-50m)28 m   | 1.00E-02 | 4.67E-02 | -        | 2020 Denitrifying anaerobic methane oxidation in marsh sediments of Chongming eastern intertidal flat                                                                  |
| inner shelf (10-50m)28 m   | 1.00E-02 | 8.43E-02 | -        | 2021 Microbial abundance and activity of nitrite/nitrate-dependent anaerobic methane oxidizers in estuarine and intertidal wetlands: Heterogeneity and driving factors |
| inner shelf (10-50m)28 m   | 1.00E-02 | 3.26E-02 | -        | 2021 Microbial abundance and activity of nitrite/nitrate-dependent anaerobic methane oxidizers in estuarine and intertidal wetlands: Heterogeneity and driving factors |
| Slope (200–2,000),520m     | 2.50E+00 | 3.80E-02 | -        | 2009 Manganese- and Iron-Dependent Marine Methane Oxidation                                                                                                            |
| Slope (200–2,000),520m     | 2.00E-01 | 3.21E-02 | -        | 2020 Influence of electron acceptor availability and microbial community structure on sedimentary methane oxidation in a boreal estuary                                |
| Slope (200–2,000),-850 m   | 3.50E-01 | 7.00E-01 | -        | 2016 Artificial electron acceptors decouple archaeal methane oxidation from sulfate reduction                                                                          |
| Slope (200–2,000),-850 m   | 3.50E-01 | 8.10E-01 | -        | 2016 Artificial electron acceptors decouple archaeal methane oxidation from sulfate reduction                                                                          |
| Rise (2,000–3,500),2428 m  | 2.15E+00 | 1.52E-01 | -        | 2012 Anaerobic methane oxidation in metalliferous hydrothermal sediments: influence on carbon flux and decoupling from sulfate reduction                               |
| Outer shelf (50–200)       | 1.00E+00 | 9.50E-05 | 6.33E-05 | 2020 Rates and Microbial Players of Iron-Driven Anaerobic Oxidation of Methane in Methanic Marine Sediments                                                            |
| Slope (200–2,000),210m     | 4.50E-01 | 3.60E-03 | -        | 2015 Iron-Mediated Anaerobic Oxidation of Methane in Brackish Coastal Sediments                                                                                        |
| Outer shelf (50–200),100 m | 1.00E+00 | 3.63E-02 | -        | 2018Anaerobic methane oxidation inducing carbonate precipitation at abiogenic methane seeps in the Tuscan archipelago                                                  |
| Outer shelf (50–200), 71 m | 1.54E+00 | 7.00E+01 | -        | 2018 Methane as an Organic Matter Source and the Trophic Basis of a Laptev Sea Cold Seep Microbial Communit                                                            |
| inner shelf (10-50m),28 m  | 7.69E-01 | 2.20E-01 | -        | 2005 Microbial methane turnover in different marine habitats                                                                                                           |
| inner shelf (10-50m)       | 7.69E-01 | 1.20E-01 | -        | 2005 Microbial methane turnover in different marine habitats                                                                                                           |
| Inner shelf (0–10),0.5 m   | -        | 1.20E-03 | -        | 1994 Field and laboratory studies of methane oxidation in an anoxic                                                                                                    |
| Inner shelf (0–10)         | 1.00E-01 | 7.40E-04 | -        | 2019 Denitrifying Anaerobic Methane Oxidation: A Previously Overlooked Methane Sink in Intertidal Zone                                                                 |
| Inner shelf (0–10), 4 m    | 6.92E-01 | 4.34E-02 | -        | 2018 Decoupling between sulfate reduction and the anaerobic oxidation of methane in the shallow methane seep of the Black sea                                          |
| Inner shelf (0–10), 4 m    | 5.00E-01 | 2.00E-03 | 3.08E-03 | 2018 Decoupling between sulfate reduction and the anaerobic oxidation of methane in the shallow methane seep of the Black sea                                          |
| Inner shelf (0–10), 4 m    | 1.54E-03 | 1.00E-05 | 5.00E-03 | 2018 Decoupling between sulfate reduction and                                                                                                                          |

|                               |          |          |          |                                                                                                                                                 |
|-------------------------------|----------|----------|----------|-------------------------------------------------------------------------------------------------------------------------------------------------|
|                               |          |          |          | the anaerobic oxidation of methane in the shallow methane seep of the Black sea                                                                 |
| Inner shelf (0–10), 4 m       | 4.23E-03 | 7.00E-05 | 1.27E-02 | 2018 Decoupling between sulfate reduction and the anaerobic oxidation of methane in the shallow methane seep of the Black sea                   |
| Inner shelf (0–10)            | 1.00E+00 | 1.50E-03 | -        | 2020 Denitrifying anaerobic methane oxidation in intertidal marsh soils: Occurrence and environmental significance                              |
| inner shelf (10-50m)          | 2.00E-05 | 2.60E-03 | -        | 2019 More evidence that anaerobic oxidation of methane is prevalent in soils: Is it time to upgrade our biogeochemical models                   |
| inner shelf (10-50m)          | 1.00E+00 | 1.28E-02 | -        | 2015 Growth of Anaerobic Methane-Oxidizing Archaea and Sulfate-Reducing Bacteria in a High-Pressure Membrane                                    |
| inner shelf (10-50m)          | 1.00E+00 | 1.89E-02 | -        | 2015 Growth of Anaerobic Methane-Oxidizing Archaea and Sulfate-Reducing Bacteria in a High-Pressure Membrane                                    |
| inner shelf (10-50m), 30-40 m | 7.67E-02 | 1.26E-02 | 1.26E-01 | 2011 Weak coupling between sulfate reduction and the anaerobic oxidation of methane in methane-rich seafloor sediments during ex situ incubatio |
| inner shelf (10-50m), 30-40 m | 9.23E-01 | 1.00E-04 | 8.33E-05 | 2012 Sulfate Reduction, Methanogenesis, and Methane Oxidation in the Holocene Sediments of the Vyborg Bay, Baltic Sea                           |
| inner shelf (10-50m), 30-40 m | 9.23E-01 | 2.00E-04 | 1.67E-04 | 2012 Sulfate Reduction, Methanogenesis, and Methane Oxidation in the Holocene Sediments of the Vyborg Bay, Baltic Sea                           |
| inner shelf (10-50m), 30-40 m | 9.23E-01 | 4.00E-04 | 3.33E-04 | 2012 Sulfate Reduction, Methanogenesis, and Methane Oxidation in the Holocene Sediments of the Vyborg Bay, Baltic Sea                           |
| inner shelf (10-50m), 30-40 m | 9.23E-01 | 2.30E-03 | 1.92E-03 | 2012 Sulfate Reduction, Methanogenesis, and Methane Oxidation in the Holocene Sediments of the Vyborg Bay, Baltic Sea                           |
| inner shelf (10-50m), 30-40 m | 9.23E-01 | 1.00E-04 | 8.33E-05 | 2012 Sulfate Reduction, Methanogenesis, and Methane Oxidation in the Holocene Sediments of the Vyborg Bay, Baltic Sea                           |
| inner shelf (10-50m), 30-40 m | 9.23E-01 | 5.00E-04 | 4.17E-04 | 2012 Sulfate Reduction, Methanogenesis, and Methane Oxidation in the Holocene Sediments of the Vyborg Bay, Baltic Sea                           |
| inner shelf (10-50m), 30-40 m | 9.23E-01 | 1.00E-03 | 8.33E-04 | 2012 Sulfate Reduction, Methanogenesis, and Methane Oxidation in the Holocene Sediments of the Vyborg Bay, Baltic Sea                           |
| inner shelf (10-50m), 30-40 m | -        | 1.40E-03 | -        | 2012 Sulfate Reduction, Methanogenesis, and Methane Oxidation in the Holocene Sediments of the Vyborg Bay, Baltic Sea                           |
| inner shelf (10-50m), 30-40 m | -        | 9.00E-05 | -        | 2012 Sulfate Reduction, Methanogenesis, and Methane Oxidation in the Holocene Sediments of the Vyborg Bay, Baltic Sea                           |
| inner shelf (10-50m), 30-40 m | -        | 5.00E-05 | -        | 2012 Sulfate Reduction, Methanogenesis, and Methane Oxidation in the Holocene Sediments of the Vyborg Bay, Baltic Sea                           |
| inner shelf (10-50m), 30-40 m | -        | 7.00E-06 | -        | 2012 Sulfate Reduction, Methanogenesis, and Methane Oxidation in the Holocene Sediments of the Vyborg Bay, Baltic Sea                           |
| Slope (200–2,000), 880 m      | 9.23E-01 | 1.40E-03 | 1.17E-03 | 2012 Sulfate Reduction, Methanogenesis, and Methane Oxidation in the Holocene Sediments of the Vyborg Bay, Baltic Sea                           |
| Slope (200–2,000), 880 m      | 4.39E-01 | 6.50E-03 | 1.14E-02 | 2011 Weak coupling between sulfate reduction and the anaerobic oxidation of methane in methane-rich seafloor sediments during ex situ incubatio |
| Slope (200–2,000), 880 m      | 4.99E-01 | 8.00E-04 | 1.23E-03 | 2011 Weak coupling between sulfate reduction and the anaerobic oxidation of methane in methane-rich seafloor sediments during ex situ incubatio |

|                          |          |          |          |                                                                                                                                                  |
|--------------------------|----------|----------|----------|--------------------------------------------------------------------------------------------------------------------------------------------------|
| Slope (200–2,000), 880 m | 4.12E-01 | 1.00E-03 | 1.87E-03 | 2011 Weak coupling between sulfate reduction and the anaerobic oxidation of methane in methane-rich seafloor sediments during ex situ incubatio  |
| Slope (200–2,000), 880 m | 6.00E-01 | 1.30E-03 | 1.67E-03 | 2011 Weak coupling between sulfate reduction and the anaerobic oxidation of methane in methane-rich seafloor sediments during ex situ incubatio  |
| Slope (200–2,000), 880 m | 2.37E-01 | 1.07E-02 | 3.47E-02 | 2011 Weak coupling between sulfate reduction and the anaerobic oxidation of methane in methane-rich seafloor sediments during ex situ incubatio  |
| Slope (200–2,000), 880 m | 3.84E-01 | 6.70E-03 | 1.34E-02 | 2011 Weak coupling between sulfate reduction and the anaerobic oxidation of methane in methane-rich seafloor sediments during ex situ incubation |
| Slope (200–2,000), 880 m | 4.75E-01 | 2.70E-03 | 4.37E-03 | 2011 Weak coupling between sulfate reduction and the anaerobic oxidation of methane in methane-rich seafloor sediments during ex situ incubation |
| Slope (200–2,000), 880 m | 4.95E-01 | 2.90E-03 | 4.51E-03 | 2011 Weak coupling between sulfate reduction and the anaerobic oxidation of methane in methane-rich seafloor sediments during ex situ incubation |
| Slope (200–2,000), 880 m | 5.05E-01 | 3.60E-03 | 5.48E-03 | 2011 Weak coupling between sulfate reduction and the anaerobic oxidation of methane in methane-rich seafloor sediments during ex situ incubation |
| Slope (200–2,000), 880 m | 4.89E-01 | 3.20E-03 | 5.03E-03 | 2011 Weak coupling between sulfate reduction and the anaerobic oxidation of methane in methane-rich seafloor sediments during ex situ incubation |
| Slope (200–2,000), 880 m | 1.26E-02 | 1.90E-03 | 1.16E-01 | 2011 Weak coupling between sulfate reduction and the anaerobic oxidation of methane in methane-rich seafloor sediments during ex situ incubation |
| Slope (200–2,000), 880 m | 2.38E-02 | 1.10E-03 | 3.55E-02 | 2011 Weak coupling between sulfate reduction and the anaerobic oxidation of methane in methane-rich seafloor sediments during ex situ incubation |
| Slope (200–2,000), 880 m | 3.36E-02 | 1.30E-03 | 2.97E-02 | 2011 Weak coupling between sulfate reduction and the anaerobic oxidation of methane in methane-rich seafloor sediments during ex situ incubation |
| Slope (200–2,000), 880 m | 3.19E-02 | 1.00E-04 | 2.41E-03 | 2011 Weak coupling between sulfate reduction and the anaerobic oxidation of methane in methane-rich seafloor sediments during ex situ incubation |
| Slope (200–2,000), 880 m | 1.52E-01 | 2.00E-04 | 1.01E-03 | 2011 Weak coupling between sulfate reduction and the anaerobic oxidation of methane in methane-rich seafloor sediments during ex situ incubation |
| Slope (200–2,000), 880 m | 7.00E-01 | 1.40E-03 | 1.54E-03 | 2011 Weak coupling between sulfate reduction and the anaerobic oxidation of methane in methane-rich seafloor sediments during ex situ incubation |
| Slope (200–2,000), 880 m | 1.33E-02 | 2.80E-03 | 1.62E-01 | 2011 Weak coupling between sulfate reduction and the anaerobic oxidation of methane in methane-rich seafloor sediments during ex situ incubation |
| Slope (200–2,000), 880 m | 2.67E-02 | 1.50E-03 | 4.32E-02 | 2011 Weak coupling between sulfate reduction and the anaerobic oxidation of methane in methane-rich seafloor sediments during ex situ incubation |
| Slope (200–2,000), 880 m | 1.31E-02 | 6.00E-04 | 3.53E-02 | 2011 Weak coupling between sulfate reduction and the anaerobic oxidation of methane in                                                           |

|                              |          |          |          |                                                                                                                                                                                             |
|------------------------------|----------|----------|----------|---------------------------------------------------------------------------------------------------------------------------------------------------------------------------------------------|
|                              |          |          |          | methane-rich seafloor sediments during ex situ incubation                                                                                                                                   |
| Slope (200–2,000), 880 m     | 5.55E-02 | 1.30E-03 | 1.80E-02 | 2011 Weak coupling between sulfate reduction and the anaerobic oxidation of methane in methane-rich seafloor sediments during ex situ incubation                                            |
| Slope (200–2,000), 880 m     | 2.29E-02 | 1.50E-03 | 5.03E-02 | 2011 Weak coupling between sulfate reduction and the anaerobic oxidation of methane in methane-rich seafloor sediments during ex situ incubatio                                             |
| Slope (200–2,000), 880 m     | 5.84E-02 | 6.00E-04 | 7.91E-03 | 2011 Weak coupling between sulfate reduction and the anaerobic oxidation of methane in methane-rich seafloor sediments during ex situ incubation                                            |
| Slope (200–2,000), 880 m     | 8.95E-01 | 2.30E-03 | 1.98E-03 | 2011 Weak coupling between sulfate reduction and the anaerobic oxidation of methane in methane-rich seafloor sediments during ex situ incubation                                            |
| Slope (200–2,000), 880 m     | 7.64E-01 | 1.30E-03 | 1.31E-03 | 2011 Weak coupling between sulfate reduction and the anaerobic oxidation of methane in methane-rich seafloor sediments during ex situ incubation                                            |
| Slope (200–2,000), 880 m     | 7.54E-01 | 1.40E-03 | 1.43E-03 | 2011 Weak coupling between sulfate reduction and the anaerobic oxidation of methane in methane-rich seafloor sediments during ex situ incubation                                            |
| Slope (200–2,000), 880 m     | 3.48E-01 | 3.00E-04 | 6.64E-04 | 2011 Weak coupling between sulfate reduction and the anaerobic oxidation of methane in methane-rich seafloor sediments during ex situ incubation                                            |
| Slope (200–2,000), 880 m     | 5.05E-01 | 6.00E-04 | 9.14E-04 | 2011 Weak coupling between sulfate reduction and the anaerobic oxidation of methane in methane-rich seafloor sediments during ex situ incubation                                            |
| Outer shelf (50–200), 71 m   | 4.15E-01 | 3.90E-03 | 7.24E-03 | 2017 Methane as an Organic Matter Source and the Trophic Basis of a Laptev Sea Cold Seep Microbial Community                                                                                |
| Outer shelf (50–200), 100 m  | 1.00E+00 | 1.80E-03 | 1.20E-03 | 2018 Anaerobic methane oxidation inducing carbonate precipitation at abiogenic methane seeps in the Tuscan archipelago                                                                      |
| Slope (200–2,000), 280/340 m | 1.00E+00 | 8.00E-03 | 5.41E-03 | 2014 Sulfate reduction and methane oxidation activity below the sulfate-methane transition zone in Alaskan Beaufort Sea continental margin sediments: Implications for deep sulfur cycling. |
| Slope (200–2,000), 1400 m    | 4.33E-01 | 1.50E-02 | -        | 2021 Depth profiles of geochemical features, geochemical activities and biodiversity of microbial communities in marine sediments from the Shenhua area, the northern South China Sea       |
| Slope (200–2,000), 1400 m    | 2.27E-03 | 1.42E-06 | 4.83E-04 | 2018 Carbon and sulfur cycling rate measurements and geochemistry from three sites in the northern South China Sea                                                                          |
| Slope (200–2,000), 1400 m    | 2.39E-03 | 5.43E-07 | 1.75E-04 | 2018 Carbon and sulfur cycling rate measurements and geochemistry from three sites in the northern South China Sea                                                                          |
| Slope (200–2,000), 1400 m    | 2.36E-03 | 4.79E-07 | 1.57E-04 | 2018 Carbon and sulfur cycling rate measurements and geochemistry from three sites in the northern South China Sea                                                                          |
| Slope (200–2,000), 1400 m    | 3.14E-03 | 4.35E-07 | 1.07E-04 | 2018 Carbon and sulfur cycling rate measurements and geochemistry from three sites in the northern South China Sea                                                                          |
| Slope (200–2,000), 1400 m    | 3.08E-03 | 9.06E-07 | 2.26E-04 | 2018 Carbon and sulfur cycling rate measurements and geochemistry from three sites in the northern South China Sea                                                                          |
| Slope (200–2,000), 1400 m    | 3.62E-03 | 1.06E-06 | 2.24E-04 | 2018 Carbon and sulfur cycling rate measurements and geochemistry from three sites                                                                                                          |

|                           |          |          |          |                                                                                                                                                            |
|---------------------------|----------|----------|----------|------------------------------------------------------------------------------------------------------------------------------------------------------------|
|                           |          |          |          | in the northern South China Sea                                                                                                                            |
| Slope (200–2,000), 1400 m | 5.28E-03 | 6.49E-07 | 9.46E-05 | 2018 Carbon and sulfur cycling rate measurements and geochemistry from three sites in the northern South China Sea                                         |
| Slope (200–2,000), 1400 m | 4.33E-03 | 9.04E-07 | 1.61E-04 | 2018 Carbon and sulfur cycling rate measurements and geochemistry from three sites in the northern South China Sea                                         |
| Slope (200–2,000), 1400 m | 3.57E-03 | 5.68E-07 | 1.22E-04 | 2018 Carbon and sulfur cycling rate measurements and geochemistry from three sites in the northern South China Sea                                         |
| Slope (200–2,000), 1400 m | 4.46E-03 | 1.03E-06 | 1.77E-04 | 2018 Carbon and sulfur cycling rate measurements and geochemistry from three sites in the northern South China Sea                                         |
| Slope (200–2,000), 1400 m | 4.95E-03 | 6.16E-07 | 9.57E-05 | 2018 Carbon and sulfur cycling rate measurements and geochemistry from three sites in the northern South China Sea                                         |
| Slope (200–2,000), 1400 m | 4.98E-03 | 5.14E-07 | 7.93E-05 | 2018 Carbon and sulfur cycling rate measurements and geochemistry from three sites in the northern South China Sea                                         |
| Slope (200–2,000), 1400 m | 5.17E-03 | 4.97E-07 | 7.38E-05 | 2018 Carbon and sulfur cycling rate measurements and geochemistry from three sites in the northern South China Sea                                         |
| Slope (200–2,000), 1400 m | 6.66E-03 | 6.42E-07 | 7.42E-05 | 2018 Carbon and sulfur cycling rate measurements and geochemistry from three sites in the northern South China Sea                                         |
| Slope (200–2,000), 1400 m | 6.23E-03 | 6.64E-07 | 8.20E-05 | 2018 Carbon and sulfur cycling rate measurements and geochemistry from three sites in the northern South China Sea                                         |
| Slope (200–2,000), 1400 m | 6.96E-03 | 7.50E-07 | 8.29E-05 | 2018 Carbon and sulfur cycling rate measurements and geochemistry from three sites in the northern South China Sea                                         |
| Slope (200–2,000), 1400 m | 5.72E-03 | 5.49E-07 | 7.37E-05 | 2018 Carbon and sulfur cycling rate measurements and geochemistry from three sites in the northern South China Sea                                         |
| Slope (200–2,000), 1400 m | 3.03E-03 | 6.72E-03 | 1.71E+00 | 2018 Carbon and sulfur cycling rate measurements and geochemistry from three sites in the northern South China Sea                                         |
| Slope (200–2,000), 1400 m | 5.29E-03 | 4.27E-03 | 6.21E-01 | 2018 Carbon and sulfur cycling rate measurements and geochemistry from three sites in the northern South China Sea                                         |
| Slope (200–2,000), 1400 m | 2.23E-03 | 4.74E-03 | 1.63E+00 | 2018 Carbon and sulfur cycling rate measurements and geochemistry from three sites in the northern South China Sea                                         |
| Slope (200–2,000), 1400 m | 2.06E-03 | 5.14E-03 | 1.92E+00 | 2018 Carbon and sulfur cycling rate measurements and geochemistry from three sites in the northern South China Sea                                         |
| Slope (200–2,000), 1400 m | 2.74E-03 | 4.93E-03 | 1.38E+00 | 2018 Carbon and sulfur cycling rate measurements and geochemistry from three sites in the northern South China Sea                                         |
| Slope (200–2,000), 1400 m | 2.29E-03 | 4.22E-03 | 1.42E+00 | 2018 Carbon and sulfur cycling rate measurements and geochemistry from three sites in the northern South China Sea                                         |
| Slope (200–2,000),585 m   | 5.81E-03 | 5.25E-06 | 6.95E-04 | 2019 Sediment geochemistry and process rate measurements aboard the R/V Endeavor cruise EN586 in the northern Gulf of Mexico from 2016-07-26 to 2016-08-14 |
| Slope (200–2,000),585 m   | 3.14E-03 | 2.20E-06 | 5.38E-04 | 2019 Sediment geochemistry and process rate measurements aboard the R/V Endeavor cruise EN586 in the northern Gulf of Mexico from 2016-07-26 to 2016-08-14 |
| Slope (200–2,000),585 m   | 3.67E-03 | 1.84E-06 | 3.85E-04 | 2019 Sediment geochemistry and process rate measurements aboard the R/V Endeavor cruise EN586 in the northern Gulf of Mexico from 2016-07-26 to 2016-08-14 |
| Slope (200–2,000),585 m   | 3.32E-03 | 1.45E-06 | 3.35E-04 | 2019 Sediment geochemistry and process rate                                                                                                                |

|                          |          |          |          |                                                                                                                                                            |
|--------------------------|----------|----------|----------|------------------------------------------------------------------------------------------------------------------------------------------------------------|
|                          |          |          |          | measurements aboard the R/V Endeavor cruise EN586 in the northern Gulf of Mexico from 2016-07-26 to 2016-08-14                                             |
| Slope (200–2,000),585 m  | 3.25E-03 | 1.13E-06 | 2.67E-04 | 2019 Sediment geochemistry and process rate measurements aboard the R/V Endeavor cruise EN586 in the northern Gulf of Mexico from 2016-07-26 to 2016-08-14 |
| Slope (200–2,000),585 m  | 4.04E-03 | 9.39E-07 | 1.79E-04 | 2019 Sediment geochemistry and process rate measurements aboard the R/V Endeavor cruise EN586 in the northern Gulf of Mexico from 2016-07-26 to 2016-08-14 |
| Slope (200–2,000),585 m  | 3.03E-03 | 5.64E-06 | 1.43E-03 | 2019 Sediment geochemistry and process rate measurements aboard the R/V Endeavor cruise EN586 in the northern Gulf of Mexico from 2016-07-26 to 2016-08-14 |
| Slope (200–2,000),585 m  | 4.45E-03 | 9.32E-07 | 1.61E-04 | 2019 Sediment geochemistry and process rate measurements aboard the R/V Endeavor cruise EN586 in the northern Gulf of Mexico from 2016-07-26 to 2016-08-14 |
| Slope (200–2,000),585 m  | 3.64E-03 | 7.95E-07 | 1.68E-04 | 2019 Sediment geochemistry and process rate measurements aboard the R/V Endeavor cruise EN586 in the northern Gulf of Mexico from 2016-07-26 to 2016-08-14 |
| Slope (200–2,000),803 m  | 1.16E-03 | 1.61E-05 | 1.07E-02 | 2019 Sediment geochemistry and process rate measurements aboard the R/V Endeavor cruise EN586 in the northern Gulf of Mexico from 2016-07-26 to 2016-08-14 |
| Slope (200–2,000),803 m  | 4.52E-03 | 1.32E-05 | 2.24E-03 | 2019 Sediment geochemistry and process rate measurements aboard the R/V Endeavor cruise EN586 in the northern Gulf of Mexico from 2016-07-26 to 2016-08-14 |
| Slope (200–2,000),803 m  | 5.02E-03 | 9.26E-07 | 1.42E-04 | 2019 Sediment geochemistry and process rate measurements aboard the R/V Endeavor cruise EN586 in the northern Gulf of Mexico from 2016-07-26 to 2016-08-14 |
| Slope (200–2,000),1210 m | 2.13E-02 | 5.60E-05 | 2.03E-03 | 2019 Sediment geochemistry and process rate measurements aboard the R/V Endeavor cruise EN586 in the northern Gulf of Mexico from 2016-07-26 to 2016-08-14 |
| Slope (200–2,000),1210 m | 8.20E-02 | 5.62E-04 | 5.27E-03 | 2019 Sediment geochemistry and process rate measurements aboard the R/V Endeavor cruise EN586 in the northern Gulf of Mexico from 2016-07-26 to 2016-08-14 |
| Slope (200–2,000),1210 m | 1.12E-01 | 1.31E-03 | 8.97E-03 | 2019 Sediment geochemistry and process rate measurements aboard the R/V Endeavor cruise EN586 in the northern Gulf of Mexico from 2016-07-26 to 2016-08-14 |
| Slope (200–2,000),1210 m | 2.92E-01 | 1.63E-03 | 4.30E-03 | 2019 Sediment geochemistry and process rate measurements aboard the R/V Endeavor cruise EN586 in the northern Gulf of Mexico from 2016-07-26 to 2016-08-14 |
| Slope (200–2,000),1210 m | 3.41E-01 | 5.36E-03 | 1.21E-02 | 2019 Sediment geochemistry and process rate measurements aboard the R/V Endeavor cruise EN586 in the northern Gulf of Mexico from 2016-07-26 to 2016-08-14 |
| Slope (200–2,000),1210 m | 4.64E-01 | 2.28E-03 | 3.78E-03 | 2019 Sediment geochemistry and process rate measurements aboard the R/V Endeavor cruise EN586 in the northern Gulf of Mexico from 2016-07-26 to 2016-08-14 |
| Slope (200–2,000),1210 m | 7.04E-01 | 5.21E-04 | 5.69E-04 | 2019 Sediment geochemistry and process rate measurements aboard the R/V Endeavor cruise EN586 in the northern Gulf of Mexico from 2016-07-26 to 2016-08-14 |
| Slope (200–2,000),1526 m | 1.80E-03 | 7.44E-07 | 3.17E-04 | 2019 Sediment geochemistry and process rate measurements aboard the R/V Endeavor cruise EN586 in the northern Gulf of Mexico from                          |

|                             |          |          |          |                                                                                                                                                            |
|-----------------------------|----------|----------|----------|------------------------------------------------------------------------------------------------------------------------------------------------------------|
|                             |          |          |          | 2016-07-26 to 2016-08-14                                                                                                                                   |
| Slope (200–2,000),1526 m    | 1.90E-03 | 1.92E-06 | 7.75E-04 | 2019 Sediment geochemistry and process rate measurements aboard the R/V Endeavor cruise EN586 in the northern Gulf of Mexico from 2016-07-26 to 2016-08-14 |
| Slope (200–2,000),1526 m    | 2.54E-03 | 1.94E-06 | 5.86E-04 | 2019 Sediment geochemistry and process rate measurements aboard the R/V Endeavor cruise EN586 in the northern Gulf of Mexico from 2016-07-26 to 2016-08-14 |
| Slope (200–2,000),1526 m    | 1.97E-03 | 8.26E-07 | 3.23E-04 | 2019 Sediment geochemistry and process rate measurements aboard the R/V Endeavor cruise EN586 in the northern Gulf of Mexico from 2016-07-26 to 2016-08-14 |
| Slope (200–2,000),1526 m    | 3.01E-03 | 9.88E-07 | 2.53E-04 | 2019 Sediment geochemistry and process rate measurements aboard the R/V Endeavor cruise EN586 in the northern Gulf of Mexico from 2016-07-26 to 2016-08-14 |
| Slope (200–2,000),1526 m    | 2.20E-03 | 5.13E-07 | 1.79E-04 | 2019 Sediment geochemistry and process rate measurements aboard the R/V Endeavor cruise EN586 in the northern Gulf of Mexico from 2016-07-26 to 2016-08-14 |
| Slope (200–2,000),1372 m    | 3.57E-03 | 1.31E-05 | 2.82E-03 | 2019 Sediment geochemistry and process rate measurements aboard the R/V Endeavor cruise EN586 in the northern Gulf of Mexico from 2016-07-26 to 2016-08-14 |
| Slope (200–2,000),1372 m    | 7.01E-03 | 1.67E-05 | 1.83E-03 | 2019 Sediment geochemistry and process rate measurements aboard the R/V Endeavor cruise EN586 in the northern Gulf of Mexico from 2016-07-26 to 2016-08-14 |
| Slope (200–2,000),1372 m    | 8.92E-03 | 4.62E-06 | 3.98E-04 | 2019 Sediment geochemistry and process rate measurements aboard the R/V Endeavor cruise EN586 in the northern Gulf of Mexico from 2016-07-26 to 2016-08-14 |
| Slope (200–2,000),1372 m    | 1.15E-02 | 5.07E-06 | 3.40E-04 | 2019 Sediment geochemistry and process rate measurements aboard the R/V Endeavor cruise EN586 in the northern Gulf of Mexico from 2016-07-26 to 2016-08-14 |
| Slope (200–2,000),1372 m    | 9.17E-03 | 3.44E-06 | 2.89E-04 | 2019 Sediment geochemistry and process rate measurements aboard the R/V Endeavor cruise EN586 in the northern Gulf of Mexico from 2016-07-26 to 2016-08-14 |
| Slope (200–2,000),1372 m    | 1.13E-02 | 5.11E-06 | 3.48E-04 | 2019 Sediment geochemistry and process rate measurements aboard the R/V Endeavor cruise EN586 in the northern Gulf of Mexico from 2016-07-26 to 2016-08-14 |
| Slope (200–2,000),1372 m    | 8.39E-03 | 3.51E-06 | 3.22E-04 | 2019 Sediment geochemistry and process rate measurements aboard the R/V Endeavor cruise EN586 in the northern Gulf of Mexico from 2016-07-26 to 2016-08-14 |
| Outer shelf (50–200), 123 m | 2.64E-03 | 3.81E-06 | 1.11E-03 | 2019 Sediment geochemistry and process rate measurements aboard the R/V Endeavor cruise EN586 in the northern Gulf of Mexico from 2016-07-26 to 2016-08-14 |
| Outer shelf (50–200), 123 m | 3.97E-03 | 5.38E-06 | 1.04E-03 | 2019 Sediment geochemistry and process rate measurements aboard the R/V Endeavor cruise EN586 in the northern Gulf of Mexico from 2016-07-26 to 2016-08-14 |
| Outer shelf (50–200), 123 m | 4.38E-03 | 7.81E-06 | 1.37E-03 | 2019 Sediment geochemistry and process rate measurements aboard the R/V Endeavor cruise EN586 in the northern Gulf of Mexico from 2016-07-26 to 2016-08-14 |
| Outer shelf (50–200), 123 m | 3.73E-03 | 4.80E-06 | 9.89E-04 | 2019 Sediment geochemistry and process rate measurements aboard the R/V Endeavor cruise EN586 in the northern Gulf of Mexico from 2016-07-26 to 2016-08-14 |

|                             |          |          |          |                                                                                                                                                            |
|-----------------------------|----------|----------|----------|------------------------------------------------------------------------------------------------------------------------------------------------------------|
| Outer shelf (50–200), 123 m | 5.44E-03 | 6.20E-06 | 8.77E-04 | 2019 Sediment geochemistry and process rate measurements aboard the R/V Endeavor cruise EN586 in the northern Gulf of Mexico from 2016-07-26 to 2016-08-14 |
| Outer shelf (50–200), 123 m | 3.23E-03 | 3.82E-06 | 9.10E-04 | 2019 Sediment geochemistry and process rate measurements aboard the R/V Endeavor cruise EN586 in the northern Gulf of Mexico from 2016-07-26 to 2016-08-14 |
| Outer shelf (50–200), 123 m | 4.40E-03 | 6.41E-06 | 1.12E-03 | 2019 Sediment geochemistry and process rate measurements aboard the R/V Endeavor cruise EN586 in the northern Gulf of Mexico from 2016-07-26 to 2016-08-14 |
| Slope (200–2,000),1634 m    | 2.26E-03 | 2.51E-06 | 8.52E-04 | 2019 Sediment geochemistry and process rate measurements aboard the R/V Endeavor cruise EN586 in the northern Gulf of Mexico from 2016-07-26 to 2016-08-14 |
| Slope (200–2,000),1634 m    | 2.30E-03 | 1.56E-06 | 5.22E-04 | 2019 Sediment geochemistry and process rate measurements aboard the R/V Endeavor cruise EN586 in the northern Gulf of Mexico from 2016-07-26 to 2016-08-14 |
| Slope (200–2,000),1634 m    | 1.58E-03 | 9.59E-07 | 4.67E-04 | 2019 Sediment geochemistry and process rate measurements aboard the R/V Endeavor cruise EN586 in the northern Gulf of Mexico from 2016-07-26 to 2016-08-14 |
| Slope (200–2,000),1634 m    | 2.76E-03 | 1.51E-06 | 4.21E-04 | 2019 Sediment geochemistry and process rate measurements aboard the R/V Endeavor cruise EN586 in the northern Gulf of Mexico from 2016-07-26 to 2016-08-14 |
| Slope (200–2,000),1634 m    | 1.53E-03 | 7.36E-07 | 3.71E-04 | 2019 Sediment geochemistry and process rate measurements aboard the R/V Endeavor cruise EN586 in the northern Gulf of Mexico from 2016-07-26 to 2016-08-14 |
| Slope (200–2,000),1634 m    | 2.56E-03 | 1.08E-06 | 3.25E-04 | 2019 Sediment geochemistry and process rate measurements aboard the R/V Endeavor cruise EN586 in the northern Gulf of Mexico from 2016-07-26 to 2016-08-14 |
| Slope (200–2,000),1634 m    | 2.62E-03 | 1.02E-06 | 2.98E-04 | 2019 Sediment geochemistry and process rate measurements aboard the R/V Endeavor cruise EN586 in the northern Gulf of Mexico from 2016-07-26 to 2016-08-14 |
| Slope (200–2,000),1634 m    | 1.90E-03 | 7.40E-07 | 2.99E-04 | 2019 Sediment geochemistry and process rate measurements aboard the R/V Endeavor cruise EN586 in the northern Gulf of Mexico from 2016-07-26 to 2016-08-14 |
| Slope (200–2,000),1053 m    | 4.11E-03 | 1.24E-06 | 2.33E-04 | 2019 Sediment geochemistry and process rate measurements aboard the R/V Endeavor cruise EN586 in the northern Gulf of Mexico from 2016-07-26 to 2016-08-14 |
| Slope (200–2,000),1053 m    | 9.28E-02 | 2.33E-05 | 1.93E-04 | 2019 Sediment geochemistry and process rate measurements aboard the R/V Endeavor cruise EN586 in the northern Gulf of Mexico from 2016-07-26 to 2016-08-14 |
| Slope (200–2,000),1543 m    | 1.50E-03 | 5.32E-07 | 2.73E-04 | 2019 Sediment geochemistry and process rate measurements aboard the R/V Endeavor cruise EN586 in the northern Gulf of Mexico from 2016-07-26 to 2016-08-14 |
| Slope (200–2,000),1306 m    | 1.77E-03 | 8.66E-07 | 3.75E-04 | 2019 Sediment geochemistry and process rate measurements aboard the R/V Endeavor cruise EN586 in the northern Gulf of Mexico from 2016-07-26 to 2016-08-14 |
| Slope (200–2,000),1306 m    | 1.49E-02 | 7.76E-06 | 4.00E-04 | 2019 Sediment geochemistry and process rate measurements aboard the R/V Endeavor cruise EN586 in the northern Gulf of Mexico from 2016-07-26 to 2016-08-14 |
| Slope (200–2,000),1306 m    | 1.16E-02 | 6.05E-06 | 4.01E-04 | 2019 Sediment geochemistry and process rate measurements aboard the R/V Endeavor cruise                                                                    |

|                            |          |          |          |                                                                                                                                                            |
|----------------------------|----------|----------|----------|------------------------------------------------------------------------------------------------------------------------------------------------------------|
|                            |          |          |          | EN586 in the northern Gulf of Mexico from 2016-07-26 to 2016-08-14                                                                                         |
| Slope (200–2,000),1306 m   | 1.84E-02 | 1.04E-05 | 4.33E-04 | 2019 Sediment geochemistry and process rate measurements aboard the R/V Endeavor cruise EN586 in the northern Gulf of Mexico from 2016-07-26 to 2016-08-14 |
| Slope (200–2,000),1306 m   | 2.28E-02 | 1.16E-05 | 3.90E-04 | 2019 Sediment geochemistry and process rate measurements aboard the R/V Endeavor cruise EN586 in the northern Gulf of Mexico from 2016-07-26 to 2016-08-14 |
| Slope (200–2,000),1366 m   | 3.22E-03 | 6.51E-06 | 1.56E-03 | 2019 Sediment geochemistry and process rate measurements aboard the R/V Endeavor cruise EN586 in the northern Gulf of Mexico from 2016-07-26 to 2016-08-14 |
| Slope (200–2,000),1366 m   | 3.47E-03 | 2.18E-06 | 4.83E-04 | 2019 Sediment geochemistry and process rate measurements aboard the R/V Endeavor cruise EN586 in the northern Gulf of Mexico from 2016-07-26 to 2016-08-14 |
| Slope (200–2,000),880 m    | 1.35E-02 | 4.58E-05 | 2.61E-03 | 2019 Sediment geochemistry and process rate measurements aboard the R/V Endeavor cruise EN586 in the northern Gulf of Mexico from 2016-07-26 to 2016-08-14 |
| Slope (200–2,000),880 m    | 1.44E-02 | 7.92E-05 | 4.22E-03 | 2019 Sediment geochemistry and process rate measurements aboard the R/V Endeavor cruise EN586 in the northern Gulf of Mexico from 2016-07-26 to 2016-08-14 |
| Slope (200–2,000),880 m    | 4.91E-02 | 1.89E-03 | 2.96E-02 | 2019 Sediment geochemistry and process rate measurements aboard the R/V Endeavor cruise EN586 in the northern Gulf of Mexico from 2016-07-26 to 2016-08-14 |
| Slope (200–2,000),880 m    | 3.87E-02 | 1.13E-03 | 2.26E-02 | 2019 Sediment geochemistry and process rate measurements aboard the R/V Endeavor cruise EN586 in the northern Gulf of Mexico from 2016-07-26 to 2016-08-14 |
| Slope (200–2,000),880 m    | 3.91E-01 | 6.36E-03 | 1.25E-02 | 2019 Sediment geochemistry and process rate measurements aboard the R/V Endeavor cruise EN586 in the northern Gulf of Mexico from 2016-07-26 to 2016-08-14 |
| Rise (2,000–3,500), 2300 m | 4.42E-01 | 3.00E-05 | 5.22E-05 | 2016 R/V Endeavor: EN528 Water and Sediment Chemistry, Gulf of Mexico, July 7-22, 2013                                                                     |
| Rise (2,000–3,500), 2300 m | 4.26E-01 | 3.16E-06 | 5.71E-06 | 2016 R/V Endeavor: EN528 Water and Sediment Chemistry, Gulf of Mexico, July 7-22, 2013                                                                     |
| Rise (2,000–3,500), 2300 m | 3.72E-01 | 4.09E-03 | 8.46E-03 | 2016 R/V Endeavor: EN528 Water and Sediment Chemistry, Gulf of Mexico, July 7-22, 2013                                                                     |
| Rise (2,000–3,500), 2300 m | 4.29E-01 | 1.32E-06 | 2.38E-06 | 2016 R/V Endeavor: EN528 Water and Sediment Chemistry, Gulf of Mexico, July 7-22, 2013                                                                     |
| Rise (2,000–3,500), 2300 m | 2.96E-01 | 7.38E-04 | 1.92E-03 | 2016 R/V Endeavor: EN528 Water and Sediment Chemistry, Gulf of Mexico, July 7-22, 2013                                                                     |
| Rise (2,000–3,500), 2300 m | 3.21E-01 | 3.36E-03 | 8.06E-03 | 2016 R/V Endeavor: EN528 Water and Sediment Chemistry, Gulf of Mexico, July 7-22, 2013                                                                     |
| Rise (2,000–3,500), 2300 m | 2.78E-01 | 1.50E-05 | 4.15E-05 | 2016 R/V Endeavor: EN528 Water and Sediment Chemistry, Gulf of Mexico, July 7-22, 2013                                                                     |
| Rise (2,000–3,500), 2300 m | 2.39E-01 | 3.19E-06 | 1.03E-05 | 2016 R/V Endeavor: EN528 Water and Sediment Chemistry, Gulf of Mexico, July 7-22, 2013                                                                     |
| Slope (200–2,000), 1046 m  | 1.06E+00 | 6.46E-02 | 4.69E-02 | 2016 R/V Endeavor: EN528 Water and Sediment Chemistry, Gulf of Mexico, July 7-22, 2013                                                                     |

|                           |          |          |          |                                                                                        |
|---------------------------|----------|----------|----------|----------------------------------------------------------------------------------------|
| Slope (200–2,000), 1062 m | 5.00E-03 | 2.22E-06 | 3.41E-04 | 2016 R/V Endeavor: EN528 Water and Sediment Chemistry, Gulf of Mexico, July 7-22, 2013 |
| Slope (200–2,000), 1062 m | 6.15E-03 | 2.09E-06 | 2.62E-04 | 2016 R/V Endeavor: EN528 Water and Sediment Chemistry, Gulf of Mexico, July 7-22, 2013 |
| Slope (200–2,000), 1062 m | 7.78E-03 | 2.99E-06 | 2.96E-04 | 2016 R/V Endeavor: EN528 Water and Sediment Chemistry, Gulf of Mexico, July 7-22, 2013 |
| Slope (200–2,000), 1062 m | 7.91E-03 | 4.81E-06 | 4.68E-04 | 2016 R/V Endeavor: EN528 Water and Sediment Chemistry, Gulf of Mexico, July 7-22, 2013 |
| Slope (200–2,000), 1062 m | 6.74E-03 | 3.21E-06 | 3.67E-04 | 2016 R/V Endeavor: EN528 Water and Sediment Chemistry, Gulf of Mexico, July 7-22, 2013 |
| Slope (200–2,000), 1062 m | 7.28E-03 | 7.38E-06 | 7.80E-04 | 2016 R/V Endeavor: EN528 Water and Sediment Chemistry, Gulf of Mexico, July 7-22, 2013 |
| Slope (200–2,000), 1062 m | 1.19E-02 | 5.08E-06 | 3.27E-04 | 2016 R/V Endeavor: EN528 Water and Sediment Chemistry, Gulf of Mexico, July 7-22, 2013 |
| Slope (200–2,000), 1062 m | 8.73E-03 | 2.43E-06 | 2.14E-04 | 2016 R/V Endeavor: EN528 Water and Sediment Chemistry, Gulf of Mexico, July 7-22, 2013 |
| Slope (200–2,000),595 m   | 3.10E-03 | 2.52E-06 | 6.26E-04 | 2016 R/V Endeavor: EN528 Water and Sediment Chemistry, Gulf of Mexico, July 7-22, 2013 |
| Slope (200–2,000),595 m   | 4.05E-03 | 2.46E-06 | 4.67E-04 | 2016 R/V Endeavor: EN528 Water and Sediment Chemistry, Gulf of Mexico, July 7-22, 2013 |
| Slope (200–2,000),595 m   | 5.26E-03 | 6.24E-06 | 9.13E-04 | 2016 R/V Endeavor: EN528 Water and Sediment Chemistry, Gulf of Mexico, July 7-22, 2013 |
| Slope (200–2,000),595 m   | 5.33E-03 | 4.14E-06 | 5.98E-04 | 2016 R/V Endeavor: EN528 Water and Sediment Chemistry, Gulf of Mexico, July 7-22, 2013 |
| Slope (200–2,000),595 m   | 5.61E-03 | 4.62E-06 | 6.33E-04 | 2016 R/V Endeavor: EN528 Water and Sediment Chemistry, Gulf of Mexico, July 7-22, 2013 |
| Slope (200–2,000),595 m   | 5.80E-03 | 5.16E-06 | 6.85E-04 | 2016 R/V Endeavor: EN528 Water and Sediment Chemistry, Gulf of Mexico, July 7-22, 2013 |
| Slope (200–2,000),595 m   | 5.27E-03 | 1.73E-06 | 2.52E-04 | 2016 R/V Endeavor: EN528 Water and Sediment Chemistry, Gulf of Mexico, July 7-22, 2013 |
| Slope (200–2,000),567 m   | 4.14E-03 | 2.92E-06 | 5.43E-04 | 2016 R/V Endeavor: EN528 Water and Sediment Chemistry, Gulf of Mexico, July 7-22, 2013 |
| Slope (200–2,000),567 m   | 4.41E-03 | 1.23E-06 | 2.14E-04 | 2016 R/V Endeavor: EN528 Water and Sediment Chemistry, Gulf of Mexico, July 7-22, 2013 |
| Slope (200–2,000),567 m   | 4.85E-03 | 9.45E-06 | 1.50E-03 | 2016 R/V Endeavor: EN528 Water and Sediment Chemistry, Gulf of Mexico, July 7-22, 2013 |
| Slope (200–2,000),567 m   | 5.67E-03 | 1.52E-06 | 2.06E-04 | 2016 R/V Endeavor: EN528 Water and Sediment Chemistry, Gulf of Mexico, July 7-22, 2013 |
| Slope (200–2,000),567 m   | 6.76E-03 | 2.02E-06 | 2.29E-04 | 2016 R/V Endeavor: EN528 Water and Sediment Chemistry, Gulf of Mexico, July 7-22, 2013 |
| Slope (200–2,000),567 m   | 9.78E-03 | 1.46E-06 | 1.15E-04 | 2016 R/V Endeavor: EN528 Water and Sediment Chemistry, Gulf of Mexico, July 7-22, 2013 |
| Slope (200–2,000),567 m   | 1.12E-02 | 1.36E-06 | 9.34E-05 | 2016 R/V Endeavor: EN528 Water and Sediment Chemistry, Gulf of Mexico, July 7-22, 2013 |

|                             |          |          |          |                                                                                        |
|-----------------------------|----------|----------|----------|----------------------------------------------------------------------------------------|
|                             |          |          |          | 2013                                                                                   |
| Slope (200–2,000),609 m     | 3.86E-03 | 2.98E-06 | 5.94E-04 | 2016 R/V Endeavor: EN528 Water and Sediment Chemistry, Gulf of Mexico, July 7-22, 2013 |
| Slope (200–2,000),609 m     | 6.11E-03 | 3.25E-06 | 4.09E-04 | 2016 R/V Endeavor: EN528 Water and Sediment Chemistry, Gulf of Mexico, July 7-22, 2013 |
| Slope (200–2,000),609 m     | 4.81E-03 | 2.99E-06 | 4.78E-04 | 2016 R/V Endeavor: EN528 Water and Sediment Chemistry, Gulf of Mexico, July 7-22, 2013 |
| Slope (200–2,000),609 m     | 4.95E-03 | 2.74E-06 | 4.26E-04 | 2016 R/V Endeavor: EN528 Water and Sediment Chemistry, Gulf of Mexico, July 7-22, 2013 |
| Slope (200–2,000),609 m     | 4.64E-03 | 2.35E-06 | 3.90E-04 | 2016 R/V Endeavor: EN528 Water and Sediment Chemistry, Gulf of Mexico, July 7-22, 2013 |
| Slope (200–2,000),609 m     | 7.89E-03 | 1.20E-05 | 1.17E-03 | 2016 R/V Endeavor: EN528 Water and Sediment Chemistry, Gulf of Mexico, July 7-22, 2013 |
| Slope (200–2,000),609 m     | 3.82E-03 | 1.51E-06 | 3.03E-04 | 2016 R/V Endeavor: EN528 Water and Sediment Chemistry, Gulf of Mexico, July 7-22, 2013 |
| Slope (200–2,000),609 m     | 4.82E-03 | 2.23E-06 | 3.56E-04 | 2016 R/V Endeavor: EN528 Water and Sediment Chemistry, Gulf of Mexico, July 7-22, 2013 |
| Slope (200–2,000),287 m     | 2.74E-03 | 1.70E-06 | 4.76E-04 | 2016 R/V Endeavor: EN528 Water and Sediment Chemistry, Gulf of Mexico, July 7-22, 2013 |
| Slope (200–2,000),287 m     | 3.46E-03 | 2.24E-06 | 4.98E-04 | 2016 R/V Endeavor: EN528 Water and Sediment Chemistry, Gulf of Mexico, July 7-22, 2013 |
| Slope (200–2,000),287 m     | 4.44E-03 | 2.46E-06 | 4.25E-04 | 2016 R/V Endeavor: EN528 Water and Sediment Chemistry, Gulf of Mexico, July 7-22, 2013 |
| Slope (200–2,000),287 m     | 4.01E-03 | 1.93E-06 | 3.70E-04 | 2016 R/V Endeavor: EN528 Water and Sediment Chemistry, Gulf of Mexico, July 7-22, 2013 |
| Slope (200–2,000),287 m     | 4.46E-03 | 2.45E-06 | 4.23E-04 | 2016 R/V Endeavor: EN528 Water and Sediment Chemistry, Gulf of Mexico, July 7-22, 2013 |
| Slope (200–2,000),287 m     | 4.45E-03 | 1.58E-06 | 2.73E-04 | 2016 R/V Endeavor: EN528 Water and Sediment Chemistry, Gulf of Mexico, July 7-22, 2013 |
| Slope (200–2,000),287 m     | 4.34E-03 | 2.00E-06 | 3.55E-04 | 2016 R/V Endeavor: EN528 Water and Sediment Chemistry, Gulf of Mexico, July 7-22, 2013 |
| Slope (200–2,000),287 m     | 5.54E-03 | 1.89E-06 | 2.63E-04 | 2016 R/V Endeavor: EN528 Water and Sediment Chemistry, Gulf of Mexico, July 7-22, 2013 |
| Outer shelf (50–200), 147 m | 4.16E-03 | 4.06E-06 | 7.49E-04 | 2016 R/V Endeavor: EN528 Water and Sediment Chemistry, Gulf of Mexico, July 7-22, 2013 |
| Outer shelf (50–200), 147 m | 5.46E-03 | 3.64E-06 | 5.13E-04 | 2016 R/V Endeavor: EN528 Water and Sediment Chemistry, Gulf of Mexico, July 7-22, 2013 |
| Outer shelf (50–200), 147 m | 4.54E-03 | 2.51E-06 | 4.24E-04 | 2016 R/V Endeavor: EN528 Water and Sediment Chemistry, Gulf of Mexico, July 7-22, 2013 |
| Outer shelf (50–200), 147 m | 6.25E-03 | 2.59E-06 | 3.19E-04 | 2016 R/V Endeavor: EN528 Water and Sediment Chemistry, Gulf of Mexico, July 7-22, 2013 |
| Outer shelf (50–200), 147 m | 6.97E-03 | 2.81E-06 | 3.10E-04 | 2016 R/V Endeavor: EN528 Water and Sediment Chemistry, Gulf of Mexico, July 7-22, 2013 |
| Outer shelf (50–200), 147   | 7.13E-03 | 4.12E-06 | 4.45E-04 | 2016 R/V Endeavor: EN528 Water and                                                     |

|                             |          |          |          |                                                                                                                |
|-----------------------------|----------|----------|----------|----------------------------------------------------------------------------------------------------------------|
| m                           |          |          |          | Sediment Chemistry, Gulf of Mexico, July 7-22, 2013                                                            |
| Outer shelf (50–200), 147 m | 7.63E-03 | 3.12E-06 | 3.14E-04 | 2016 R/V Endeavor: EN528 Water and Sediment Chemistry, Gulf of Mexico, July 7-22, 2013                         |
| Outer shelf (50–200), 147 m | 9.30E-03 | 3.39E-06 | 2.80E-04 | 2016 R/V Endeavor: EN528 Water and Sediment Chemistry, Gulf of Mexico, July 7-22, 2013                         |
| inner shelf (10-50m) 28 m   | -        | 5.00E-03 | -        | 2005 Environmental control on anaerobic oxidation of methane in the gassy sediments of Eckernförde Bay         |
| inner shelf (10-50m) 28 m   | -        | 1.00E-04 | -        | 2005 Environmental control on anaerobic oxidation of methane in the gassy sediments of Eckernförde Bay         |
| Rise (2,000–3,500), 3200 m  | -        | 9.13E-10 | -        | 2011 Quantitative analysis of anaerobic oxidation of methane (AOM) in marine sediments: A modeling perspective |
| Rise (2,000–3,500), 3200 m  | 1.54E-02 | 3.42E-10 | 1.71E-08 | 2011 Quantitative analysis of anaerobic oxidation of methane (AOM) in marine sediments: A modeling perspective |
| Rise (2,000–3,500), 3200 m  | -        | 1.10E-09 | -        | 2011 Quantitative analysis of anaerobic oxidation of methane (AOM) in marine sediments: A modeling perspective |
| Rise (2,000–3,500), 2500 m  | -        | 5.22E-07 | -        | 2011 Quantitative analysis of anaerobic oxidation of methane (AOM) in marine sediments: A modeling perspective |
| Rise (2,000–3,500), 2770 m  | -        | 1.31E-06 | -        | 2011 Quantitative analysis of anaerobic oxidation of methane (AOM) in marine sediments: A modeling perspective |
| Rise (2,000–3,500), 4312 m  | -        | 5.07E-07 | -        | 2011 Quantitative analysis of anaerobic oxidation of methane (AOM) in marine sediments: A modeling perspective |
| Rise (2,000–3,500), 4000 m  | -        | 1.41E-04 | -        | 2011 Quantitative analysis of anaerobic oxidation of methane (AOM) in marine sediments: A modeling perspective |
| Rise (2,000–3,500),3200 m   | -        | 2.74E-05 | -        | 2006 Cretaceous black shales as active bioreactors=A biogeochemical                                            |
| Rise (2,000–3,500),3200 m   | -        | 5.48E-05 | -        | 2006 Cretaceous black shales as active bioreactors=A biogeochemical                                            |
| Rise (2,000–3,500),3200 m   | 6.15E-01 | 8.22E-05 | 1.03E-04 | 2006 Cretaceous black shales as active bioreactors=A biogeochemical                                            |
| Rise (2,000–3,500),3200 m   | 9.23E-01 | 1.10E-04 | 9.13E-05 | 2006 Cretaceous black shales as active bioreactors=A biogeochemical                                            |
| Rise (2,000–3,500),3200 m   | 1.15E+00 | 1.92E-04 | 1.28E-04 | 2006 Cretaceous black shales as active bioreactors=A biogeochemical                                            |
| Rise (2,000–3,500),3200 m   | 1.23E+00 | 1.64E-04 | 1.03E-04 | 2006 Cretaceous black shales as active bioreactors=A biogeochemical                                            |
| Rise (2,000–3,500),3200 m   | 1.54E+00 | 8.22E-05 | 4.11E-05 | 2006 Cretaceous black shales as active bioreactors=A biogeochemical                                            |
| Rise (2,000–3,500),3200 m   | -        | 4.11E-05 | -        | 2006 Cretaceous black shales as active bioreactors=A biogeochemical                                            |
| Rise (2,000–3,500),3200 m   | 3.85E-01 | 2.74E-06 | 5.48E-06 | 2006 Cretaceous black shales as active bioreactors=A biogeochemical                                            |
| Rise (2,000–3,500),3200 m   | -        | 1.37E-05 | -        | 2006 Cretaceous black shales as active bioreactors=A biogeochemical                                            |
| Rise (2,000–3,500),3200 m   | -        | 8.22E-06 | -        | 2006 Cretaceous black shales as active bioreactors=A biogeochemical                                            |
| Rise (2,000–3,500),3200 m   | 2.31E-01 | 3.29E-05 | 1.10E-04 | 2006 Cretaceous black shales as active bioreactors=A biogeochemical                                            |
| Rise (2,000–3,500),3200 m   | -        | 1.10E-05 | -        | 2006 Cretaceous black shales as active bioreactors=A biogeochemical                                            |
| Rise (2,000–3,500),3200 m   | -        | 5.48E-05 | -        | 2006 Cretaceous black shales as active bioreactors=A biogeochemical                                            |
| Rise (2,000–3,500),3200 m   | -        | 2.74E-05 | -        | 2006 Cretaceous black shales as active bioreactors=A biogeochemical                                            |

|                           |          |          |          |                                                                                              |
|---------------------------|----------|----------|----------|----------------------------------------------------------------------------------------------|
| Slope (200–2,000), 800 m  | -        | 6.85E-08 | 6.85E-07 | 2007 Rates of methanogenesis and methanotrophy in deep-sea sediment                          |
| Slope (200–2,000), 800 m  | 2.48E+00 | 5.48E-07 | 5.48E-06 | 2007 Rates of methanogenesis and methanotrophy in deep-sea sediment                          |
| Slope (200–2,000), 800 m  | 2.48E+00 | 8.22E-07 | 8.22E-06 | 2007 Rates of methanogenesis and methanotrophy in deep-sea sediment                          |
| Slope (200–2,000), 800 m  | 2.48E+00 | 1.10E-06 | 1.10E-05 | 2007 Rates of methanogenesis and methanotrophy in deep-sea sediment                          |
| Slope (200–2,000), 800 m  | 2.48E+00 | 1.64E-06 | 1.64E-05 | 2007 Rates of methanogenesis and methanotrophy in deep-sea sediment                          |
| Slope (200–2,000), 800 m  | 2.48E+00 | 1.92E-06 | 1.92E-05 | 2007 Rates of methanogenesis and methanotrophy in deep-sea sediment                          |
| inner shelf (10-50m) 45 m | 2.48E+00 | 1.50E-04 | 3.75E-03 | 2008 Thermodynamic and kinetic control on anaerobic oxidation of methane in marine sediments |
| inner shelf (10-50m) 45 m | 2.48E+00 | 3.00E-04 | 5.00E-03 | 2008 Thermodynamic and kinetic control on anaerobic oxidation of methane in marine sediments |
| inner shelf (10-50m) 45 m | 2.48E+00 | 2.50E-04 | 3.13E-03 | 2008 Thermodynamic and kinetic control on anaerobic oxidation of methane in marine sediments |
| inner shelf (10-50m) 45 m | 2.48E+00 | 1.50E-04 | 1.50E-03 | 2008 Thermodynamic and kinetic control on anaerobic oxidation of methane in marine sediments |
| inner shelf (10-50m) 45 m | 2.48E+00 | 4.00E-04 | 2.00E-03 | 2008 Thermodynamic and kinetic control on anaerobic oxidation of methane in marine sediments |
| inner shelf (10-50m) 45 m | 2.48E+00 | 2.00E-04 | 6.67E-04 | 2008 Thermodynamic and kinetic control on anaerobic oxidation of methane in marine sediments |
| inner shelf (10-50m) 45 m | 2.48E+00 | 1.20E-04 | 3.00E-04 | 2008 Thermodynamic and kinetic control on anaerobic oxidation of methane in marine sediments |
| inner shelf (10-50m) 45 m | 2.48E+00 | 2.50E-04 | 5.00E-04 | 2008 Thermodynamic and kinetic control on anaerobic oxidation of methane in marine sediments |
| inner shelf (10-50m) 45 m | 2.48E+00 | 6.00E-04 | 4.00E-04 | 2008 Thermodynamic and kinetic control on anaerobic oxidation of methane in marine sediments |
| inner shelf (10-50m) 45 m | 2.48E+00 | 1.20E-03 | 1.20E-03 | 2008 Thermodynamic and kinetic control on anaerobic oxidation of methane in marine sediments |
| inner shelf (10-50m) 45 m | 2.48E+00 | 1.35E-03 | 1.35E-03 | 2008 Thermodynamic and kinetic control on anaerobic oxidation of methane in marine sediments |
| inner shelf (10-50m) 45 m | 2.48E+00 | 1.80E-03 | 1.80E-03 | 2008 Thermodynamic and kinetic control on anaerobic oxidation of methane in marine sediments |
| inner shelf (10-50m) 45 m | 2.48E+00 | 2.10E-03 | 2.10E-03 | 2008 Thermodynamic and kinetic control on anaerobic oxidation of methane in marine sediments |
| inner shelf (10-50m) 45 m | 2.48E+00 | 1.00E-05 | 5.00E-06 | 2008 Thermodynamic and kinetic control on anaerobic oxidation of methane in marine sediments |
| Slope (200–2,000), 391 m  | -        | 1.00E-04 | -        | 2008 Thermodynamic and kinetic control on anaerobic oxidation of methane in marine sediments |
| Slope (200–2,000), 391 m  | -        | 2.00E-04 | -        | 2008 Thermodynamic and kinetic control on anaerobic oxidation of methane in marine sediments |
| Slope (200–2,000), 391 m  | -        | 1.50E-04 | -        | 2008 Thermodynamic and kinetic control on anaerobic oxidation of methane in marine sediments |
| Slope (200–2,000), 391 m  | -        | 2.30E-04 | -        | 2008 Thermodynamic and kinetic control on anaerobic oxidation of methane in marine           |

|                            |          |          |          |                                                                                                             |
|----------------------------|----------|----------|----------|-------------------------------------------------------------------------------------------------------------|
|                            |          |          |          | sediments                                                                                                   |
| Slope (200–2,000), 391 m   | -        | 3.00E-04 | -        | 2008 Thermodynamic and kinetic control on anaerobic oxidation of methane in marine sediments                |
| Slope (200–2,000), 391 m   | -        | 2.00E-04 | -        | 2008 Thermodynamic and kinetic control on anaerobic oxidation of methane in marine sediments                |
| Slope (200–2,000), 391 m   | -        | 5.00E-04 | -        | 2008 Thermodynamic and kinetic control on anaerobic oxidation of methane in marine sediments                |
| Slope (200–2,000), 391 m   | -        | 3.00E-03 | -        | 2008 Thermodynamic and kinetic control on anaerobic oxidation of methane in marine sediments                |
| Slope (200–2,000), 391 m   | -        | 4.00E-04 | -        | 2008 Thermodynamic and kinetic control on anaerobic oxidation of methane in marine sediments                |
| Outer shelf (50–200), 65 m | 3.85E-02 | 1.00E-04 | 2.00E-03 | 2000 Sulfate Reduction in Marine Sediments, Marine Geochemistry                                             |
| Outer shelf (50–200), 65 m | 9.62E-02 | 1.00E-03 | 8.00E-03 | 2000 Sulfate Reduction in Marine Sediments, Marine Geochemistry                                             |
| Outer shelf (50–200), 65 m | 1.92E-01 | 2.00E-03 | 8.00E-03 | 2000 Sulfate Reduction in Marine Sediments, Marine Geochemistry                                             |
| Outer shelf (50–200), 65 m | 3.46E-01 | 6.00E-03 | 1.33E-02 | 2000 Sulfate Reduction in Marine Sediments, Marine Geochemistry                                             |
| Outer shelf (50–200), 65 m | 4.62E-01 | 3.50E-03 | 5.83E-03 | 2000 Sulfate Reduction in Marine Sediments, Marine Geochemistry                                             |
| Outer shelf (50–200), 65 m | 6.15E-01 | 2.00E-03 | 2.50E-03 | 2000 Sulfate Reduction in Marine Sediments, Marine Geochemistry                                             |
| Outer shelf (50–200), 65 m | 8.46E-02 | 2.00E-03 | 1.82E-02 | 2000 Sulfate Reduction in Marine Sediments, Marine Geochemistry                                             |
| Outer shelf (50–200), 65 m | 1.54E-01 | 2.50E-03 | 1.25E-02 | 2000 Sulfate Reduction in Marine Sediments, Marine Geochemistry                                             |
| Outer shelf (50–200), 65 m | 2.31E-01 | 5.00E-03 | 1.67E-02 | 2000 Sulfate Reduction in Marine Sediments, Marine Geochemistry                                             |
| Outer shelf (50–200), 65 m | 3.08E-01 | 1.20E-02 | 3.00E-02 | 2000 Sulfate Reduction in Marine Sediments, Marine Geochemistry                                             |
| Outer shelf (50–200), 65 m | 5.00E-01 | 5.00E-03 | 7.69E-03 | 2000 Sulfate Reduction in Marine Sediments, Marine Geochemistry                                             |
| Outer shelf (50–200), 65 m | 6.69E-01 | 2.50E-03 | 2.87E-03 | 2000 Sulfate Reduction in Marine Sediments, Marine Geochemistry                                             |
| Outer shelf (50–200), 65 m | 8.46E-01 | 2.00E-04 | 1.82E-04 | 2000 Sulfate Reduction in Marine Sediments, Marine Geochemistry                                             |
| Slope (200–2,000),377 m    | -        | 1.00E-05 | -        | 2016 Anaerobic oxidation of methane alters sediment records of sulfur, iron and phosphorus in the Black Sea |
| Slope (200–2,000),377 m    | -        | 2.00E-05 | -        | 2016 Anaerobic oxidation of methane alters sediment records of sulfur, iron and phosphorus in the Black Sea |
| Slope (200–2,000),377 m    | -        | 3.00E-05 | -        | 2016 Anaerobic oxidation of methane alters sediment records of sulfur, iron and phosphorus in the Black Sea |
| Slope (200–2,000),377 m    | -        | 5.00E-05 | -        | 2016 Anaerobic oxidation of methane alters sediment records of sulfur, iron and phosphorus in the Black Sea |
| Slope (200–2,000),377 m    | -        | 6.00E-05 | -        | 2016 Anaerobic oxidation of methane alters sediment records of sulfur, iron and phosphorus in the Black Sea |
| Slope (200–2,000),377 m    | 3.85E-03 | 1.00E-04 | 2.00E-02 | 2016 Anaerobic oxidation of methane alters sediment records of sulfur, iron and phosphorus in the Black Sea |
| Slope (200–2,000),377 m    | 1.54E-02 | 1.50E-04 | 7.50E-03 | 2016 Anaerobic oxidation of methane alters sediment records of sulfur, iron and phosphorus in the Black Sea |
| Slope (200–2,000),377 m    | 6.15E-01 | 1.80E-04 | 2.25E-04 | 2016 Anaerobic oxidation of methane alters sediment records of sulfur,                                      |

|                          |          |          |          |                                                                                                                                            |
|--------------------------|----------|----------|----------|--------------------------------------------------------------------------------------------------------------------------------------------|
|                          |          |          |          | iron and phosphorus in the Black Sea                                                                                                       |
| Slope (200–2,000),377 m  | 1.00E+00 | 1.60E-04 | 1.23E-04 | 2016 Anaerobic oxidation of methane alters sediment records of sulfur, iron and phosphorus in the Black Sea                                |
| Slope (200–2,000),377 m  | 1.38E+00 | 9.00E-05 | 5.00E-05 | 2016 Anaerobic oxidation of methane alters sediment records of sulfur, iron and phosphorus in the Black Sea                                |
| Slope (200–2,000),377 m  | -        | 5.00E-05 | -        | 2016 Anaerobic oxidation of methane alters sediment records of sulfur, iron and phosphorus in the Black Sea                                |
| Slope (200–2,000),377 m  | -        | 3.00E-05 | -        | 2016 Anaerobic oxidation of methane alters sediment records of sulfur, iron and phosphorus in the Black Sea                                |
| Slope (200–2,000),377 m  | -        | 2.00E-05 | -        | 2016 Anaerobic oxidation of methane alters sediment records of sulfur, iron and phosphorus in the Black Sea                                |
| Slope (200–2,000),377 m  | -        | 5.00E-06 | -        | 2016 Anaerobic oxidation of methane alters sediment records of sulfur, iron and phosphorus in the Black Sea                                |
| Slope (200–2,000),1200 m | -        | 2.74E-07 | -        | 2013 Anaerobic methane oxidation in low-organic content methane seep sediments                                                             |
| Slope (200–2,000),1200 m | -        | 2.74E-06 | -        | 2013 Anaerobic methane oxidation in low-organic content methane seep sediments                                                             |
| Slope (200–2,000),1200 m | -        | 5.48E-06 | -        | 2013 Anaerobic methane oxidation in low-organic content methane seep sediments                                                             |
| Slope (200–2,000),1200 m | -        | 9.59E-06 | -        | 2013 Anaerobic methane oxidation in low-organic content methane seep sediments                                                             |
| Slope (200–2,000),1200 m | -        | 1.67E-05 | -        | 2013 Anaerobic methane oxidation in low-organic content methane seep sediments                                                             |
| Slope (200–2,000),1200 m | -        | 6.80E-04 | -        | 2013 Anaerobic methane oxidation in low-organic content methane seep sediments                                                             |
| Slope (200–2,000), 308m  | -        | 5.00E-05 | -        | 2007 Biogeochemistry and biodiversity of methane cycling in subsurface marine sediments                                                    |
| Slope (200–2,000), 308m  | -        | 5.00E-05 | -        | 2007 Biogeochemistry and biodiversity of methane cycling in subsurface marine sediments                                                    |
| Slope (200–2,000), 308m  | -        | 1.00E-04 | -        | 2007 Biogeochemistry and biodiversity of methane cycling in subsurface marine sediments                                                    |
| Slope (200–2,000), 308m  | -        | 1.00E-04 | -        | 2007 Biogeochemistry and biodiversity of methane cycling in subsurface marine sediments                                                    |
| Slope (200–2,000), 308m  | -        | 1.50E-04 | -        | 2007 Biogeochemistry and biodiversity of methane cycling in subsurface marine sediments                                                    |
| Slope (200–2,000), 308m  | -        | 2.00E-04 | -        | 2007 Biogeochemistry and biodiversity of methane cycling in subsurface marine sediments                                                    |
| Slope (200–2,000), 308m  | -        | 2.00E-04 | -        | 2007 Biogeochemistry and biodiversity of methane cycling in subsurface marine sediments                                                    |
| Slope (200–2,000), 308m  | -        | 3.00E-04 | -        | 2007 Biogeochemistry and biodiversity of methane cycling in subsurface marine sediments                                                    |
| Slope (200–2,000), 308m  | -        | 3.50E-04 | -        | 2007 Biogeochemistry and biodiversity of methane cycling in subsurface marine sediments                                                    |
| Slope (200–2,000), 308m  | -        | 6.00E-04 | -        | 2007 Biogeochemistry and biodiversity of methane cycling in subsurface marine sediments                                                    |
| Slope (200–2,000), 308m  | -        | 2.00E-03 | -        | 2007 Biogeochemistry and biodiversity of methane cycling in subsurface marine sediments                                                    |
| Slope (200–2,000), 308m  | -        | 3.10E-03 | -        | 2007 Biogeochemistry and biodiversity of methane cycling in subsurface marine sediments                                                    |
| Slope (200–2,000),850 m  | 8.46E-01 | 1.41E-01 | 1.28E-01 | 2021 Carbonate-hosted microbial communities are prolific and pervasive methane oxidizers at geologically diverse marine methane seep sites |
| Slope (200–2,000),850 m  | 8.46E-01 | 3.87E-02 | 3.52E-02 | 2021 Carbonate-hosted microbial communities are prolific and pervasive methane oxidizers at geologically diverse marine methane seep sites |
| Slope (200–2,000),850 m  | 8.46E-01 | 5.72E-01 | 5.20E-01 | 2021 Carbonate-hosted microbial communities are prolific and pervasive methane oxidizers at geologically diverse marine methane seep sites |
| Slope (200–2,000),850 m  | 8.46E-01 | 4.33E-03 | 3.94E-03 | 2021 Carbonate-hosted microbial communities                                                                                                |

|                               |          |          |          |                                                                                                                                            |
|-------------------------------|----------|----------|----------|--------------------------------------------------------------------------------------------------------------------------------------------|
|                               |          |          |          | are prolific and pervasive methane oxidizers at geologically diverse marine methane seep sites                                             |
| Slope (200–2,000),850 m       | 8.46E-01 | 8.42E-02 | 7.66E-02 | 2021 Carbonate-hosted microbial communities are prolific and pervasive methane oxidizers at geologically diverse marine methane seep sites |
| Slope (200–2,000),850 m       | 8.46E-01 | 1.17E-01 | 1.06E-01 | 2021 Carbonate-hosted microbial communities are prolific and pervasive methane oxidizers at geologically diverse marine methane seep sites |
| Slope (200–2,000),1300 m      | 8.46E-01 | 1.91E-01 | 1.74E-01 | 2021 Carbonate-hosted microbial communities are prolific and pervasive methane oxidizers at geologically diverse marine methane seep sites |
| Slope (200–2,000),1300 m      | 8.46E-01 | 1.49E-01 | 1.35E-01 | 2021 Carbonate-hosted microbial communities are prolific and pervasive methane oxidizers at geologically diverse marine methane seep sites |
| Slope (200–2,000),1300 m      | 8.46E-01 | 1.91E-01 | 1.74E-01 | 2021 Carbonate-hosted microbial communities are prolific and pervasive methane oxidizers at geologically diverse marine methane seep sites |
| Slope (200–2,000),1300 m      | 8.46E-01 | 1.89E-01 | 1.72E-01 | 2021 Carbonate-hosted microbial communities are prolific and pervasive methane oxidizers at geologically diverse marine methane seep sites |
| Slope (200–2,000),1000-2000 m | 8.46E-01 | 2.00E-02 | 1.82E-02 | 2021 Carbonate-hosted microbial communities are prolific and pervasive methane oxidizers at geologically diverse marine methane seep sites |
| Slope (200–2,000),1000-2000 m | 8.46E-01 | 1.20E-02 | 1.09E-02 | 2021 Carbonate-hosted microbial communities are prolific and pervasive methane oxidizers at geologically diverse marine methane seep sites |
| Slope (200–2,000),1000-2000 m | 8.46E-01 | 3.80E-02 | 3.45E-02 | 2021 Carbonate-hosted microbial communities are prolific and pervasive methane oxidizers at geologically diverse marine methane seep sites |
| Slope (200–2,000),1000-2000 m | 8.46E-01 | 5.82E-03 | 5.29E-03 | 2021 Carbonate-hosted microbial communities are prolific and pervasive methane oxidizers at geologically diverse marine methane seep sites |
| Slope (200–2,000),1000-2000 m | 8.46E-01 | 5.82E-01 | 5.29E-01 | 2021 Carbonate-hosted microbial communities are prolific and pervasive methane oxidizers at geologically diverse marine methane seep sites |
| Slope (200–2,000),745 m       | 8.46E-01 | 1.09E-01 | 9.91E-02 | 2021 Carbonate-hosted microbial communities are prolific and pervasive methane oxidizers at geologically diverse marine methane seep sites |
| Slope (200–2,000),745 m       | 8.46E-01 | 2.01E-01 | 1.83E-01 | 2021 Carbonate-hosted microbial communities are prolific and pervasive methane oxidizers at geologically diverse marine methane seep sites |
| Slope (200–2,000),745 m       | 8.46E-01 | 5.42E+00 | 4.93E+00 | 2021 Carbonate-hosted microbial communities are prolific and pervasive methane oxidizers at geologically diverse marine methane seep sites |
| Slope (200–2,000),745 m       | 8.46E-01 | 4.36E+00 | 3.96E+00 | 2021 Carbonate-hosted microbial communities are prolific and pervasive methane oxidizers at geologically diverse marine methane seep sites |
| Slope (200–2,000),745 m       | 8.46E-01 | 8.33E-01 | 7.57E-01 | 2021 Carbonate-hosted microbial communities are prolific and pervasive methane oxidizers at geologically diverse marine methane seep sites |
| Slope (200–2,000),700 m       | 7.69E-01 | 1.13E+00 | -        | 2005 Microbial methane turnover in different marine habitats                                                                               |
| Slope (200–2,000),700 m       | 7.69E-01 | 3.14E+00 | -        | 2005 Microbial methane turnover in different marine habitats                                                                               |
| Slope (200–2,000),700 m       | 7.69E-01 | 6.54E+00 | -        | 2005 Microbial methane turnover in different marine habitats                                                                               |
| Slope (200–2,000),597 m       | 4.85E-02 | 1.60E-03 | 2.54E-02 | 2016 Sediment geochemistry and alkane oxidation rates from sediments collected November 2010 and experimental incubations                  |
| Slope (200–2,000),597 m       | 2.91E-01 | 6.80E-03 | 1.80E-02 | 2016 Sediment geochemistry and alkane oxidation rates from sediments collected November 2010 and experimental incubations                  |
| Slope (200–2,000),597 m       | 2.86E-01 | 5.00E-03 | 1.34E-02 | 2016 Sediment geochemistry and alkane oxidation rates from sediments collected November 2010 and experimental incubations                  |

|                           |          |          |          |                                                                                                                                                            |
|---------------------------|----------|----------|----------|------------------------------------------------------------------------------------------------------------------------------------------------------------|
| Slope (200–2,000),597 m   | 1.54E-01 | 7.80E-03 | 3.90E-02 | 2016 Sediment geochemistry and alkane oxidation rates from sediments collected November 2010 and experimental incubations                                  |
| Slope (200–2,000),597 m   | 2.75E-01 | 1.82E-02 | 5.09E-02 | 2016 Sediment geochemistry and alkane oxidation rates from sediments collected November 2010 and experimental incubations                                  |
| Slope (200–2,000),597 m   | 2.22E-01 | 1.89E-02 | 6.54E-02 | 2016 Sediment geochemistry and alkane oxidation rates from sediments collected November 2010 and experimental incubations                                  |
| Rise (2,000–3,500),2428 m | 2.15E+00 | 8.00E-02 | -        | 2012 Anaerobic methane oxidation in metalliferous hydrothermal sediments: influence on carbon flux and decoupling from sulfate reduction                   |
| Rise (2,000–3,500),2428 m | 2.15E+00 | 5.00E-02 | -        | 2012 Anaerobic methane oxidation in metalliferous hydrothermal sediments: influence on carbon flux and decoupling from sulfate reduction                   |
| Rise (2,000–3,500),2428 m | 2.15E+00 | 1.00E-01 | -        | 2012 Anaerobic methane oxidation in metalliferous hydrothermal sediments: influence on carbon flux and decoupling from sulfate reduction                   |
| inner shelf (10-50m)28 m  | 1.15E+01 | 5.65E+00 | -        | 2005 Microbial methane turnover in different marine habitats                                                                                               |
| Slope (200–2,000), 700m   | 1.15E+01 | 1.02E+01 | -        | 2005 Microbial methane turnover in different marine habitats                                                                                               |
| Slope (200–2,000), 650m   | 1.15E+01 | 1.69E+01 | -        | 2005 Microbial methane turnover in different marine habitats                                                                                               |
| Slope (200–2,000),880 m   | 1.42E+00 | 1.44E-02 | 7.78E-03 | 2019 Sediment geochemistry and process rate measurements aboard the R/V Endeavor cruise EN586 in the northern Gulf of Mexico from 2016-07-26 to 2016-08-76 |
| Slope (200–2,000),880 m   | 2.07E+00 | 1.42E-01 | 5.26E-02 | 2019 Sediment geochemistry and process rate measurements aboard the R/V Endeavor cruise EN586 in the northern Gulf of Mexico from 2016-07-26 to 2016-08-77 |
| Slope (200–2,000),880 m   | 1.78E+00 | 3.99E-03 | 1.72E-03 | 2019 Sediment geochemistry and process rate measurements aboard the R/V Endeavor cruise EN586 in the northern Gulf of Mexico from 2016-07-26 to 2016-08-78 |
| Slope (200–2,000), 1046 m | 1.39E+00 | 7.45E-03 | 4.14E-03 | R/V Endeavor: EN528 Water and Sediment Chemistry, Gulf of Mexico, July 7-22, 2022                                                                          |
| Slope (200–2,000), 1046 m | 1.10E+00 | 4.74E-04 | 3.32E-04 | R/V Endeavor: EN528 Water and Sediment Chemistry, Gulf of Mexico, July 7-22, 2023                                                                          |
| Slope (200–2,000), 1046 m | 1.71E+00 | 1.08E-03 | 4.84E-04 | R/V Endeavor: EN528 Water and Sediment Chemistry, Gulf of Mexico, July 7-22, 2024                                                                          |
| Slope (200–2,000), 1046 m | 1.27E+00 | 2.23E-03 | 1.35E-03 | R/V Endeavor: EN528 Water and Sediment Chemistry, Gulf of Mexico, July 7-22, 2025                                                                          |
| Slope (200–2,000),520m    | 2.50E+00 | 1.42E-01 | -        | 2009 Manganese- and Iron-Dependent Marine Methane Oxidation                                                                                                |
| inner shelf (10-50m) 45 m | 1.08E+00 | 6.51E-02 | 4.65E-02 | 2019 Pressure Selects Dominant Anaerobic Methanotrophic Phylotype and Sulfate Reducing Bacteria in Coastal Marine Lake Grevelingen                         |
| inner shelf (10-50m) 45 m | 4.92E+00 | 1.13E-01 | 1.77E-02 | 2019 Pressure Selects Dominant Anaerobic Methanotrophic Phylotype and Sulfate Reducing Bacteria in Coastal Marine Lake Grevelingen                         |
| inner shelf (10-50m) 45 m | 7.84E+01 | 3.83E-02 | 3.76E-04 | 2019 Pressure Selects Dominant Anaerobic Methanotrophic Phylotype and Sulfate Reducing Bacteria in Coastal Marine Lake Grevelingen                         |
| inner shelf (10-50m) 45 m | 1.15E+02 | 3.21E-02 | 2.14E-04 | 2019 Pressure Selects Dominant Anaerobic Methanotrophic Phylotype and Sulfate Reducing Bacteria in Coastal Marine Lake Grevelingen                         |
| inner shelf (10-50m) 45 m | 1.52E+02 | 1.35E-02 | 6.82E-05 | 2019 Pressure Selects Dominant Anaerobic Methanotrophic Phylotype and Sulfate Reducing Bacteria in Coastal Marine Lake Grevelingen                         |
| Rise (2,000–3,500), 2330  | 1.38E+01 | 1.80E-03 | 1.00E-04 | 2010 New constraints on methane fluxes and                                                                                                                 |

|                               |          |          |          |                                                                                                                                              |
|-------------------------------|----------|----------|----------|----------------------------------------------------------------------------------------------------------------------------------------------|
| m                             |          |          |          | rates of anaerobic methane oxidation in a Gulf of Mexico brine pool via in situ mass spectrometry                                            |
| Rise (2,000–3,500), 2330 m    | 2.69E+01 | 3.50E-03 | 1.00E-04 | 2010 New constraints on methane fluxes and rates of anaerobic methane oxidation in a Gulf of Mexico brine pool via in situ mass spectrometry |
| Slope (200–2,000),1000-2000 m | 3.85E+01 | 4.80E+00 | 9.60E-02 | 2019 Remarkable Capacity for Anaerobic Oxidation of Methane at High Methane Concentration                                                    |
| Slope (200–2,000),1000-2000 m | 7.69E+00 | 3.60E+00 | 3.60E-01 | 2019 Remarkable Capacity for Anaerobic Oxidation of Methane at High Methane Concentration                                                    |
| Slope (200–2,000),1000-2000 m | 3.85E+00 | 2.80E-01 | 5.60E-02 | 2019 Remarkable Capacity for Anaerobic Oxidation of Methane at High Methane Concentration                                                    |
| inner shelf (10-50m)28 m      | 1.15E+01 | 4.50E-01 | 3.00E-02 | 2005 Microbial methane turnover in different marine habitats                                                                                 |
| Slope (200–2,000),700-1250 m  | 1.15E+01 | 3.70E-01 | 2.47E-02 | 2005 Microbial methane turnover in different marine habitats                                                                                 |
| Slope (200–2,000),700-1250 m  | 1.15E+01 | 2.40E-01 | 1.60E-02 | 2005 Microbial methane turnover in different marine habitats                                                                                 |
| Slope (200–2,000),1200 m      | 9.87E+01 | 2.60E-01 | 3.21E-02 | 2018 Effect of pressure and temperature on anaerobic methanotrophic activities of a highly enriched ANME-2a community                        |
| Slope (200–2,000),1200 m      | 9.87E+01 | 6.80E-01 | 7.56E-02 | 2018 Effect of pressure and temperature on anaerobic methanotrophic activities of a highly enriched ANME-2a community                        |
| Slope (200–2,000),1200 m      | 2.96E+02 | 1.50E+00 | 1.15E-01 | 2018 Effect of pressure and temperature on anaerobic methanotrophic activities of a highly enriched ANME-2a community                        |
| Slope (200–2,000),1500-2000 m | 2.48E+00 | 1.20E+00 | 8.57E-01 | 2011 Thermophilic anaerobic oxidation of methane by marine microbial consortia                                                               |
| Slope (200–2,000),850 m       | 3.50E+00 | 1.00E+00 | -        | 2016 Artificial electron acceptors decouple archaeal methane oxidation from sulfate reduction                                                |
| Slope (200–2,000), 910 m      | 1.50E+00 | 6.20E-03 | -        | 2014 Stratified Community Responses to Methane and Sulfate Supplies in Mud Volcano Deposits: Insights from an In Vitro Experiment.           |
| inner shelf (10-50m) 45 m     | 2.00E+00 | 5.00E-02 | -        | 2017 Anaerobic Methane-Oxidizing Microbial Community in a Coastal Marine Sediment: Anaerobic Methanotrophy Dominated by ANME-3               |
| inner shelf (10-50m) 45 m     | 2.00E+00 | 1.70E-01 | -        | 2017 Anaerobic Methane-Oxidizing Microbial Community in a Coastal Marine Sediment: Anaerobic Methanotrophy Dominated by ANME-3               |
| Slope (200–2,000),520m        | 2.50E+00 | 1.64E-02 | -        | 2009 Manganese- and Iron-Dependent Marine Methane Oxidation                                                                                  |
| inner shelf (10-50m)          | 1.00E+02 | 4.60E-02 | -        | 2015 Growth of Anaerobic Methane-Oxidizing Archaea and Sulfate-Reducing Bacteria in a High-Pressure Membrane                                 |
| Slope (200–2,000),597 m       | 9.41E-02 | 8.00E-04 | 6.54E-03 | 2016 Sediment geochemistry and alkane oxidation rates from sediments collected November 2010 and experimental incubations                    |
| Slope (200–2,000),850 m       | 7.58E+01 | 1.13E+01 | 1.03E+01 | 2021 Carbonate-hosted microbial communities are prolific and pervasive methane oxidizers at geologically diverse marine methane seep sites   |
| Slope (200–2,000),1300 m      | 7.58E+01 | 1.02E+01 | 9.32E+00 | 2021 Carbonate-hosted microbial communities are prolific and pervasive methane oxidizers at geologically diverse marine methane seep sites   |
| Slope (200–2,000),1000-2000 m | 7.58E+01 | 7.44E+00 | 6.76E+00 | 2021 Carbonate-hosted microbial communities are prolific and pervasive methane oxidizers at geologically diverse marine methane seep sites   |
| Slope (200–2,000),1000-2000 m | 7.58E+01 | 2.35E+00 | 2.14E+00 | 2021 Carbonate-hosted microbial communities are prolific and pervasive methane oxidizers at geologically diverse marine methane seep sites   |

|                         |          |          |          |                                                                                                                                            |
|-------------------------|----------|----------|----------|--------------------------------------------------------------------------------------------------------------------------------------------|
| Slope (200–2,000),745 m | 7.58E+01 | 2.80E+01 | 2.54E+01 | 2021 Carbonate-hosted microbial communities are prolific and pervasive methane oxidizers at geologically diverse marine methane seep sites |
| Slope (200–2,000),745 m | 7.58E+01 | 1.15E+01 | 1.04E+01 | 2021 Carbonate-hosted microbial communities are prolific and pervasive methane oxidizers at geologically diverse marine methane seep sites |

**Table S7.** The rates of aerobic methane oxidation in marine environment.

| Marine, Aerobic       |                                             |                      |                                                                                                                                                |
|-----------------------|---------------------------------------------|----------------------|------------------------------------------------------------------------------------------------------------------------------------------------|
| CH <sub>4</sub> (atm) | Rates (μmol/g/d or μmol/cm <sup>3</sup> /d) | K (d <sup>-1</sup> ) | Reference                                                                                                                                      |
| 2.25E-07              | 9.00E-09                                    | 3.00E-02             | 2020 Methane Seeps and Independent Methane Plumes in the South China Sea Offshore Taiwan                                                       |
| 5.90E-07              | 4.25E-09                                    | 5.40E-03             | 2019 Water column chemistry data collected on board the R/V Endeavor cruise EN586 in the northern Gulf of Mexico from 2016-07-24 to 2016-08-14 |
| 1.41E-06              | 2.28E-09                                    | 1.21E-03             | 2017 R/V Endeavor: EN559 Water Column Chemistry and microbial process rate measurements, Gulf of Mexico, May 29 - June 20, 2015                |
| 1.80E-06              | 3.60E-09                                    | 1.50E-03             | 2003 Methane Oxidation Potential in the Water Column of Two Diverse Coastal Marine Sites                                                       |
| 1.80E-06              | 3.60E-09                                    | 1.50E-03             | 2010 Distributions of putative aerobic methanotrophs in diverse pelagic marine environments                                                    |
| 1.91E-06              | 3.51E-09                                    | 1.38E-03             | 2017 R/V Endeavor: EN559 Water Column Chemistry and microbial process rate measurements, Gulf of Mexico, May 29 - June 20, 2015                |
| 2.04E-06              | 2.85E-09                                    | 1.04E-03             | 2017 R/V Endeavor: EN559 Water Column Chemistry and microbial process rate measurements, Gulf of Mexico, May 29 - June 20, 2015                |
| 2.48E-06              | 3.23E-09                                    | 9.77E-04             | 2017 R/V Endeavor: EN559 Water Column Chemistry and microbial process rate measurements, Gulf of Mexico, May 29 - June 20, 2015                |
| 2.62E-06              | 2.80E-09                                    | 8.00E-04             | 2010 Distributions of putative aerobic methanotrophs in diverse pelagic marine environments                                                    |
| 2.97E-06              | 2.97E-08                                    | 7.50E-03             | 2019 Water column chemistry data collected on board the R/V Endeavor cruise EN586 in the northern Gulf of Mexico from 2016-07-24 to 2016-08-14 |
| 3.08E-06              | 2.13E-08                                    | 5.20E-03             | 2019 Water column chemistry data collected on board the R/V Endeavor cruise EN586 in the northern Gulf of Mexico from 2016-07-24 to 2016-08-14 |
| 3.16E-06              | 2.34E-08                                    | 5.56E-03             | 2019 Water column chemistry data collected on board the R/V Endeavor cruise EN586 in the northern Gulf of Mexico from 2016-07-24 to 2016-08-14 |
| 3.29E-06              | 4.60E-08                                    | 1.05E-02             | 2019 Water column chemistry data collected on board the R/V Endeavor cruise EN586 in the northern Gulf of Mexico from 2016-07-24 to 2016-08-14 |
| 3.31E-06              | 2.06E-08                                    | 4.65E-03             | 2019 Water column chemistry data collected on board the R/V Endeavor cruise EN586 in the northern Gulf of Mexico from 2016-07-24 to 2016-08-14 |
| 3.34E-06              | 1.30E-09                                    | 2.91E-04             | 2019 Water column chemistry data collected on board the R/V Endeavor cruise EN586 in the northern Gulf of Mexico from 2016-07-24 to 2016-08-14 |
| 3.36E-06              | 2.26E-10                                    | 5.03E-05             | 2019 Water column chemistry data collected on board the R/V Endeavor cruise EN586 in the northern Gulf of Mexico from 2016-07-24 to 2016-08-14 |
| 3.46E-06              | 2.27E-09                                    | 4.91E-04             | 2019 Water column chemistry data collected on board the R/V Endeavor cruise EN586 in the northern Gulf of Mexico from 2016-07-24 to 2016-08-14 |
| 3.48E-06              | 4.03E-09                                    | 8.68E-04             | 2019 Water column chemistry data collected on board the R/V Endeavor cruise EN586 in the northern Gulf of Mexico from 2016-07-24 to 2016-08-14 |
| 3.49E-06              | 7.07E-09                                    | 1.52E-03             | 2019 Water column chemistry data collected on board the R/V Endeavor cruise EN586 in the northern Gulf of Mexico from 2016-07-24 to 2016-08-14 |
| 3.49E-06              | 3.07E-08                                    | 6.60E-03             | 2019 Water column chemistry data collected on board the R/V Endeavor cruise EN586 in the northern Gulf of Mexico from 2016-07-24 to 2016-08-14 |
| 3.49E-06              | 1.53E-10                                    | 3.28E-05             | 2017 R/V Endeavor: EN559 Water Column Chemistry and microbial process rate measurements, Gulf of Mexico, May 29 - June 20, 2015                |
| 3.51E-06              | 8.39E-08                                    | 1.79E-02             | 2019 Water column chemistry data collected on board the R/V Endeavor cruise EN586 in the northern Gulf of Mexico from 2016-07-24 to 2016-08-14 |
| 3.53E-06              | 1.39E-07                                    | 2.94E-02             | 2019 Water column chemistry data collected on board the R/V Endeavor cruise EN586 in the northern Gulf of Mexico from 2016-07-24 to 2016-08-14 |
| 3.56E-06              | 8.41E-09                                    | 1.77E-03             | 2019 Water column chemistry data collected on board the R/V Endeavor cruise EN586 in the northern Gulf of Mexico from 2016-07-24 to 2016-08-14 |
| 3.57E-06              | 1.08E-07                                    | 2.27E-02             | 2019 Water column chemistry data collected on board the R/V Endeavor cruise EN586 in the northern Gulf of Mexico from 2016-07-24 to 2016-08-14 |

|          |          |          |                                                                                                                                                |
|----------|----------|----------|------------------------------------------------------------------------------------------------------------------------------------------------|
| 3.61E-06 | 2.54E-09 | 5.26E-04 | 2019 Water column chemistry data collected on board the R/V Endeavor cruise EN586 in the northern Gulf of Mexico from 2016-07-24 to 2016-08-14 |
| 3.64E-06 | 1.10E-07 | 2.26E-02 | 2019 Water column chemistry data collected on board the R/V Endeavor cruise EN586 in the northern Gulf of Mexico from 2016-07-24 to 2016-08-14 |
| 3.68E-06 | 3.42E-08 | 6.95E-03 | 2019 Water column chemistry data collected on board the R/V Endeavor cruise EN586 in the northern Gulf of Mexico from 2016-07-24 to 2016-08-14 |
| 3.70E-06 | 3.40E-08 | 6.89E-03 | 2019 Water column chemistry data collected on board the R/V Endeavor cruise EN586 in the northern Gulf of Mexico from 2016-07-24 to 2016-08-14 |
| 3.75E-06 | 1.50E-10 | 3.00E-05 | 2010 Methane Oxidation in the Eastern Tropical North Pacific                                                                                   |
| 3.75E-06 | 2.00E-10 | 4.00E-05 | 2010 Methane Oxidation in the Eastern Tropical North Pacific                                                                                   |
| 3.76E-06 | 8.55E-08 | 1.71E-02 | 2019 Water column chemistry data collected on board the R/V Endeavor cruise EN586 in the northern Gulf of Mexico from 2016-07-24 to 2016-08-14 |
| 3.76E-06 | 1.81E-07 | 3.60E-02 | 2019 Water column chemistry data collected on board the R/V Endeavor cruise EN586 in the northern Gulf of Mexico from 2016-07-24 to 2016-08-14 |
| 3.77E-06 | 1.88E-10 | 3.73E-05 | 2017 R/V Endeavor: EN559 Water Column Chemistry and microbial process rate measurements, Gulf of Mexico, May 29 - June 20, 2015                |
| 3.79E-06 | 1.38E-07 | 2.72E-02 | 2019 Water column chemistry data collected on board the R/V Endeavor cruise EN586 in the northern Gulf of Mexico from 2016-07-24 to 2016-08-14 |
| 3.87E-06 | 9.77E-08 | 1.89E-02 | 2019 Water column chemistry data collected on board the R/V Endeavor cruise EN586 in the northern Gulf of Mexico from 2016-07-24 to 2016-08-14 |
| 3.87E-06 | 8.95E-08 | 1.73E-02 | 2019 Water column chemistry data collected on board the R/V Endeavor cruise EN586 in the northern Gulf of Mexico from 2016-07-24 to 2016-08-14 |
| 3.92E-06 | 3.47E-08 | 6.64E-03 | 2019 Water column chemistry data collected on board the R/V Endeavor cruise EN586 in the northern Gulf of Mexico from 2016-07-24 to 2016-08-14 |
| 3.95E-06 | 7.26E-08 | 1.38E-02 | 2019 Water column chemistry data collected on board the R/V Endeavor cruise EN586 in the northern Gulf of Mexico from 2016-07-24 to 2016-08-14 |
| 3.96E-06 | 2.06E-09 | 3.90E-04 | 2017 R/V Endeavor: EN559 Water Column Chemistry and microbial process rate measurements, Gulf of Mexico, May 29 - June 20, 2015                |
| 3.97E-06 | 6.86E-08 | 1.29E-02 | 2019 Water column chemistry data collected on board the R/V Endeavor cruise EN586 in the northern Gulf of Mexico from 2016-07-24 to 2016-08-14 |
| 4.00E-06 | 2.51E-07 | 4.71E-02 | 2019 Water column chemistry data collected on board the R/V Endeavor cruise EN586 in the northern Gulf of Mexico from 2016-07-24 to 2016-08-14 |
| 4.02E-06 | 8.35E-08 | 1.56E-02 | 2019 Water column chemistry data collected on board the R/V Endeavor cruise EN586 in the northern Gulf of Mexico from 2016-07-24 to 2016-08-14 |
| 4.03E-06 | 3.09E-10 | 5.75E-05 | 2019 Water column chemistry data collected on board the R/V Endeavor cruise EN586 in the northern Gulf of Mexico from 2016-07-24 to 2016-08-14 |
| 4.04E-06 | 3.66E-10 | 6.79E-05 | 2019 Water column chemistry data collected on board the R/V Endeavor cruise EN586 in the northern Gulf of Mexico from 2016-07-24 to 2016-08-14 |
| 4.09E-06 | 1.29E-09 | 2.37E-04 | 2019 Water column chemistry data collected on board the R/V Endeavor cruise EN586 in the northern Gulf of Mexico from 2016-07-24 to 2016-08-14 |
| 4.09E-06 | 1.23E-07 | 2.25E-02 | 2019 Water column chemistry data collected on board the R/V Endeavor cruise EN586 in the northern Gulf of Mexico from 2016-07-24 to 2016-08-14 |
| 4.12E-06 | 1.00E-08 | 1.82E-03 | 2010 Distributions of putative aerobic methanotrophs in diverse pelagic marine environments                                                    |
| 4.19E-06 | 1.24E-07 | 2.21E-02 | 2019 Water column chemistry data collected on board the R/V Endeavor cruise EN586 in the northern Gulf of Mexico from 2016-07-24 to 2016-08-14 |
| 4.25E-06 | 1.36E-07 | 2.39E-02 | 2019 Water column chemistry data collected on board the R/V Endeavor cruise EN586 in the northern Gulf of Mexico from 2016-07-24 to 2016-08-14 |
| 4.28E-06 | 9.54E-11 | 1.67E-05 | 2019 Water column chemistry data collected on board the R/V Endeavor cruise EN586 in the northern Gulf of Mexico from 2016-07-24 to 2016-08-14 |
| 4.28E-06 | 9.09E-08 | 1.59E-02 | 2019 Water column chemistry data collected on board the R/V Endeavor cruise EN586 in the northern Gulf of Mexico from 2016-07-24 to 2016-08-14 |
| 4.33E-06 | 5.51E-08 | 9.53E-03 | 2019 Water column chemistry data collected on board the R/V Endeavor cruise EN586 in the northern Gulf of Mexico from 2016-07-24 to 2016-08-14 |
| 4.38E-06 | 7.45E-07 | 1.27E-01 | 2019 Water column chemistry data collected on board the R/V Endeavor cruise EN586 in the northern Gulf of Mexico from 2016-07-24 to 2016-08-14 |
| 4.44E-06 | 5.96E-08 | 1.01E-02 | 2019 Water column chemistry data collected on board the R/V Endeavor cruise EN586 in the northern Gulf of Mexico from 2016-07-24 to 2016-08-14 |
| 4.49E-06 | 2.94E-10 | 4.91E-05 | 2017 R/V Endeavor: EN559 Water Column Chemistry and microbial process rate measurements, Gulf of Mexico, May 29 - June 20, 2015                |
| 4.49E-06 | 3.00E-10 | 5.00E-05 | 2010 Methane Oxidation in the Eastern Tropical North Pacific                                                                                   |
| 4.50E-06 | 5.59E-07 | 9.30E-02 | 2016 R/V Endeavor: EN528 Water and Sediment Chemistry, Gulf of Mexico, July 7-22, 2013                                                         |
| 4.65E-06 | 5.16E-07 | 8.30E-02 | 2019 Water column chemistry data collected on board the R/V Endeavor cruise                                                                    |

|          |          |          |                                                                                                                                                                 |
|----------|----------|----------|-----------------------------------------------------------------------------------------------------------------------------------------------------------------|
|          |          |          | EN586 in the northern Gulf of Mexico from 2016-07-24 to 2016-08-14                                                                                              |
| 4.66E-06 | 9.27E-10 | 1.49E-04 | 2019 Methane concentration and oxidation rates in water column data collected aboard the R/V Sikuliaq in the northern Chukchi Sea from 2017-08-11 to 2017-08-20 |
| 4.67E-06 | 7.88E-07 | 1.27E-01 | 2019 Water column chemistry data collected on board the R/V Endeavor cruise EN586 in the northern Gulf of Mexico from 2016-07-24 to 2016-08-14                  |
| 4.69E-06 | 4.97E-09 | 7.92E-04 | 2019 Water column chemistry data collected on board the R/V Endeavor cruise EN586 in the northern Gulf of Mexico from 2016-07-24 to 2016-08-14                  |
| 4.80E-06 | 3.69E-09 | 5.76E-04 | 2017 R/V Endeavor: EN559 Water Column Chemistry and microbial process rate measurements, Gulf of Mexico, May 29 - June 20, 2015                                 |
| 4.87E-06 | 4.77E-08 | 7.33E-03 | 2019 Water column chemistry data collected on board the R/V Endeavor cruise EN586 in the northern Gulf of Mexico from 2016-07-24 to 2016-08-14                  |
| 4.95E-06 | 2.24E-07 | 3.39E-02 | 2019 Water column chemistry data collected on board the R/V Endeavor cruise EN586 in the northern Gulf of Mexico from 2016-07-24 to 2016-08-14                  |
| 5.09E-06 | 2.61E-07 | 3.84E-02 | 2019 Water column chemistry data collected on board the R/V Endeavor cruise EN586 in the northern Gulf of Mexico from 2016-07-24 to 2016-08-14                  |
| 5.18E-06 | 1.88E-09 | 2.72E-04 | 2017 R/V Endeavor: EN559 Water Column Chemistry and microbial process rate measurements, Gulf of Mexico, May 29 - June 20, 2015                                 |
| 5.24E-06 | 1.00E-09 | 1.43E-04 | 2010 Methane Oxidation in the Eastern Tropical North Pacific                                                                                                    |
| 5.35E-06 | 6.91E-10 | 9.67E-05 | 2017 R/V Endeavor: EN559 Water Column Chemistry and microbial process rate measurements, Gulf of Mexico, May 29 - June 20, 2015                                 |
| 5.48E-06 | 1.67E-10 | 2.29E-05 | 2017 R/V Endeavor: EN559 Water Column Chemistry and microbial process rate measurements, Gulf of Mexico, May 29 - June 20, 2015                                 |
| 5.54E-06 | 2.09E-07 | 2.83E-02 | 2019 Water column chemistry data collected on board the R/V Endeavor cruise EN586 in the northern Gulf of Mexico from 2016-07-24 to 2016-08-14                  |
| 5.62E-06 | 1.50E-09 | 2.00E-04 | 2010 Methane Oxidation in the Eastern Tropical North Pacific                                                                                                    |
| 5.93E-06 | 4.06E-09 | 5.13E-04 | 2019 Water column chemistry data collected on board the R/V Endeavor cruise EN586 in the northern Gulf of Mexico from 2016-07-24 to 2016-08-14                  |
| 5.94E-06 | 4.89E-09 | 6.17E-04 | 2017 R/V Endeavor: EN559 Water Column Chemistry and microbial process rate measurements, Gulf of Mexico, May 29 - June 20, 2015                                 |
| 5.94E-06 | 1.00E-08 | 1.27E-03 | 2017 R/V Endeavor: EN559 Water Column Chemistry and microbial process rate measurements, Gulf of Mexico, May 29 - June 20, 2015                                 |
| 5.98E-06 | 2.08E-09 | 2.60E-04 | 2017 R/V Endeavor: EN559 Water Column Chemistry and microbial process rate measurements, Gulf of Mexico, May 29 - June 20, 2015                                 |
| 5.98E-06 | 5.56E-09 | 6.97E-04 | 2017 R/V Endeavor: EN559 Water Column Chemistry and microbial process rate measurements, Gulf of Mexico, May 29 - June 20, 2015                                 |
| 5.99E-06 | 6.00E-10 | 7.50E-05 | 2010 Methane Oxidation in the Eastern Tropical North Pacific                                                                                                    |
| 6.16E-06 | 2.86E-08 | 3.48E-03 | 2019 Water column chemistry data collected on board the R/V Endeavor cruise EN586 in the northern Gulf of Mexico from 2016-07-24 to 2016-08-14                  |
| 6.17E-06 | 3.66E-09 | 4.44E-04 | 2017 R/V Endeavor: EN559 Water Column Chemistry and microbial process rate measurements, Gulf of Mexico, May 29 - June 20, 2015                                 |
| 6.30E-06 | 8.60E-11 | 1.02E-05 | 2017 R/V Endeavor: EN559 Water Column Chemistry and microbial process rate measurements, Gulf of Mexico, May 29 - June 20, 2015                                 |
| 6.31E-06 | 6.33E-10 | 7.51E-05 | 2019 Water column chemistry data collected on board the R/V Endeavor cruise EN586 in the northern Gulf of Mexico from 2016-07-24 to 2016-08-14                  |
| 6.33E-06 | 2.32E-10 | 2.75E-05 | 2017 R/V Endeavor: EN559 Water Column Chemistry and microbial process rate measurements, Gulf of Mexico, May 29 - June 20, 2015                                 |
| 6.40E-06 | 1.70E-08 | 1.99E-03 | 2017 R/V Endeavor: EN559 Water Column Chemistry and microbial process rate measurements, Gulf of Mexico, May 29 - June 20, 2015                                 |
| 6.51E-06 | 1.52E-10 | 1.75E-05 | 2017 R/V Endeavor: EN559 Water Column Chemistry and microbial process rate measurements, Gulf of Mexico, May 29 - June 20, 2015                                 |
| 6.63E-06 | 9.62E-07 | 1.09E-01 | 2019 Water column chemistry data collected on board the R/V Endeavor cruise EN586 in the northern Gulf of Mexico from 2016-07-24 to 2016-08-14                  |
| 6.65E-06 | 4.14E-09 | 4.66E-04 | 2017 R/V Endeavor: EN559 Water Column Chemistry and microbial process rate measurements, Gulf of Mexico, May 29 - June 20, 2015                                 |
| 6.74E-06 | 1.54E-07 | 1.71E-02 | 2019 Water column chemistry data collected on board the R/V Endeavor cruise EN586 in the northern Gulf of Mexico from 2016-07-24 to 2016-08-14                  |
| 6.80E-06 | 1.13E-08 | 1.24E-03 | 2017 R/V Endeavor: EN559 Water Column Chemistry and microbial process rate measurements, Gulf of Mexico, May 29 - June 20, 2015                                 |
| 7.03E-06 | 1.05E-08 | 1.12E-03 | 2019 Water column chemistry data collected on board the R/V Endeavor cruise EN586 in the northern Gulf of Mexico from 2016-07-24 to 2016-08-14                  |
| 7.05E-06 | 1.54E-08 | 1.64E-03 | 2017 R/V Endeavor: EN559 Water Column Chemistry and microbial process rate measurements, Gulf of Mexico, May 29 - June 20, 2015                                 |
| 7.22E-06 | 4.58E-07 | 4.75E-02 | 2019 Water column chemistry data collected on board the R/V Endeavor cruise                                                                                     |

|          |          |          |                                                                                                                                                                 |
|----------|----------|----------|-----------------------------------------------------------------------------------------------------------------------------------------------------------------|
|          |          |          | EN586 in the northern Gulf of Mexico from 2016-07-24 to 2016-08-14                                                                                              |
| 7.24E-06 | 1.21E-08 | 1.25E-03 | 2017 R/V Endeavor: EN559 Water Column Chemistry and microbial process rate measurements, Gulf of Mexico, May 29 - June 20, 2015                                 |
| 7.37E-06 | 1.24E-08 | 1.26E-03 | 2017 R/V Endeavor: EN559 Water Column Chemistry and microbial process rate measurements, Gulf of Mexico, May 29 - June 20, 2015                                 |
| 7.54E-06 | 1.58E-07 | 1.57E-02 | 2019 Water column chemistry data collected on board the R/V Endeavor cruise EN586 in the northern Gulf of Mexico from 2016-07-24 to 2016-08-14                  |
| 7.85E-06 | 3.86E-09 | 3.68E-04 | 2017 R/V Endeavor: EN559 Water Column Chemistry and microbial process rate measurements, Gulf of Mexico, May 29 - June 20, 2015                                 |
| 7.88E-06 | 4.05E-10 | 3.85E-05 | 2017 R/V Endeavor: EN559 Water Column Chemistry and microbial process rate measurements, Gulf of Mexico, May 29 - June 20, 2015                                 |
| 7.92E-06 | 8.71E-09 | 8.24E-04 | 2017 R/V Endeavor: EN559 Water Column Chemistry and microbial process rate measurements, Gulf of Mexico, May 29 - June 20, 2015                                 |
| 7.93E-06 | 9.75E-07 | 9.20E-02 | 2019 Water column chemistry data collected on board the R/V Endeavor cruise EN586 in the northern Gulf of Mexico from 2016-07-24 to 2016-08-14                  |
| 8.06E-06 | 9.43E-09 | 8.76E-04 | 2017 R/V Endeavor: EN559 Water Column Chemistry and microbial process rate measurements, Gulf of Mexico, May 29 - June 20, 2015                                 |
| 8.08E-06 | 1.80E-06 | 1.67E-01 | 2019 Water column chemistry data collected on board the R/V Endeavor cruise EN586 in the northern Gulf of Mexico from 2016-07-24 to 2016-08-14                  |
| 8.33E-06 | 1.91E-08 | 1.72E-03 | 2019 Water column chemistry data collected on board the R/V Endeavor cruise EN586 in the northern Gulf of Mexico from 2016-07-24 to 2016-08-14                  |
| 8.40E-06 | 1.85E-07 | 1.65E-02 | 2019 Water column chemistry data collected on board the R/V Endeavor cruise EN586 in the northern Gulf of Mexico from 2016-07-24 to 2016-08-14                  |
| 8.73E-06 | 4.57E-09 | 3.92E-04 | 2017 R/V Endeavor: EN559 Water Column Chemistry and microbial process rate measurements, Gulf of Mexico, May 29 - June 20, 2015                                 |
| 8.99E-06 | 1.00E-07 | 8.33E-03 | 2010 Methane Oxidation in the Eastern Tropical North Pacific                                                                                                    |
| 9.44E-06 | 1.06E-09 | 8.42E-05 | 2019 Water column chemistry data collected on board the R/V Endeavor cruise EN586 in the northern Gulf of Mexico from 2016-07-24 to 2016-08-14                  |
| 9.73E-06 | 4.89E-09 | 3.76E-04 | 2017 R/V Endeavor: EN559 Water Column Chemistry and microbial process rate measurements, Gulf of Mexico, May 29 - June 20, 2015                                 |
| 9.89E-06 | 2.49E-08 | 1.88E-03 | 2019 Water column chemistry data collected on board the R/V Endeavor cruise EN586 in the northern Gulf of Mexico from 2016-07-24 to 2016-08-14                  |
| 1.00E-05 | 2.04E-08 | 1.52E-03 | 2019 Water column chemistry data collected on board the R/V Endeavor cruise EN586 in the northern Gulf of Mexico from 2016-07-24 to 2016-08-14                  |
| 1.00E-05 | 8.62E-09 | 6.44E-04 | 2017 R/V Endeavor: EN559 Water Column Chemistry and microbial process rate measurements, Gulf of Mexico, May 29 - June 20, 2015                                 |
| 1.01E-05 | 3.40E-10 | 2.53E-05 | 2017 R/V Endeavor: EN559 Water Column Chemistry and microbial process rate measurements, Gulf of Mexico, May 29 - June 20, 2015                                 |
| 1.06E-05 | 4.99E-10 | 3.53E-05 | 2017 R/V Endeavor: EN559 Water Column Chemistry and microbial process rate measurements, Gulf of Mexico, May 29 - June 20, 2015                                 |
| 1.07E-05 | 1.99E-06 | 1.39E-01 | 2019 Water column chemistry data collected on board the R/V Endeavor cruise EN586 in the northern Gulf of Mexico from 2016-07-24 to 2016-08-14                  |
| 1.10E-05 | 9.77E-08 | 6.66E-03 | 2019 Methane concentration and oxidation rates in water column data collected aboard the R/V Sikuliaq in the northern Chukchi Sea from 2017-08-11 to 2017-08-20 |
| 1.15E-05 | 4.90E-09 | 3.18E-04 | 2019 Methane concentration and oxidation rates in water column data collected aboard the R/V Sikuliaq in the northern Chukchi Sea from 2017-08-11 to 2017-08-20 |
| 1.18E-05 | 7.80E-09 | 4.95E-04 | 2017 R/V Endeavor: EN559 Water Column Chemistry and microbial process rate measurements, Gulf of Mexico, May 29 - June 20, 2015                                 |
| 1.24E-05 | 3.57E-09 | 2.16E-04 | 2017 R/V Endeavor: EN559 Water Column Chemistry and microbial process rate measurements, Gulf of Mexico, May 29 - June 20, 2015                                 |
| 1.24E-05 | 1.66E-06 | 9.97E-02 | 2019 Water column chemistry data collected on board the R/V Endeavor cruise EN586 in the northern Gulf of Mexico from 2016-07-24 to 2016-08-14                  |
| 1.25E-05 | 4.43E-09 | 2.66E-04 | 2019 Methane concentration and oxidation rates in water column data collected aboard the R/V Sikuliaq in the northern Chukchi Sea from 2017-08-11 to 2017-08-20 |
| 1.26E-05 | 2.45E-06 | 1.46E-01 | 2019 Water column chemistry data collected on board the R/V Endeavor cruise EN586 in the northern Gulf of Mexico from 2016-07-24 to 2016-08-14                  |
| 1.27E-05 | 4.37E-10 | 2.58E-05 | 2017 R/V Endeavor: EN559 Water Column Chemistry and microbial process rate measurements, Gulf of Mexico, May 29 - June 20, 2015                                 |
| 1.27E-05 | 4.12E-08 | 2.42E-03 | 2019 Methane concentration and oxidation rates in water column data collected aboard the R/V Sikuliaq in the northern Chukchi Sea from 2017-08-11 to 2017-08-20 |

|          |          |          |                                                                                                                                                                 |
|----------|----------|----------|-----------------------------------------------------------------------------------------------------------------------------------------------------------------|
| 1.28E-05 | 4.88E-08 | 2.85E-03 | 2019 Methane concentration and oxidation rates in water column data collected aboard the R/V Sikuliaq in the northern Chukchi Sea from 2017-08-11 to 2017-08-20 |
| 1.31E-05 | 2.41E-06 | 1.38E-01 | 2019 Water column chemistry data collected on board the R/V Endeavor cruise EN586 in the northern Gulf of Mexico from 2016-07-24 to 2016-08-14                  |
| 1.33E-05 | 1.22E-06 | 6.87E-02 | 2019 Water column chemistry data collected on board the R/V Endeavor cruise EN586 in the northern Gulf of Mexico from 2016-07-24 to 2016-08-14                  |
| 1.50E-05 | 1.20E-06 | 6.00E-02 | 1989 Methane oxidation in Saanich Inlet during summer stratification                                                                                            |
| 1.56E-05 | 6.57E-09 | 3.16E-04 | 2019 Methane concentration and oxidation rates in water column data collected aboard the R/V Sikuliaq in the northern Chukchi Sea from 2017-08-11 to 2017-08-20 |
| 1.59E-05 | 1.10E-09 | 5.17E-05 | 2019 Methane concentration and oxidation rates in water column data collected aboard the R/V Sikuliaq in the northern Chukchi Sea from 2017-08-11 to 2017-08-20 |
| 1.59E-05 | 1.10E-03 | 5.17E+01 | 2019 Methane concentration and oxidation rates in water column data collected aboard the R/V Sikuliaq in the northern Chukchi Sea from 2017-08-11 to 2017-08-20 |
| 1.61E-05 | 5.22E-08 | 2.43E-03 | 2019 Methane concentration and oxidation rates in water column data collected aboard the R/V Sikuliaq in the northern Chukchi Sea from 2017-08-11 to 2017-08-20 |
| 1.63E-05 | 3.50E-10 | 1.61E-05 | 2019 Methane concentration and oxidation rates in water column data collected aboard the R/V Sikuliaq in the northern Chukchi Sea from 2017-08-11 to 2017-08-20 |
| 1.65E-05 | 2.58E-08 | 1.17E-03 | 2019 Methane concentration and oxidation rates in water column data collected aboard the R/V Sikuliaq in the northern Chukchi Sea from 2017-08-11 to 2017-08-20 |
| 1.72E-05 | 1.11E-07 | 4.84E-03 | 2019 Methane concentration and oxidation rates in water column data collected aboard the R/V Sikuliaq in the northern Chukchi Sea from 2017-08-11 to 2017-08-20 |
| 1.76E-05 | 7.19E-08 | 3.06E-03 | 2019 Methane concentration and oxidation rates in water column data collected aboard the R/V Sikuliaq in the northern Chukchi Sea from 2017-08-11 to 2017-08-20 |
| 1.79E-05 | 4.21E-08 | 1.76E-03 | 2019 Water column chemistry data collected on board the R/V Endeavor cruise EN586 in the northern Gulf of Mexico from 2016-07-24 to 2016-08-14                  |
| 1.79E-05 | 1.44E-07 | 6.02E-03 | 2019 Methane concentration and oxidation rates in water column data collected aboard the R/V Sikuliaq in the northern Chukchi Sea from 2017-08-11 to 2017-08-20 |
| 1.85E-05 | 1.78E-07 | 7.18E-03 | 2019 Methane concentration and oxidation rates in water column data collected aboard the R/V Sikuliaq in the northern Chukchi Sea from 2017-08-11 to 2017-08-20 |
| 1.86E-05 | 1.34E-07 | 5.39E-03 | 2019 Water column chemistry data collected on board the R/V Endeavor cruise EN586 in the northern Gulf of Mexico from 2016-07-24 to 2016-08-14                  |
| 1.89E-05 | 3.95E-06 | 1.56E-01 | 2019 Water column chemistry data collected on board the R/V Endeavor cruise EN586 in the northern Gulf of Mexico from 2016-07-24 to 2016-08-14                  |
| 1.91E-05 | 1.44E-09 | 5.63E-05 | 2019 Methane concentration and oxidation rates in water column data collected aboard the R/V Sikuliaq in the northern Chukchi Sea from 2017-08-11 to 2017-08-20 |
| 1.97E-05 | 1.89E-07 | 7.18E-03 | 2019 Methane concentration and oxidation rates in water column data collected aboard the R/V Sikuliaq in the northern Chukchi Sea from 2017-08-11 to 2017-08-20 |
| 2.06E-05 | 1.88E-07 | 6.84E-03 | 2019 Methane concentration and oxidation rates in water column data collected aboard the R/V Sikuliaq in the northern Chukchi Sea from 2017-08-11 to 2017-08-20 |
| 2.09E-05 | 4.32E-07 | 1.55E-02 | 2019 Water column chemistry data collected on board the R/V Endeavor cruise EN586 in the northern Gulf of Mexico from 2016-07-24 to 2016-08-14                  |
| 2.24E-05 | 5.01E-08 | 1.67E-03 | 2019 Methane concentration and oxidation rates in water column data collected aboard the R/V Sikuliaq in the northern Chukchi Sea from 2017-08-11 to 2017-08-20 |
| 2.26E-05 | 4.19E-06 | 1.39E-01 | 2019 Water column chemistry data collected on board the R/V Endeavor cruise EN586 in the northern Gulf of Mexico from 2016-07-24 to 2016-08-14                  |
| 2.27E-05 | 1.42E-06 | 4.69E-02 | 2016 R/V Endeavor: EN528 Water and Sediment Chemistry, Gulf of Mexico, July 7-22, 2014                                                                          |
| 2.35E-05 | 6.44E-09 | 2.06E-04 | 2019 Methane concentration and oxidation rates in water column data collected aboard the R/V Sikuliaq in the northern Chukchi Sea from 2017-08-11 to 2017-08-20 |

|          |          |          |                                                                                                                                                                 |
|----------|----------|----------|-----------------------------------------------------------------------------------------------------------------------------------------------------------------|
| 2.35E-05 | 1.38E-08 | 4.40E-04 | 2019 Methane concentration and oxidation rates in water column data collected aboard the R/V Sikuliaq in the northern Chukchi Sea from 2017-08-11 to 2017-08-20 |
| 2.36E-05 | 4.64E-07 | 1.47E-02 | 2019 Methane concentration and oxidation rates in water column data collected aboard the R/V Sikuliaq in the northern Chukchi Sea from 2017-08-11 to 2017-08-20 |
| 2.49E-05 | 2.51E-07 | 7.56E-03 | 2019 Methane concentration and oxidation rates in water column data collected aboard the R/V Sikuliaq in the northern Chukchi Sea from 2017-08-11 to 2017-08-20 |
| 2.56E-05 | 2.75E-07 | 8.06E-03 | 2019 Methane concentration and oxidation rates in water column data collected aboard the R/V Sikuliaq in the northern Chukchi Sea from 2017-08-11 to 2017-08-20 |
| 2.59E-05 | 7.97E-09 | 2.30E-04 | 2019 Methane concentration and oxidation rates in water column data collected aboard the R/V Sikuliaq in the northern Chukchi Sea from 2017-08-11 to 2017-08-20 |
| 2.63E-05 | 2.47E-08 | 7.02E-04 | 2019 Methane concentration and oxidation rates in water column data collected aboard the R/V Sikuliaq in the northern Chukchi Sea from 2017-08-11 to 2017-08-20 |
| 2.64E-05 | 2.08E-07 | 5.89E-03 | 2019 Methane concentration and oxidation rates in water column data collected aboard the R/V Sikuliaq in the northern Chukchi Sea from 2017-08-11 to 2017-08-20 |
| 2.69E-05 | 4.71E-08 | 1.31E-03 | 2019 Methane concentration and oxidation rates in water column data collected aboard the R/V Sikuliaq in the northern Chukchi Sea from 2017-08-11 to 2017-08-20 |
| 2.73E-05 | 5.49E-09 | 1.51E-04 | 2019 Methane concentration and oxidation rates in water column data collected aboard the R/V Sikuliaq in the northern Chukchi Sea from 2017-08-11 to 2017-08-20 |
| 2.75E-05 | 2.07E-07 | 5.63E-03 | 2019 Methane concentration and oxidation rates in water column data collected aboard the R/V Sikuliaq in the northern Chukchi Sea from 2017-08-11 to 2017-08-20 |
| 2.77E-05 | 1.14E-07 | 3.06E-03 | 2019 Methane concentration and oxidation rates in water column data collected aboard the R/V Sikuliaq in the northern Chukchi Sea from 2017-08-11 to 2017-08-20 |
| 2.95E-05 | 1.19E-08 | 3.03E-04 | 2019 Methane concentration and oxidation rates in water column data collected aboard the R/V Sikuliaq in the northern Chukchi Sea from 2017-08-11 to 2017-08-20 |
| 2.96E-05 | 2.04E-08 | 5.16E-04 | 2019 Methane concentration and oxidation rates in water column data collected aboard the R/V Sikuliaq in the northern Chukchi Sea from 2017-08-11 to 2017-08-20 |
| 3.29E-05 | 5.04E-07 | 1.15E-02 | 2019 Methane concentration and oxidation rates in water column data collected aboard the R/V Sikuliaq in the northern Chukchi Sea from 2017-08-11 to 2017-08-20 |
| 3.42E-05 | 2.97E-06 | 6.50E-02 | 2016 R/V Endeavor: EN528 Water and Sediment Chemistry, Gulf of Mexico, July 7-22, 2014                                                                          |
| 3.53E-05 | 4.05E-07 | 8.60E-03 | 2019 Methane concentration and oxidation rates in water column data collected aboard the R/V Sikuliaq in the northern Chukchi Sea from 2017-08-11 to 2017-08-20 |
| 3.64E-05 | 5.00E-06 | 1.03E-01 | 2019 Water column chemistry data collected on board the R/V Endeavor cruise EN586 in the northern Gulf of Mexico from 2016-07-24 to 2016-08-14                  |
| 3.68E-05 | 6.23E-06 | 1.27E-01 | 2019 Water column chemistry data collected on board the R/V Endeavor cruise EN586 in the northern Gulf of Mexico from 2016-07-24 to 2016-08-14                  |
| 3.83E-05 | 2.64E-07 | 5.17E-03 | 2019 Methane concentration and oxidation rates in water column data collected aboard the R/V Sikuliaq in the northern Chukchi Sea from 2017-08-11 to 2017-08-20 |
| 3.91E-05 | 4.81E-06 | 9.22E-02 | 2016 R/V Endeavor: EN528 Water and Sediment Chemistry, Gulf of Mexico, July 7-22, 2014                                                                          |
| 3.94E-05 | 2.81E-06 | 5.34E-02 | 2019 Water column chemistry data collected on board the R/V Endeavor cruise EN586 in the northern Gulf of Mexico from 2016-07-24 to 2016-08-14                  |
| 4.05E-05 | 9.50E-06 | 1.76E-01 | 2010 Methane Oxidation Potential in the Water Column of Two Diverse Coastal Marine Sites                                                                        |
| 4.26E-05 | 4.48E-06 | 7.87E-02 | 2019 Water column chemistry data collected on board the R/V Endeavor cruise EN586 in the northern Gulf of Mexico from 2016-07-24 to 2016-08-14                  |
| 5.00E-05 | 5.80E-07 | 8.69E-03 | 2019 Methane concentration and oxidation rates in water column data collected aboard the R/V Sikuliaq in the northern Chukchi Sea from 2017-08-11 to 2017-08-20 |

|          |          |          |                                                                                                                                                                 |
|----------|----------|----------|-----------------------------------------------------------------------------------------------------------------------------------------------------------------|
| 5.37E-05 | 5.35E-07 | 7.45E-03 | 2019 Methane concentration and oxidation rates in water column data collected aboard the R/V Sikuliaq in the northern Chukchi Sea from 2017-08-11 to 2017-08-20 |
| 5.63E-05 | 5.69E-05 | 7.58E-01 | 2003 Methane Oxidation Potential in the Water Column of Two Diverse Coastal Marine Sites                                                                        |
| 5.99E-05 | 2.50E-07 | 3.13E-03 | 1989 Methane oxidation in Saanich Inlet during summer stratification                                                                                            |
| 6.02E-05 | 1.26E-06 | 1.57E-02 | 2019 Water column chemistry data collected on board the R/V Endeavor cruise EN586 in the northern Gulf of Mexico from 2016-07-24 to 2016-08-14                  |
| 6.02E-05 | 6.50E-06 | 8.08E-02 | 2003 Methane Oxidation Potential in the Water Column of Two Diverse Coastal Marine Sites                                                                        |
| 6.81E-05 | 1.33E-07 | 1.46E-03 | 2019 Water column chemistry data collected on board the R/V Endeavor cruise EN586 in the northern Gulf of Mexico from 2016-07-24 to 2016-08-14                  |
| 6.95E-05 | 1.04E-05 | 1.13E-01 | 2016 R/V Endeavor: EN528 Water and Sediment Chemistry, Gulf of Mexico, July 7-22, 2017                                                                          |
| 7.51E-05 | 3.24E-06 | 3.23E-02 | 2019 Water column chemistry data collected on board the R/V Endeavor cruise EN586 in the northern Gulf of Mexico from 2016-07-24 to 2016-08-14                  |
| 8.76E-05 | 7.67E-06 | 6.55E-02 | 2019 Water column chemistry data collected on board the R/V Endeavor cruise EN586 in the northern Gulf of Mexico from 2016-07-24 to 2016-08-14                  |
| 1.03E-04 | 1.08E-05 | 7.81E-02 | 2019 Water column chemistry data collected on board the R/V Endeavor cruise EN586 in the northern Gulf of Mexico from 2016-07-24 to 2016-08-14                  |
| 1.06E-04 | 6.00E-07 | 4.23E-03 | 2010 Distributions of putative aerobic methanotrophs in diverse pelagic marine environments                                                                     |
| 1.14E-04 | 9.38E-06 | 6.15E-02 | 2019 Water column chemistry data collected on board the R/V Endeavor cruise EN586 in the northern Gulf of Mexico from 2016-07-24 to 2016-08-14                  |
| 1.16E-04 | 1.74E-05 | 1.12E-01 | 2003 Methane Oxidation Potential in the Water Column of Two Diverse Coastal Marine Sites                                                                        |
| 1.17E-04 | 1.84E-05 | 1.18E-01 | 2019 Water column chemistry data collected on board the R/V Endeavor cruise EN586 in the northern Gulf of Mexico from 2016-07-24 to 2016-08-14                  |
| 1.27E-04 | 1.42E-05 | 8.40E-02 | 2003 Methane Oxidation Potential in the Water Column of Two Diverse Coastal Marine Sites                                                                        |
| 1.34E-04 | 2.67E-05 | 1.49E-01 | 2019 Water column chemistry data collected on board the R/V Endeavor cruise EN586 in the northern Gulf of Mexico from 2016-07-24 to 2016-08-14                  |
| 1.43E-04 | 5.06E-05 | 2.66E-01 | 2003 Methane Oxidation Potential in the Water Column of Two Diverse Coastal Marine Sites                                                                        |
| 1.92E-04 | 1.00E-05 | 3.89E-02 | 2003 Methane Oxidation Potential in the Water Column of Two Diverse Coastal Marine Sites                                                                        |
| 2.05E-04 | 7.00E-07 | 2.55E-03 | 2010 Distributions of putative aerobic methanotrophs in diverse pelagic marine environments                                                                     |
| 2.05E-04 | 7.00E-07 | 2.55E-03 | 2010 Distributions of putative aerobic methanotrophs in diverse pelagic marine environments                                                                     |
| 2.54E-04 | 2.05E-07 | 6.04E-04 | 2019 Water column chemistry data collected on board the R/V Endeavor cruise EN586 in the northern Gulf of Mexico from 2016-07-24 to 2016-08-14                  |
| 2.54E-04 | 2.05E-07 | 6.04E-04 | 2019 Water column chemistry data collected on board the R/V Endeavor cruise EN586 in the northern Gulf of Mexico from 2016-07-24 to 2016-08-14                  |
| 2.57E-04 | 2.81E-05 | 8.19E-02 | 2003 Methane Oxidation Potential in the Water Column of Two Diverse Coastal Marine Sites                                                                        |
| 2.62E-04 | 2.00E-06 | 5.71E-03 | 1989 Methane oxidation in Saanich Inlet during summer stratification                                                                                            |
| 4.26E-04 | 9.33E-05 | 1.64E-01 | 2019 Water column chemistry data collected on board the R/V Endeavor cruise EN586 in the northern Gulf of Mexico from 2016-07-24 to 2016-08-14                  |
| 4.26E-04 | 9.33E-05 | 1.64E-01 | 2019 Water column chemistry data collected on board the R/V Endeavor cruise EN586 in the northern Gulf of Mexico from 2016-07-24 to 2016-08-14                  |
| 5.12E-04 | 3.60E-05 | 5.27E-02 | 2019 Water column chemistry data collected on board the R/V Endeavor cruise EN586 in the northern Gulf of Mexico from 2016-07-24 to 2016-08-14                  |
| 5.28E-04 | 3.16E-05 | 4.47E-02 | 2019 Water column chemistry data collected on board the R/V Endeavor cruise EN586 in the northern Gulf of Mexico from 2016-07-24 to 2016-08-14                  |
| 2.10E-03 | 2.00E-06 | 7.14E-04 | 2010 Propane Respiration Jump-Starts Microbial Response to a Deep Oil Spill                                                                                     |
| 2.47E-03 | 4.36E-04 | 1.32E-01 | 2016 R/V Endeavor: EN528 Water and Sediment Chemistry, Gulf of Mexico, July 7-22, 2018                                                                          |
| 2.47E-03 | 4.20E-05 | 1.27E-02 | 2010 Propane Respiration Jump-Starts Microbial Response to a Deep Oil Spill                                                                                     |
| 3.00E-03 | 3.40E-11 | 8.50E-09 | 2015 Methane oxidation in the eastern tropical North Pacific Ocean water column                                                                                 |
| 3.00E-03 | 4.00E-06 | 1.00E-03 | 2015 Methane oxidation in the eastern tropical North Pacific Ocean water column                                                                                 |
| 3.45E-03 | 1.00E-06 | 2.17E-04 | 2010 Propane Respiration Jump-Starts Microbial Response to a Deep Oil Spill                                                                                     |

|          |          |          |                                                                                |
|----------|----------|----------|--------------------------------------------------------------------------------|
| 3.89E-03 | 1.00E-06 | 1.92E-04 | 2010 Propane Respiration Jump-Starts Microbial Response to a Deep Oil Spill    |
| 3.97E-03 | 1.00E-06 | 1.89E-04 | 2010 Propane Respiration Jump-Starts Microbial Response to a Deep Oil Spill    |
| 6.74E-03 | 1.00E-06 | 1.11E-04 | 2010 Propane Respiration Jump-Starts Microbial Response to a Deep Oil Spill    |
| 8.24E-03 | 7.00E-06 | 6.36E-04 | 2010 Propane Respiration Jump-Starts Microbial Response to a Deep Oil Spill    |
| 8.99E-03 | 4.40E-05 | 3.67E-03 | 2010 Propane Respiration Jump-Starts Microbial Response to a Deep Oil Spill    |
| 9.74E-03 | 8.20E-04 | 6.31E-02 | 2010 Propane Respiration Jump-Starts Microbial Response to a Deep Oil Spill    |
| 2.02E-02 | 1.50E-05 | 5.56E-04 | 2010 Propane Respiration Jump-Starts Microbial Response to a Deep Oil Spill    |
| 2.17E-02 | 1.00E-05 | 3.45E-04 | 2010 Propane Respiration Jump-Starts Microbial Response to a Deep Oil Spill    |
| 2.77E-02 | 9.00E-06 | 2.43E-04 | 2010 Propane Respiration Jump-Starts Microbial Response to a Deep Oil Spill    |
| 3.60E-02 | 9.00E-06 | 1.88E-04 | 2010 Propane Respiration Jump-Starts Microbial Response to a Deep Oil Spill    |
| 4.12E-02 | 1.90E-05 | 3.45E-04 | 2010 Propane Respiration Jump-Starts Microbial Response to a Deep Oil Spill    |
| 4.64E-02 | 1.40E-05 | 2.26E-04 | 2010 Propane Respiration Jump-Starts Microbial Response to a Deep Oil Spill    |
| 4.79E-02 | 2.10E-05 | 3.28E-04 | 2010 Propane Respiration Jump-Starts Microbial Response to a Deep Oil Spill    |
| 5.69E-02 | 1.80E-05 | 2.37E-04 | 2010 Propane Respiration Jump-Starts Microbial Response to a Deep Oil Spill    |
| 6.14E-02 | 2.50E-05 | 3.05E-04 | 2010 Propane Respiration Jump-Starts Microbial Response to a Deep Oil Spill    |
| 7.34E-02 | 1.20E-05 | 1.22E-04 | 2010 Propane Respiration Jump-Starts Microbial Response to a Deep Oil Spill    |
| 9.51E-02 | 1.10E-05 | 8.66E-05 | 2010 Propane Respiration Jump-Starts Microbial Response to a Deep Oil Spill    |
| 9.96E-02 | 2.30E-05 | 1.73E-04 | 2010 Propane Respiration Jump-Starts Microbial Response to a Deep Oil Spill    |
| 2.00E-01 | 4.00E-02 | -        | 2005 Microbial methane turnover in different marine habitats                   |
| 2.00E-01 | 3.00E-02 | -        | 2005 Microbial methane turnover in different marine habitats                   |
| 2.00E-01 | 1.00E-01 | -        | 2005 Microbial methane turnover in different marine habitats                   |
| 2.00E-01 | 1.60E-01 | -        | 2005 Microbial methane turnover in different marine habitats                   |
| 2.00E-01 | 4.00E-01 | -        | 2005 Microbial methane turnover in different marine habitats                   |
| 1.38E-01 | 5.90E-03 | -        | 2014 The rise and fall of methanotrophy following a deepwater oil-well blowout |

**Table S8.** The rates of anaerobic methane oxidation in freshwater systems.

| Freshwaters, Anaerobic |                                                                      |                      |                                                                                                                                                           |
|------------------------|----------------------------------------------------------------------|----------------------|-----------------------------------------------------------------------------------------------------------------------------------------------------------|
| CH <sub>4</sub> (atm)  | Rates<br>( $\mu\text{mol/g/d}$ or<br>$\mu\text{mol/cm}^3/\text{d}$ ) | K (d <sup>-1</sup> ) | Reference                                                                                                                                                 |
| 9.50E-01               | 3.00E-06                                                             | 2.43E-09             | 2016 Methane dependent denitrification- from ecosystem to laboratory-scale enrichment for engineering applications                                        |
| 9.50E-01               | 3.10E-05                                                             | 2.51E-08             | 2017 Methane dependent denitrification- from ecosystem to laboratory-scale enrichment for engineering applications                                        |
| 9.50E-01               | 4.00E-05                                                             | 3.24E-08             | 2018 Methane dependent denitrification- from ecosystem to laboratory-scale enrichment for engineering applications                                        |
| 9.50E-01               | 4.40E-05                                                             | 3.56E-08             | 2019 Methane dependent denitrification- from ecosystem to laboratory-scale enrichment for engineering applications                                        |
| 1.00E-01               | 7.00E-05                                                             | 5.38E-07             | 2020 Anaerobic oxidation of methane with denitrification in sediments of a subtropical estuary: Rates, controlling factors and environmental implications |
| 9.50E-01               | 7.00E-05                                                             | 5.67E-08             | 2018 Methane dependent denitrification- from ecosystem to laboratory-scale enrichment for engineering applications                                        |
| 9.50E-01               | 1.01E-04                                                             | 8.18E-08             | 2018 Methane dependent denitrification- from ecosystem to laboratory-scale enrichment for engineering applications                                        |
| 1.00E-02               | 2.00E-04                                                             | 1.54E-05             | 2019 Active pathways of anaerobic methane oxidation across contrasting riverbed                                                                           |
| 1.00E-01               | 2.80E-04                                                             | 2.15E-06             | 2020 Anaerobic oxidation of methane with denitrification in sediments of a subtropical estuary: Rates, controlling factors and environmental implications |
| 1.00E-02               | 4.00E-04                                                             | 3.08E-05             | 2019 Active pathways of anaerobic methane oxidation across contrasting riverbed                                                                           |
| 1.00E-02               | 4.00E-04                                                             | 3.08E-05             | 2019 Active pathways of anaerobic methane oxidation across contrasting riverbed                                                                           |
| 1.00E-02               | 5.00E-04                                                             | 3.85E-05             | 2019 Active pathways of anaerobic methane oxidation across contrasting riverbed                                                                           |
| 1.00E-02               | 5.00E-04                                                             | 3.85E-05             | 2019 Active pathways of anaerobic methane oxidation across contrasting riverbed                                                                           |
| 1.00E-02               | 8.00E-04                                                             | 6.15E-05             | 2019 Active pathways of anaerobic methane oxidation across contrasting riverbed                                                                           |
| 1.00E-02               | 9.00E-04                                                             | 6.92E-05             | 2019 Active pathways of anaerobic methane oxidation across contrasting riverbed                                                                           |
| 1.00E-02               | 1.10E-03                                                             | 8.46E-05             | 2019 Active pathways of anaerobic methane oxidation across contrasting riverbed                                                                           |

|          |          |          |                                                                                                                                          |
|----------|----------|----------|------------------------------------------------------------------------------------------------------------------------------------------|
| 1.00E-02 | 1.20E-03 | 9.23E-05 | 2019 Active pathways of anaerobic methane oxidation across contrasting riverbed                                                          |
| 1.00E-02 | 1.40E-03 | 1.08E-04 | 2019 Active pathways of anaerobic methane oxidation across contrasting riverbed                                                          |
| 1.00E-02 | 1.70E-03 | 1.31E-04 | 2019 Active pathways of anaerobic methane oxidation across contrasting riverbed                                                          |
| 1.00E-02 | 2.00E-03 | 1.54E-04 | 2019 Active pathways of anaerobic methane oxidation across contrasting riverbed                                                          |
| 1.00E-02 | 2.20E-03 | 1.69E-04 | 2019 Active pathways of anaerobic methane oxidation across contrasting riverbed                                                          |
| 1.00E-02 | 2.90E-03 | 2.23E-04 | 2019 Active pathways of anaerobic methane oxidation across contrasting riverbed                                                          |
| 1.00E-02 | 3.40E-03 | 2.62E-04 | 2019 Active pathways of anaerobic methane oxidation across contrasting riverbed                                                          |
| 1.00E-02 | 3.50E-03 | 2.69E-04 | 2019 Active pathways of anaerobic methane oxidation across contrasting riverbed                                                          |
| 1.00E-02 | 3.60E-03 | 2.77E-04 | 2019 Active pathways of anaerobic methane oxidation across contrasting riverbed                                                          |
| 1.00E-02 | 4.10E-03 | 3.15E-04 | 2019 Active pathways of anaerobic methane oxidation across contrasting riverbeds                                                         |
| 4.00E-02 | 4.90E-03 | 9.42E-05 | 2015 The short- and long-term effects of environmental conditions on anaerobic methane oxidation coupled to nitrite reduction            |
| 1.00E-02 | 5.00E-03 | 3.85E-04 | 2019 Active pathways of anaerobic methane oxidation across contrasting riverbeds                                                         |
| 1.00E-02 | 5.00E-03 | 3.85E-04 | 2019 Active pathways of anaerobic methane oxidation across contrasting riverbeds                                                         |
| 1.00E-02 | 5.50E-03 | 4.23E-04 | 2019 Active pathways of anaerobic methane oxidation across contrasting riverbeds                                                         |
| 1.00E-02 | 7.00E-03 | 5.38E-04 | 2019 Active pathways of anaerobic methane oxidation across contrasting riverbeds                                                         |
| 1.00E-02 | 1.09E-02 | 8.38E-04 | 2019 Active pathways of anaerobic methane oxidation across contrasting riverbeds                                                         |
| 1.00E-02 | 1.20E-02 | 9.23E-04 | 2019 Active pathways of anaerobic methane oxidation across contrasting riverbeds                                                         |
| 1.00E-01 | 1.24E-02 | 9.54E-05 | 2015 The short- and long-term effects of environmental conditions on anaerobic methane oxidation coupled to nitrite reduction            |
| 1.00E-02 | 1.30E-02 | 1.00E-03 | 2019 Active pathways of anaerobic methane oxidation across contrasting riverbeds                                                         |
| 1.00E-02 | 1.50E-02 | 1.15E-03 | 2019 Active pathways of anaerobic methane oxidation across contrasting riverbeds                                                         |
| 1.00E-02 | 2.10E-02 | 1.62E-03 | 2019 Active pathways of anaerobic methane oxidation across contrasting riverbeds                                                         |
| 1.00E+00 | 1.10E-03 | 8.46E-07 | 2020 Anaerobic oxidation of methane and associated microbiome in anoxic water of Northwestern Siberian lakes                             |
| 1.00E+00 | 1.07E-01 | 8.23E-05 | 2020 Comparison of Anaerobic Methane Oxidation in Different Sediment Habitats of Dianchi Lake                                            |
| 1.00E+00 | 3.17E-01 | 2.44E-04 | 2020 Comparison of Anaerobic Methane Oxidation in Different Sediment Habitats of Dianchi Lake                                            |
| 1.00E+00 | 5.78E-02 | 4.45E-05 | 2015 The short- and long-term effects of environmental conditions on anaerobic methane oxidation coupled to nitrite reduction            |
| 1.54E-02 | 1.40E-02 | 7.00E-04 | 2014 Nitrate-dependent anaerobic methane oxidation in a freshwater sediment                                                              |
| 3.85E-01 | 4.00E-01 | 8.00E-04 | 2014 Nitrate-dependent anaerobic methane oxidation in a freshwater sediment                                                              |
| 1.00E-01 | 7.20E-03 | 5.54E-05 | 2019 Denitrification-Dependent Anaerobic Oxidation of Methane in Freshwater Sediments of Reservoirs in SE Poland.                        |
| 3.00E-01 | 2.50E-02 | 6.41E-05 | 2019 Denitrification-Dependent Anaerobic Oxidation of Methane in Freshwater Sediments of Reservoirs in SE Poland.                        |
| 4.60E-03 | 6.00E-05 | 1.00E-05 | 2015 More evidence that anaerobic oxidation of methane is prevalent in soils: Is it time to upgrade our biogeochemical models            |
| 5.00E-02 | 2.00E-04 | 3.08E-06 | 2018 Anaerobic methane oxidation and aerobic methane production in an east African great lake (Lake Kivu)                                |
| 5.30E-01 | 1.60E-02 | 2.32E-05 | 2018 Anaerobic methane oxidation and aerobic methane production in an east African great lake (Lake Kivu)                                |
| 4.15E-02 | 1.10E-03 | 2.04E-05 | 2018 Anaerobic methane oxidation and aerobic methane production in an east African great lake (Lake Kivu)                                |
| 6.04E-01 | 4.00E-04 | 5.10E-07 | 2018 Anaerobic methane oxidation and aerobic methane production in an east African great lake (Lake Kivu)                                |
| 3.85E-02 | 6.00E-05 | 1.20E-06 | 2018 Anaerobic methane oxidation and aerobic methane production in an east African great lake (Lake Kivu)                                |
| 4.23E-02 | 2.20E-03 | 4.00E-05 | 2018 Anaerobic methane oxidation and aerobic methane production in an east African great lake (Lake Kivu)                                |
| 7.69E-03 | 1.80E-03 | 1.80E-04 | 2018 Anaerobic methane oxidation and aerobic methane production in an east African great lake (Lake Kivu)                                |
| 9.23E-03 | 4.20E-03 | 3.50E-04 | 2018 Anaerobic methane oxidation and aerobic methane production in an east African great lake (Lake Kivu)                                |
| 3.72E-01 | 1.17E-01 | 2.42E-04 | 2018 Anaerobic methane oxidation and aerobic methane production in an east African great lake (Lake Kivu)                                |
| 1.00E-01 | 1.55E-02 | 1.19E-04 | 2013 Impact of electron acceptor availability on the anaerobic oxidation of methane in coastal freshwater and brackish wetland sediments |

|          |          |          |                                                                                                                                                                                  |
|----------|----------|----------|----------------------------------------------------------------------------------------------------------------------------------------------------------------------------------|
| 5.00E-02 | 3.96E-01 | 6.09E-03 | 2019 Anaerobic Methane Oxidation in High-Arctic Alaskan Peatlands as a Significant Control on Net CH <sub>4</sub> Flux                                                           |
| 1.00E+00 | 5.14E-04 | 3.95E-07 | 2020 Microbial methane production and oxidation in the Holocene mud beneath the Kanto Plain of central Japan                                                                     |
| 7.69E-02 | 5.00E-03 | 5.00E-05 | 2017 Anaerobic Methanotrophic Archaea of the ANME-2d Cluster Are Active in a Low-sulfate, Iron-rich Freshwater Sediment                                                          |
| 2.46E+00 | 3.42E-03 | 1.07E-06 | 2018 A methanotrophic archaeon couples anaerobic oxidation of methane to Fe(III) reduction                                                                                       |
| 3.08E-01 | 3.60E-02 | 9.00E-05 | 2013 Anaerobic oxidation of methane in an iron-rich Danish freshwater lake sediment                                                                                              |
| 5.00E-02 | 2.52E-01 | 3.88E-03 | 2019 Anaerobic Methane Oxidation in High-Arctic Alaskan Peatlands as a Significant Control on Net CH <sub>4</sub> Flux                                                           |
| 1.92E+00 | 2.10E-03 | 8.40E-07 | 2020 Manganese/iron-supported sulfate-dependent anaerobic oxidation of methane by archaea in lake sediments                                                                      |
| 1.92E+00 | 1.50E-02 | 6.00E-06 | 2020 Manganese/iron-supported sulfate-dependent anaerobic oxidation of methane by archaea in lake sediments                                                                      |
| 1.38E+00 | 5.00E-03 | 2.78E-06 | 2020 Manganese/iron-supported sulfate-dependent anaerobic oxidation of methane by archaea in lake sediments                                                                      |
| 1.00E+00 | 2.00E-03 | 1.54E-06 | 2017 Effects of alternative electron acceptors on the activity and community structure of methane-producing and consuming microbes in the sediments of two shallow boreal lakes. |
| 1.00E+00 | 6.00E-04 | 4.62E-07 | 2017 Effects of alternative electron acceptors on the activity and community structure of methane-producing and consuming microbes in the sediments of two shallow boreal lakes. |
| 9.09E-02 | 2.09E-02 | 1.77E-04 | 2018 Ubiquitous and significant anaerobic oxidation of methane in freshwater lake sediments                                                                                      |
| 1.54E-06 | 1.81E-01 | 9.05E+01 | 2019 Rates and pathways of CH <sub>4</sub> oxidation in ferruginous Lake Matano, Indonesia                                                                                       |
| 1.54E-06 | 4.70E-03 | 2.35E+00 | 2019 Rates and pathways of CH <sub>4</sub> oxidation in ferruginous Lake Matano, Indonesia                                                                                       |
| 2.71E-04 | 2.00E-04 | 5.68E-04 | 2011 Biogeochemical modelling of anaerobic vs. aerobic methane oxidation in a meromictic crater lake (Lake Pavin, France)                                                        |
| 2.44E-02 | 4.70E-02 | 1.48E-03 | 2018 Anaerobic methane oxidation potential and bacteria in freshwater lakes: Seasonal changes and the influence of trophic status                                                |
| 2.44E-02 | 3.32E-01 | 1.05E-02 | 2018 Anaerobic methane oxidation potential and bacteria in freshwater lakes: Seasonal changes and the influence of trophic status                                                |
| 5.00E-01 | 4.80E-03 | 7.38E-06 | 2011 Anaerobic Oxidation of Methane in Sediments of Lake Constance, an Oligotrophic Freshwater Lake                                                                              |
| 1.00E-02 | 4.40E-02 | 3.38E-03 | 2011 Anaerobic Oxidation of Methane in Sediments of Lake Constance, an Oligotrophic Freshwater Lake                                                                              |
| 7.69E-03 | 3.60E-03 | 3.60E-04 | 2011 Anaerobic Oxidation of Methane in Sediments of Lake Constance, an Oligotrophic Freshwater Lake                                                                              |
| 7.69E-03 | 2.70E-03 | 2.70E-04 | 2011 Anaerobic Oxidation of Methane in Sediments of Lake Constance, an Oligotrophic Freshwater Lake                                                                              |
| 7.69E-03 | 1.80E-03 | 1.80E-04 | 2011 Anaerobic Oxidation of Methane in Sediments of Lake Constance, an Oligotrophic Freshwater Lake                                                                              |
| 7.69E-03 | 6.00E-04 | 6.00E-05 | 2011 Anaerobic Oxidation of Methane in Sediments of Lake Constance, an Oligotrophic Freshwater Lake                                                                              |
| 9.90E-03 | 9.60E-03 | 7.46E-04 | 2020 Anaerobic Oxidation of Methane in Freshwater Sediments of Rzeszów Reservoir                                                                                                 |
| 9.90E-03 | 3.36E-02 | 2.61E-03 | 2020 Anaerobic Oxidation of Methane in Freshwater Sediments of Rzeszów Reservoir                                                                                                 |
| 9.90E-03 | 2.16E-02 | 1.68E-03 | 2020 Anaerobic Oxidation of Methane in Freshwater Sediments of Rzeszów Reservoir                                                                                                 |
| 9.90E-03 | 2.40E-02 | 1.86E-03 | 2020 Anaerobic Oxidation of Methane in Freshwater Sediments of Rzeszów Reservoir                                                                                                 |
| 4.76E-02 | 1.10E-01 | 1.78E-03 | 2017 Anaerobic oxidation of methane by aerobic methanotrophs in sub-Arctic lake sediments                                                                                        |
| 2.38E-02 | 4.70E-02 | 1.52E-03 | 2018 Anaerobic methane oxidation potential and bacteria in freshwater lakes: Seasonal changes and the influence of trophic status                                                |
| 2.38E-02 | 5.20E-02 | 1.68E-03 | 2018 Anaerobic methane oxidation potential and bacteria in freshwater lakes: Seasonal changes and the influence of trophic status                                                |
| 2.38E-02 | 7.50E-02 | 2.42E-03 | 2018 Anaerobic methane oxidation potential and bacteria in freshwater lakes: Seasonal changes and the influence of trophic status                                                |
| 2.38E-02 | 1.50E-01 | 4.85E-03 | 2018 Anaerobic methane oxidation potential and bacteria in freshwater lakes: Seasonal changes and the influence of trophic status                                                |

|          |          |          |                                                                                                                                   |
|----------|----------|----------|-----------------------------------------------------------------------------------------------------------------------------------|
| 2.38E-02 | 2.50E-01 | 8.08E-03 | 2018 Anaerobic methane oxidation potential and bacteria in freshwater lakes: Seasonal changes and the influence of trophic status |
| 2.38E-02 | 3.50E-01 | 1.13E-02 | 2018 Anaerobic methane oxidation potential and bacteria in freshwater lakes: Seasonal changes and the influence of trophic status |
| 2.38E-02 | 1.80E-01 | 5.82E-03 | 2018 Anaerobic methane oxidation potential and bacteria in freshwater lakes: Seasonal changes and the influence of trophic status |
| 2.38E-02 | 1.20E-01 | 3.88E-03 | 2018 Anaerobic methane oxidation potential and bacteria in freshwater lakes: Seasonal changes and the influence of trophic status |
| 2.38E-02 | 3.00E-01 | 9.70E-03 | 2018 Anaerobic methane oxidation potential and bacteria in freshwater lakes: Seasonal changes and the influence of trophic status |

**Table S9.** The rates of aerobic methane oxidation in freshwater systems.

| Freshwaters, Aerobic  |                                                                      |                      |                                                                                                                                                                                  |
|-----------------------|----------------------------------------------------------------------|----------------------|----------------------------------------------------------------------------------------------------------------------------------------------------------------------------------|
| CH <sub>4</sub> (atm) | Rates<br>( $\mu\text{mol/g/d}$ or<br>$\mu\text{mol/cm}^3\text{/d}$ ) | K (d <sup>-1</sup> ) | Reference                                                                                                                                                                        |
| 2.31E-05              | 8.00E-07                                                             | 2.67E-05             | 2007 Significance of pelagic aerobic methane oxidation in the methane and carbon budget of a tropical reservoir                                                                  |
| 3.85E-05              | 1.00E-06                                                             | 2.00E-05             | 2007 Significance of pelagic aerobic methane oxidation in the methane and carbon budget of a tropical reservoir                                                                  |
| 3.85E-04              | 2.50E-06                                                             | 5.00E-06             | 2018 Anaerobic methane oxidation and aerobic methane production in an east African great lake (Lake Kivu)                                                                        |
| 7.69E-05              | 2.90E-06                                                             | 2.90E-05             | 2007 Significance of pelagic aerobic methane oxidation in the methane and carbon budget of a tropical reservoir                                                                  |
| 7.69E-04              | 5.00E-06                                                             | 5.00E-06             | 2005 Aerobic methane oxidation and methanotroph community composition during seasonal stratification in Mono Lake, California (USA)                                              |
| 4.62E-05              | 6.00E-06                                                             | 1.00E-04             | 2018 Anaerobic methane oxidation and aerobic methane production in an east African great lake (Lake Kivu)                                                                        |
| 6.15E-05              | 7.20E-06                                                             | 9.00E-05             | 2007 Significance of pelagic aerobic methane oxidation in the methane and carbon budget of a tropical reservoir                                                                  |
| 2.31E-03              | 1.00E-05                                                             | 3.33E-06             | 2005 Aerobic methane oxidation and methanotroph community composition during seasonal stratification in Mono Lake, California (USA)                                              |
| 2.35E-04              | 1.52E-05                                                             | 4.98E-05             | 2007 Significance of pelagic aerobic methane oxidation in the methane and carbon budget of a tropical reservoir                                                                  |
| 1.54E-04              | 2.00E-05                                                             | 1.00E-04             | 2018 Anaerobic methane oxidation and aerobic methane production in an east African great lake (Lake Kivu)                                                                        |
| 1.54E-03              | 2.10E-05                                                             | 1.05E-05             | 2005 Aerobic methane oxidation and methanotroph community composition during seasonal stratification in Mono Lake, California (USA)                                              |
| 1.46E-02              | 4.30E-05                                                             | 2.26E-06             | 2007 Significance of pelagic aerobic methane oxidation in the methane and carbon budget of a tropical reservoir                                                                  |
| 2.69E-04              | 4.60E-05                                                             | 1.31E-04             | 2018 Anaerobic methane oxidation and aerobic methane production in an east African great lake (Lake Kivu)                                                                        |
| 2.69E-03              | 8.00E-05                                                             | 2.29E-05             | 2005 Aerobic methane oxidation and methanotroph community composition during seasonal stratification in Mono Lake, California (USA)                                              |
| 3.08E-03              | 1.20E-04                                                             | 3.00E-05             | 2005 Aerobic methane oxidation and methanotroph community composition during seasonal stratification in Mono Lake, California (USA)                                              |
| 4.62E-05              | 1.34E-04                                                             | 2.23E-03             | 2007 Significance of pelagic aerobic methane oxidation in the methane and carbon budget of a tropical reservoir                                                                  |
| 7.23E-04              | 1.67E-04                                                             | 1.77E-04             | 2007 Significance of pelagic aerobic methane oxidation in the methane and carbon budget of a tropical reservoir                                                                  |
| 2.77E-03              | 6.20E-04                                                             | 1.72E-04             | 2018 Anaerobic methane oxidation and aerobic methane production in an east African great lake (Lake Kivu)                                                                        |
| 7.69E-03              | 8.00E-04                                                             | 8.00E-05             | 2018 Anaerobic methane oxidation and aerobic methane production in an east African great lake (Lake Kivu)                                                                        |
| 3.85E-02              | 8.90E-04                                                             | 1.78E-05             | 2007 Significance of pelagic aerobic methane oxidation in the methane and carbon budget of a tropical reservoir                                                                  |
| 1.92E-01              | 1.00E-03                                                             | 4.00E-06             | 2007 Significance of pelagic aerobic methane oxidation in the methane and carbon budget of a tropical reservoir                                                                  |
| 3.15E-04              | 1.10E-03                                                             | 2.68E-03             | 2007 Significance of pelagic aerobic methane oxidation in the methane and carbon budget of a tropical reservoir                                                                  |
| 1.00E+00              | 1.20E-03                                                             | -                    | 2017 Effects of alternative electron acceptors on the activity and community structure of methane-producing and consuming microbes in the sediments of two shallow boreal lakes. |

|          |          |          |                                                                                                                                                                                  |
|----------|----------|----------|----------------------------------------------------------------------------------------------------------------------------------------------------------------------------------|
| 2.40E-03 | 1.88E-03 | 6.00E-04 | 2015 Geographic and seasonal variation of dissolved methane and aerobic methane oxidation in Alaskan lakes                                                                       |
| 6.15E-02 | 1.92E-03 | 2.40E-05 | 2007 Significance of pelagic aerobic methane oxidation in the methane and carbon budget of a tropical reservoir                                                                  |
| 1.77E-01 | 2.50E-03 | 1.09E-05 | 2015 Geographic and seasonal variation of dissolved methane and aerobic methane oxidation in Alaskan lakes                                                                       |
| 1.44E-03 | 2.50E-03 | 1.33E-03 | 2015 Geographic and seasonal variation of dissolved methane and aerobic methane oxidation in Alaskan lakes                                                                       |
| 1.44E-03 | 2.50E-03 | 1.33E-03 | 2015 Geographic and seasonal variation of dissolved methane and aerobic methane oxidation in Alaskan lakes                                                                       |
| 1.23E-01 | 3.00E-03 | 1.88E-05 | 2007 Significance of pelagic aerobic methane oxidation in the methane and carbon budget of a tropical reservoir                                                                  |
| 2.79E-02 | 3.13E-03 | 8.62E-05 | 2015 Geographic and seasonal variation of dissolved methane and aerobic methane oxidation in Alaskan lakes                                                                       |
| 4.68E-01 | 3.70E-03 | 6.08E-06 | 2007 Significance of pelagic aerobic methane oxidation in the methane and carbon budget of a tropical reservoir                                                                  |
| 1.00E+00 | 4.10E-03 | -        | 2017 Effects of alternative electron acceptors on the activity and community structure of methane-producing and consuming microbes in the sediments of two shallow boreal lakes. |
| 3.09E-01 | 5.00E-03 | 1.24E-05 | 2015 Geographic and seasonal variation of dissolved methane and aerobic methane oxidation in Alaskan lakes                                                                       |
| 1.54E-05 | 7.20E-03 | 3.60E-01 | 2007 Significance of pelagic aerobic methane oxidation in the methane and carbon budget of a tropical reservoir                                                                  |
| 3.85E-03 | 7.50E-03 | 1.50E-03 | 2015 Geographic and seasonal variation of dissolved methane and aerobic methane oxidation in Alaskan lakes                                                                       |
| 3.92E-04 | 8.00E-03 | 1.57E-02 | 2007 Significance of pelagic aerobic methane oxidation in the methane and carbon budget of a tropical reservoir                                                                  |
| 4.33E-03 | 9.38E-03 | 1.67E-03 | 2015 Geographic and seasonal variation of dissolved methane and aerobic methane oxidation in Alaskan lakes                                                                       |
| 6.92E-04 | 1.20E-02 | 1.33E-02 | 2007 Significance of pelagic aerobic methane oxidation in the methane and carbon budget of a tropical reservoir                                                                  |
| 4.68E-01 | 1.70E-02 | 2.79E-05 | 2007 Significance of pelagic aerobic methane oxidation in the methane and carbon budget of a tropical reservoir                                                                  |
| 7.69E-03 | 1.80E-02 | 1.80E-03 | 2007 Significance of pelagic aerobic methane oxidation in the methane and carbon budget of a tropical reservoir                                                                  |
| 1.00E+00 | 1.80E-02 | -        | 2017 Effects of alternative electron acceptors on the activity and community structure of methane-producing and consuming microbes in the sediments of two shallow boreal lakes. |
| 3.23E-02 | 2.70E-02 | 6.43E-04 | 2018 Anaerobic methane oxidation and aerobic methane production in an east African great lake (Lake Kivu)                                                                        |
| 3.08E-02 | 2.90E-02 | 7.25E-04 | 2007 Significance of pelagic aerobic methane oxidation in the methane and carbon budget of a tropical reservoir                                                                  |
| 1.00E+00 | 4.93E-02 | -        | 2017 Effects of alternative electron acceptors on the activity and community structure of methane-producing and consuming microbes in the sediments of two shallow boreal lakes. |
| 1.54E-03 | 1.20E-01 | 6.00E-02 | 2015 Microbial methane cycling in the bed of a chalk river: oxidation has the potential to match methanogenesis enhanced by warming                                              |
| 3.08E-03 | 2.88E-01 | 7.20E-02 | 2015 Microbial methane cycling in the bed of a chalk river: oxidation has the potential to match methanogenesis enhanced by warming                                              |
| 4.62E-03 | 3.60E-01 | 6.00E-02 | 2015 Microbial methane cycling in the bed of a chalk river: oxidation has the potential to match methanogenesis enhanced by warming                                              |
| 5.38E-03 | 4.80E-01 | 6.86E-02 | 2015 Microbial methane cycling in the bed of a chalk river: oxidation has the potential to match methanogenesis enhanced by warming                                              |
| 4.62E-05 | 4.80E-02 | 8.00E-01 | 2015 Microbial methane cycling in the bed of a chalk river: oxidation has the potential to match methanogenesis enhanced by warming                                              |
| 6.92E-05 | 1.08E-01 | 1.20E+00 | 2015 Microbial methane cycling in the bed of a chalk river: oxidation has the potential to match methanogenesis enhanced by warming                                              |
| 9.15E-05 | 1.32E-01 | 1.11E+00 | 2015 Microbial methane cycling in the bed of a chalk river: oxidation has the potential to match methanogenesis enhanced by warming                                              |
| 8.46E-05 | 7.10E-05 | 6.45E-04 | 2019 Methane dynamics in a large river: a case study of the Elbe River                                                                                                           |
| 3.08E-04 | 4.30E-05 | 1.08E-04 | 2019 Methane dynamics in a large river: a case study of the Elbe River                                                                                                           |
| 3.08E-05 | 2.00E-09 | 5.00E-08 | 2019 Methane dynamics in a large river: a case study of the Elbe River                                                                                                           |
| 2.69E-05 | 2.00E-07 | 5.71E-06 | 2019 Methane dynamics in a large river: a case study of the Elbe River                                                                                                           |
| 5.77E-05 | 1.30E-05 | 1.73E-04 | 2019 Methane dynamics in a large river: a case study of the Elbe River                                                                                                           |

|          |          |          |                                                                        |
|----------|----------|----------|------------------------------------------------------------------------|
| 3.85E-04 | 2.76E-04 | 5.52E-04 | 2019 Methane dynamics in a large river: a case study of the Elbe River |
| 2.00E-04 | 3.00E-05 | 1.15E-04 | 2019 Methane dynamics in a large river: a case study of the Elbe River |
| 3.69E-04 | 4.00E-05 | 8.33E-05 | 2019 Methane dynamics in a large river: a case study of the Elbe River |
| 3.15E-04 | 5.00E-05 | 1.22E-04 | 2019 Methane dynamics in a large river: a case study of the Elbe River |
| 1.54E-04 | 1.00E-05 | 5.00E-05 | 2019 Methane dynamics in a large river: a case study of the Elbe River |
| 1.92E-04 | 1.50E-05 | 6.00E-05 | 2019 Methane dynamics in a large river: a case study of the Elbe River |
| 9.23E-05 | 7.00E-06 | 5.83E-05 | 2019 Methane dynamics in a large river: a case study of the Elbe River |
| 7.69E-05 | 3.00E-06 | 3.00E-05 | 2019 Methane dynamics in a large river: a case study of the Elbe River |
| 2.00E-04 | 6.00E-06 | 2.31E-05 | 2019 Methane dynamics in a large river: a case study of the Elbe River |

## References (refer to the main text for most of the references for the tables):

1. C. Chen, CiteSpace II: Detecting and visualizing emerging trends and transient patterns in scientific literature, *Journal of the American Society for Information Science and Technology*, 2006, **57**, 359-377.
2. S. Hu, R. J. Zeng, M. F. Haroon, J. Keller, P. A. Lant, G. W. Tyson and Z. Yuan, A laboratory investigation of interactions between denitrifying anaerobic methane oxidation (DAMO) and anammox processes in anoxic environments, *Scientific Reports*, 2015, **5**, 8706.
3. S. Joye, Sediment geochemistry and process rate measurements aboard the R/V Endeavor cruise EN586 in the northern Gulf of Mexico from 2016-07-26 to 2016-08-14, *Journal*, 2018, DOI: 10.7266/N7B56H4H.
4. C. Cassarini, Y. Zhang and P. N. L. Lens, Pressure Selects Dominant Anaerobic Methanotrophic Phylotype and Sulfate Reducing Bacteria in Coastal Marine Lake Grevelingen Sediment, *Frontiers in Environmental Science*, 2019, **6**.
5. S. D. Wankel, S. B. Joye, V. A. Samarkin, S. R. Shah, G. Friederich, J. Melas-Kyriazi and P. R. Girguis, New constraints on methane fluxes and rates of anaerobic methane oxidation in a Gulf of Mexico brine pool via in situ mass spectrometry, *Deep Sea Research Part II: Topical Studies in Oceanography*, 2010, **57**, 2022-2029.
6. M. W. Bowles, V. A. Samarkin, K. S. Hunter, N. Finke, A. P. Teske, P. R. Girguis and S. B. Joye, Remarkable Capacity for Anaerobic Oxidation of Methane at High Methane Concentration, *Geophysical Research Letters*, 2019, **46**, 12192-12201.
7. M. Krüger, T. Treude, H. Wolters, K. Nauhaus and A. Boetius, Microbial methane turnover in different marine habitats, *Palaeogeography, Palaeoclimatology, Palaeoecology*, 2005, **227**, 6-17.
8. S. Bhattarai, Y. Zhang and P. N. L. Lens, Effect of pressure and temperature on anaerobic methanotrophic activities of a highly enriched ANME-2a community, *Environmental Science and Pollution Research*, 2018, **25**, 30031-30043.
9. S. Scheller, H. Yu, G. L. Chadwick, S. E. McGlynn and V. J. Orphan, Artificial electron acceptors decouple archaeal methane oxidation from sulfate reduction, *Science*, 2016, **351**, 703-707.
10. A. S. Savvichev, V. V. Kadnikov, M. D. Kravchishina, S. V. Galkin, A. N. Novigatskii, P. A. Sigalevich, A. Y. Merkel, N. V. Ravin, N. V. Pimenov and M. V. Flint, Methane as an Organic Matter Source and the Trophic Basis of a Laptev Sea Cold Seep Microbial Community, *Geomicrobiology Journal*, 2018, **35**, 411-423.
11. J. J. Marlow, D. Hoer, S. P. Jungbluth, L. M. Reynard, A. Gartman, M. S. Chavez, M. Y. El-Naggar, N. Tuross, V. J. Orphan and P. R. Girguis, Carbonate-hosted microbial communities are prolific and pervasive methane oxidizers at geologically diverse marine methane seep sites, *Proceedings of the National Academy of Sciences*, 2021, **118**, e2006857118.
12. A. Boetius and F. Wenzhöfer, Seafloor oxygen consumption fuelled by methane from cold seeps, *Nature Geoscience*, 2013, **6**, 725-734.
13. K. U. Hinrichs and A. Boetius, in *Ocean Margin Systems*, eds. G. Wefer, D. Billett, D. Hebbeln, B. B. Jørgensen, M. Schlüter and T. C. E. van Weering, Springer Berlin Heidelberg, Berlin, Heidelberg, 2003, DOI: 10.1007/978-3-662-05127-6\_28, pp. 457-477.
14. M. Saunio, A. R. Staver, B. Poulter, P. Bousquet, J. G. Canadell, R. B. Jackson, P. A. Raymond, E. J. Dlugokencky, S. Houweling, P. K. Patra, P. Ciais, V. K. Arora, D. Bastviken, P. Bergamaschi, D. R. Blake, G. Brailsford, L. Bruhwiler, K. M. Carlson, M. Carrol, S. Castaldi, N. Chandra, C. Crevoisier, P. M. Crill, K. Covey, C. L. Curry, G. Etiope, C. Frankenberg, N. Gedney, M. I. Hegglin, L. Höglund-Isaksson, G. Hugelius, M. Ishizawa, A. Ito, G. Janssens-Maenhout, K. M. Jensen, F. Joos, T. Kleinen, P. B. Krummel, R. L. Langenfeld, G. G. Laruelle, L. Liu, T. Machida, S. Maksyutov, K. C. McDonald, J. McNorton, P. A. Miller, J. R. Melton, I. Morino, J. Müller, F. Murguía-Flores, V. Naik, Y. Niwa, S. Noce, S. O'Doherty, R. J. Parker, C. Peng, S. Peng, G. P. Peters, C. Prigent, R. Prinn, M. Ramonet, P. Regnier, W. J. Riley, J. A. Rosentreter, A. Seger, I. J. Simpson, H. Shi, S. J. Smith, L. P. Steel, B. F. Thornton, H. Tian, Y. Tohjima, F. N. Tubille, A. Tsuruta, N. Viovy, A. Voulgarakis, T. S. Weber, M. van Weele, G. R. van der Werf, R. F. Weiss, D. Worthy, D. Wunch, Y. Yin, Y. Yoshida, W. Zhang, Z. Zhang, Y. Zhao, B. Zheng, Q. Zhu, Q. Zhu and Q. Zhuang, The Global Methane Budget 2000–2017, *Earth System Science Data*, 2020, **12**, 1561-1623.
15. M. Egger, N. Riedinger, J. M. Mogollón and B. B. Jørgensen, Global diffusive fluxes of methane in marine sediments, *Nature Geoscience*, 2018, **11**, 421-425.
16. S. Bhattarai, C. Cassarini, G. Gonzalez-Gil, M. Egger, C. P. Slomp, Y. Zhang, G. Esposito and P. N. L. Lens, Anaerobic Methane-Oxidizing Microbial Community in a Coastal Marine Sediment: Anaerobic Methanotrophy Dominated by ANME-3, *Microbial Ecology*, 2017, **74**, 608-622.
17. M. Egger, O. Rasigraf, C. J. Sapart, T. Jilbert, M. S. M. Jetten, T. Röckmann, C. van der Veen, N. Bândă, B. Kartal, K. F. Ettwig and C. P. Slomp, Iron-Mediated Anaerobic Oxidation of Methane in Brackish Coastal Sediments, *Environmental*

- Science & Technology*, 2015, **49**, 277-283.
18. O. SIVAN, D. P. SCHRAG and R. W. MURRAY, Rates of methanogenesis and methanotrophy in deep-sea sediments, *Geobiology*, 2007, **5**, 141-151.
  19. N. J. Knab, A. W. Dale, K. Lettmann, H. Fossing and B. B. Jørgensen, Thermodynamic and kinetic control on anaerobic oxidation of methane in marine sediments, *Geochimica et Cosmochimica Acta*, 2008, **72**, 3746-3757.
  20. C. Hensen, M. Zabel, K. Pfeifer, T. Schwenk, S. Kasten, N. Riedinger, H. D. Schulz and A. Boetius, Control of sulfate pore-water profiles by sedimentary events and the significance of anaerobic oxidation of methane for the burial of sulfur in marine sediments, *Geochimica et Cosmochimica Acta*, 2003, **67**, 2631-2647.
  21. W. S. Borowski, T. M. Hoehler, M. J. Alperin, N. M. Rodriguez and C. K. Paull, 2000.
  22. P. Regnier, A. W. Dale, S. Arndt, D. E. LaRowe, J. Mogollón and P. Van Cappellen, Quantitative analysis of anaerobic oxidation of methane (AOM) in marine sediments: A modeling perspective, *Earth-Science Reviews*, 2011, **106**, 105-130.
